# Supplementary material for: Effect of Tff3 Deficiency and ER Stress in the Liver
Source: Int J Mol Sci. 2019 Sep 6;20(18):4389. doi: 10.3390/ijms20184389 (PMC6770867; doi:10.3390/ijms20184389)
Supplement: Supplementary file 1 [file ijms-20-04389-s001.xlsx]

## Sheet: ALL Sheet1
Accession	Pvalue	FDR	FC	log2FC	Gene Symbol	Description	Master	Exp. q-value: Combined	Contaminant	Sum PEP Score	Coverage [%]	# Peptides	# PSMs	# Unique Peptides	# AAs	MW [kDa]	calc. pI	Score Sequest HT: Sequest HT	# Peptides (by Search Engine): Sequest HT
49728	0.047619	0.450719	0.97495	-0.0366	Pdia4	unnamed protein product [Mus musculus]	None	0	FALSE	202.599	52	28	103	28	584	65.7	5.26	368.11	28
50527	0.015873	0.283682	1.09479	0.130656	Cox5a	cytochrome c oxidase subunit Va preprotein [Mus musculus]	Master Protein Candidate	0	FALSE	46.107	53	5	22	5	145	16	6.54	76.92	5
50595	0.031746	0.353216	1.08419	0.116616	Cat	unnamed protein product [Mus musculus]	None	0	FALSE	299.339	68	30	120	30	527	59.7	7.88	420.89	30
50852	0.031746	0.353216	1.12708	0.172594	Grn	Epithelin 1 & 2 [Mus musculus]	Master Protein Candidate	0	FALSE	16.19	10	4	6	4	589	63.5	6.87	25.39	4
54777	0.031746	0.353216	0.951485	-0.071747	P4hb	unnamed protein product [Mus musculus]	Master Protein Candidate	0	FALSE	325.07	71	33	200	24	509	57.1	4.91	737.73	33
117502	0.031746	0.353216	0.938477	-0.0916074	Calr	RecName: Full=Calreticulin; AltName: Full=CRP55; AltName: Full=Calregulin; AltName: Full=Endoplasmic reticulum resident protein 60; Short=ERp60; AltName: Full=HACBP; Flags: Precursor	Master Protein	0	FALSE	242.289	67	22	119	22	416	48	4.49	413.06	22
135835	0.015873	0.283682	1.08884	0.122793	Ptma	RecName: Full=Prothymosin alpha; Contains: RecName: Full=Prothymosin alpha, N-terminally processed; Contains: RecName: Full=Thymosin alpha	Master Protein Candidate	0	FALSE	24.966	22	3	9	3	111	12.2	3.79	29.47	3
191493	0.031746	0.353216	1.23785	0.307835	Fabp4	13K protein, partial [Mus musculus]	Master Protein Candidate	0	FALSE	8.098	16	2	4	2	122	13.5	8.63	11.68	2
191767	0.031746	0.353216	1.12708	0.172594	Grn	acrogranin [Mus musculus]	Master Protein Candidate	0	FALSE	16.19	10	4	6	4	589	63.4	6.8	25.39	4
192005	0.015873	0.283682	1.20434	0.26824	Apoe	apolipoprotein E, partial [Mus musculus domesticus]	Master Protein Candidate	0	FALSE	65.192	47	13	28	13	286	33.2	6.05	84.56	13
192865	0.015873	0.283682	0.938175	-0.0920715	Ppib	cyclophilin [Mus musculus domesticus]	Master Protein Candidate	0	FALSE	53.7	49	11	35	10	208	22.7	9.48	100.21	11
193645	0.015873	0.283682	0.891283	-0.166044	Hspa5	glucose-regulated protein 78, partial [Mus musculus]	None	0	FALSE	91.396	76	12	69	12	168	18.9	4.72	238.75	12
198578	0.015873	0.283682	1.05502	0.0772651	Rps18	ribosomal protein [Mus musculus]	Master Protein Candidate	0	FALSE	18.413	29	5	12	5	152	17.7	11.12	36.06	5
200679	0.015873	0.283682	1.12462	0.169438	Rbp4	retinol-binding protein, partial [Mus musculus]	None	0	FALSE	22.016	38	5	9	5	179	20.4	5.15	26.52	5
202225	0.015873	0.283682	1.06723	0.0938669	Tuba1b	alpha-tubulin, partial [Mus musculus]	None	0	FALSE	104.396	46	13	39	3	352	39.3	5.15	134.45	13
220474	0.0357143	0.395584	1.08696	0.120294	Lmna	lamin A, partial [Mus musculus]	None	0	FALSE	55.656	26	9	17	8	431	47.5	7.06	51.8	9
225879	0.031746	0.353216	1.12894	0.174969	Adh1	alcohol dehydrogenase	Master Protein	0	FALSE	181.847	72	19	107	19	375	39.7	8.1	409.06	19
226778	0.015873	0.283682	0.88674	-0.173416		carbonic anhydrase III	None	0	FALSE	180.476	68	15	87	15	259	29.3	7.87	316.62	15
227293	0.031746	0.353216	1.01434	0.0205474		cathepsin B	None	0	FALSE	45.424	24	6	15	6	339	37.4	6.21	53.91	6
309122	0.015873	0.283682	0.894539	-0.160784	C3	preprocomplement component C3 [Mus musculus]	Master Protein Candidate	0	FALSE	79.117	14	19	32	19	1663	186.4	6.87	76.26	19
309127	0.015873	0.283682	0.88674	-0.173416	Car3	carbonic anhydrase III (EC 4.2.1.1) [Mus musculus]	None	0	FALSE	180.476	68	15	87	15	260	29.5	7.85	316.62	15
309202	0.031746	0.353216	1.01434	0.0205474	Ctsb	mouse preprocathepsin B [Mus musculus]	Master Protein Candidate	0	FALSE	46.705	27	7	16	7	339	37.3	5.76	56.2	7
309220	0.0238095	0.353216	0.963228	-0.0540511	Hsp90b1	endoplasmic reticulum transmembrane protein precursor [Mus musculus]	Master Protein Candidate	0	FALSE	402.511	63	42	214	41	802	92.4	4.82	719.12	42
309268	0.031746	0.353216	1.06974	0.0972619	Gpi1	glucose phosphate isomerase, partial [Mus musculus]	None	0	FALSE	20.894	21	5	12	5	290	32.7	7.24	39.73	5
387113	0.015873	0.283682	0.890855	-0.166737	Hspa5	immunoglobulin heavy chain binding protein, partial [Mus musculus]	None	0	FALSE	80.646	70	10	60	10	142	16.2	4.69	225.87	10
387114	0.015873	0.283682	0.894539	-0.160784	C3	complement component C3 prepropeptide, last, partial [Mus musculus]	Master Protein Candidate	0	FALSE	79.117	14	19	32	19	1663	186.4	6.81	76.26	19
387129	0.015873	0.283682	0.947835	-0.0772927	Mdh1	cytosolic malate dehydrogenase, partial [Mus musculus]	Master Protein Candidate	0	FALSE	130.788	45	16	67	16	334	36.5	6.58	223.64	16
387401	0.031746	0.353216	1.23785	0.307835	Fabp4	adipocyte lipid binding protein, partial [Mus musculus]	Master Protein Candidate	0	FALSE	8.098	14	2	4	2	132	14.7	8.4	11.68	2
387504	0.031746	0.353216	1.23785	0.307835	Fabp4	adipocyte P2, partial [Mus musculus]	Master Protein Candidate	0	FALSE	8.098	14	2	4	2	132	14.6	8.4	11.68	2
398048	0.031746	0.353216	1.0844	0.116899	Rpl12	ribosomal protein L12 [Mus musculus]	None	0	FALSE	36.633	44	6	17	6	165	17.8	9.42	48.92	6
436577	0.00793651	0.283682	1.13376	0.181113	Cpox	coproporphyrinogen oxidase [Mus musculus]	Master Protein Candidate	0	FALSE	29.33	19	6	12	6	354	40.6	7.52	23.72	6
442441	0.031746	0.353216	1.08419	0.116616	Cat	catalase [Mus musculus]	None	0	FALSE	299.339	68	30	120	30	527	59.7	8.07	420.89	30
454835	0.015873	0.283682	1.10363	0.14226	Abcd3	peroxisome membrane protein [Mus musculus domesticus]	None	0	FALSE	68.806	24	13	28	13	659	75.4	9.29	77.62	13
497942	0.015873	0.283682	0.872611	-0.196589	Ugt1a6a	UGT1.6 [Mus musculus]	None	0	FALSE	49.349	19	8	26	3	531	60.4	8.69	82.46	8
554269	0.0238095	0.353216	1.07514	0.104522	Rpl7	ribosomal protein L7, partial [Mus musculus]	None	0	FALSE	27.978	27	6	18	6	244	28.4	10.9	46.74	6
555835	0.015873	0.283682	1.11588	0.158182	Hmgcs2	HMG CoA synthase, partial [Mus musculus]	None	0	FALSE	188.251	55	21	108	21	432	47.9	7.59	388	21
576133	0.00793651	0.283682	0.442222	-1.17716		Chain A, GLUTATHIONE S-TRANSFERASE YFYF	Master Protein Candidate	0	FALSE	154.541	59	9	89	9	209	23.5	7.87	366.01	9
577420	0.00793651	0.283682	0.445099	-1.1678	Gstp1	glutathione S-transferase pi class B [Mus musculus]	None	0	FALSE	145.203	54	8	79	8	210	23.6	7.87	334.42	8
666968	0.00793651	0.283682	1.35267	0.435808	Cyp3a16	cytochrome P450IIIA [Mus musculus]	None	0	FALSE	14.67	10	5	10	5	504	57.9	7.42	29.63	5
687254	0.031746	0.353216	1.08148	0.113009	Aldh3a2	aldehyde deydrogenase [Mus musculus]	Master Protein Candidate	0	FALSE	42.683	28	11	16	11	484	53.9	8.35	46.65	11
726095	0.00793651	0.283682	1.14951	0.201022	Acadl	long-chain acyl-CoA dehydrogenase [Mus musculus]	None	0	FALSE	102.358	37	15	42	15	430	48.1	8.15	132.65	15
793931	0.031746	0.353216	0.905075	-0.14389	Tdo2	tryptophan-2,3-dioxygenase [Mus musculus]	None	0	FALSE	22.313	13	4	5	4	406	47.8	7.15	14.88	4
840650	0.031746	0.353216	0.681329	-0.553577	Hsd3b5	3-ketosteroid reductase [Mus musculus domesticus]	Master Protein Candidate	0	FALSE	23.792	15	5	5	4	373	41.9	9.1	15.38	5
1083243	0.00793651	0.283682	0.924378	-0.113445		calcium binding 140k protein - mouse (fragment)	None	0	FALSE	145.133	43	20	58	20	652	72.2	4.72	203.2	20
1125026	0.031746	0.353216	1.12067	0.164365	Hadh	3-hydroxyacyl CoA dehydrogenase [Mus musculus]	None	0	FALSE	94.217	48	14	48	14	303	33.1	7.96	140.49	14
1150764	0.015873	0.283682	1.08715	0.120552	Acadvl	very-long chain acyl-CoA dehydrogenase, partial [Mus musculus]	None	0	FALSE	16.132	13	4	7	4	318	34.8	9.14	24.51	4
1170154	0.0285714	0.353216	1.13333	0.180572	Hist1h1b	RecName: Full=Histone H1.5; AltName: Full=H1 VAR.5; AltName: Full=H1b	Master Protein	0	FALSE	30.337	26	6	20	3	223	22.6	10.92	41.22	6
1200246	0.00793651	0.283682	0.807273	-0.308872	S100a8	MRP8 protein [Mus musculus]	None	0	FALSE	11.361	57	3	7	3	89	10.3	5.68	20.46	3
1226238	0.015873	0.283682	0.465318	-1.10371	Cyp7b1	cytochrome P450 Cyp7b1 [Mus musculus]	Master Protein	0	FALSE	13.463	8	3	6	3	507	58.4	8.94	16.27	3
1272236	0.00793651	0.283682	1.09519	0.13118	Pon1	serum paraoxonase [Mus musculus]	Master Protein	0	FALSE	32.916	19	6	12	6	355	39.5	5.22	38.97	6
1304157	0.015873	0.283682	0.914286	-0.129283	Hspa5	78 kDa glucose-regulated protein [Mus musculus]	None	0	FALSE	409.512	59	37	247	34	655	72.4	5.2	904.52	37
1401252	0.015873	0.283682	1.12719	0.172735	Ndufa4	mlrq-like protein, partial [Mus musculus]	None	0	FALSE	17.342	40	3	12	3	75	8.5	9.31	37.56	3
1526541	0.00793651	0.283682	1.24267	0.313442	Ywhah	14-3-3 eta [Mus musculus]	None	0	FALSE	38.424	41	10	20	6	246	28.2	4.86	54.36	10
1589591	0.031746	0.353216	1.07143	0.0995357		isocitrate dehydrogenase	None	0	FALSE	85.508	32	17	39	17	523	58.7	8.57	117.76	17
1660992	0.015873	0.283682	0.872611	-0.196589	Ugt1a6a	phenol UDP-glucuronosyltransferase [Mus musculus]	None	0	FALSE	49.349	19	8	26	3	531	60.4	8.7	82.46	8
1711570	0.00793651	0.283682	1.31	0.389567	Sult1a1	RecName: Full=Sulfotransferase 1A1; Short=ST1A1; AltName: Full=Aryl sulfotransferase; AltName: Full=Phenol sulfotransferase; AltName: Full=Phenol/aryl sulfotransferase; Short=mSTp1; AltName: Full=ST1A4; AltName: Full=Sulfokinase	None	0	FALSE	82.567	53	11	32	11	291	34	8.1	98.4	11
1763275	0.015873	0.283682	0.944867	-0.0818169	Anp32a	acidic nuclear phosphoprotein pp32 [Mus musculus]	Master Protein Candidate	0	FALSE	38.281	37	8	15	8	247	28.5	4.08	43.29	8
1906808	0.015873	0.283682	1.11966	0.163058	Phyh	LN1 [Mus musculus]	Master Protein	0	FALSE	18.868	15	5	7	5	338	38.6	7.74	20.45	5
2145139	0.031746	0.353216	1.22782	0.2961	Apoa1	apolipoprotein A-I [Mus musculus]	None	0	FALSE	10.02	11	3	4	3	263	30.5	5.73	7.55	3
2275019	0.031746	0.353216	0.916992	-0.125019	Gstm6	glutathione-S-transferase class M5 [Mus musculus]	None	0	FALSE	35.748	34	8	30	4	218	25.7	6.57	82.76	8
2570413	0.00793651	0.283682	1.15778	0.211361	Acadl	long-chain acyl-CoA dehydrogenase, partial [Mus musculus]	None	0	FALSE	27.09	34	6	15	6	201	22	8.87	46.53	6
2598562	0.015873	0.283682	0.910433	-0.135375	Hspa5	BiP [Mus musculus]	None	0	FALSE	429.455	62	39	253	36	655	72.4	5.2	930.9	39
2612797	0.015873	0.283682	0.949102	-0.0753653	Nucb2	precursor NEFA protein [Mus musculus]	Master Protein Candidate	0	FALSE	40.384	22	8	16	8	420	50.2	5.15	45.69	8
2645721	0.015873	0.283682	1.10655	0.146068	Slc27a2	very-long-chain acyl-CoA synthetase [Mus musculus]	None	0	FALSE	124.482	37	18	43	18	620	70.3	8.84	132.27	18
3087820	0.015873	0.283682	1.10655	0.146068	Slc27a2	very-long-chain acyl-CoA synthetase [Mus musculus]	None	0	FALSE	124.482	37	18	43	18	620	70.4	8.9	132.27	18
3097244	0.0396825	0.428629	1.0836	0.115829	Rps14	ribosomal protein S14 [Mus musculus]	Master Protein Candidate	0	FALSE	30.143	38	5	14	5	151	16.3	10.13	48.31	5
3123646	0.047619	0.450719	1.07089	0.0988123	Atp5l	F1F0-ATP synthase g subunit [Mus musculus]	Master Protein Candidate	0	FALSE	11.361	27	2	9	2	103	11.4	9.74	32.63	2
3318753	0.031746	0.353216	1.23785	0.307835		Chain B, Pyridoxamine Modified Murine Adipocyte Lipid Binding Protein	Master Protein Candidate	0	FALSE	8.098	15	2	4	2	131	14.5	8.62	11.68	2
3335565	0.00793651	0.283682	1.10626	0.145686	Slc27a2	fatty acid transport protein 2 [Mus musculus]	None	0	FALSE	127.96	36	17	43	17	623	70.5	8.88	141.88	17
3335571	0.031746	0.353216	1.09162	0.126468	Slc27a5	fatty acid transport protein 5 [Mus musculus]	Master Protein Candidate	0	FALSE	52.313	23	10	16	10	662	73.2	8.22	47.21	10
3341462	0.031746	0.353216	1.09473	0.130571	Slc27a5	very-long-chain acyl-CoA synthetase related protein [Mus musculus]	None	0	FALSE	48.711	18	8	14	8	689	76.1	8.41	44.17	8
3342500	0.031746	0.353216	1.10428	0.1431	Ppp2ca	protein phosphatase type 2A catalytic subunit alpha isoform [Mus musculus]	Master Protein Candidate	0	FALSE	15.549	12	3	5	3	309	35.6	5.54	14.92	3
3641400	0.015873	0.283682	0.931545	-0.102303	Idh1	NADP-dependent isocitrate dehydrogenase [Mus musculus]	None	0	FALSE	216.208	72	27	100	27	414	46.6	6.93	352.12	27
4050105	0.015873	0.283682	1.05502	0.0772651	Rps18	RPS18 [Mus musculus]	Master Protein Candidate	0	FALSE	18.413	29	5	12	5	152	17.7	10.99	36.06	5
4102182	0.015873	0.283682	1.04418	0.0623659	Pck1	phosphoenolpyruvate carboxykinase [Mus musculus]	Master Protein Candidate	0	FALSE	160.983	56	26	68	26	622	69.3	6.6	216.06	26
4249595	0.015873	0.283682	1.20021	0.263281	Cyp2c40	CYP2C40 [Mus musculus]	Master Protein Candidate	0	FALSE	29.824	15	7	12	7	491	55.7	7.52	33.05	7
4557948	0.015873	0.283682	0.466042	-1.10147		Chain E, Modified Glutathione S-Transferase (Pi) Complexed With S (P- Nitrobenzyl)glutathione	None	0	FALSE	117.589	47	8	70	8	209	23.5	7.96	280.57	8
4678582	0.031746	0.353216	0.960606	-0.0579832	Atp2a2	SERCA2b isoform, partial [Mus musculus]	None	0	FALSE	36.694	17	9	17	9	571	63.1	5.83	45.66	9
4760598	0.0396825	0.428629	1.03719	0.0526803	Ak2	adenylate kinase isozyme 2 [Mus musculus]	None	0	FALSE	57.039	35	6	23	6	232	25.8	7.3	88.54	6
4836511	0.031746	0.353216	1.06531	0.0912681	Ndufa2	NADH-ubiquinone oxidoreductase B8 subunit [Mus musculus]	Master Protein Candidate	0	FALSE	14.801	30	3	5	3	99	10.9	9.99	15.55	3
5420463	0.00793651	0.283682	1.31	0.389567	Sult1a1	arylsulfotransferase ST1A4 [Mus musculus]	None	0	FALSE	82.567	52	11	32	11	298	34.7	8.1	98.4	11
5830360	0.015873	0.283682	1.12665	0.172042	Ehhadh	L-specific multifunctional beta-oxdiation protein [Mus musculus]	None	0	FALSE	40.131	44	9	12	9	284	32	9.1	35.96	9
5932290	0.015873	0.283682	1.29564	0.373668	Igh-VJ558	immunoglobulin heavy chain constant region, partial [Mus musculus]	None	0	FALSE	13.114	25	3	3	3	243	26.2	5.01	11.53	3
6407376	0.031746	0.353216	0.941176	-0.0874628	Akr1c13	aldo-keto reductase AKR1C13 [Mus musculus]	None	0	FALSE	67.037	50	13	27	5	323	37	7.34	87.33	13
6644338	0.0396825	0.428629	0.863158	-0.212304	Prdx5	peroxiredoxin V [Mus musculus]	None	0	FALSE	56.983	45	8	28	8	209	22	8.66	93.33	8
6680027	0.0238095	0.353216	1.04167	0.0588937	Glud1	glutamate dehydrogenase 1, mitochondrial precursor [Mus musculus]	Master Protein	0	FALSE	278.05	60	27	126	27	558	61.3	8	427.71	27
6688685	0.031746	0.353216	1.05986	0.0838676	Hacl1	2-hydroxyphytanoyl-CoA lyase [Mus musculus]	None	0	FALSE	92.13	32	15	33	15	581	63.6	6.27	95.11	15
6730327	0.015873	0.283682	1.97025	0.978376		Chain A, Solution Structure Of The Alpha-Domain Of Mouse Metallothionein-1	Master Protein Candidate	0	FALSE	15.424	65	2	7	2	31	3	7.97	23.53	2
6755114	0.031746	0.353216	0.88447	-0.177115	Prdx5	peroxiredoxin-5, mitochondrial isoform 1 precursor [Mus musculus]	Master Protein	0	FALSE	78.498	60	10	36	10	210	21.9	8.85	131.7	10
6840853	0.031746	0.353216	1.08467	0.117254	Gpi1	structural glucose phosphate isomerase 1, partial [Mus musculus]	None	0	FALSE	15.241	35	4	10	4	127	14.2	7.62	31.14	4
6983853	0.031746	0.353216	0.845679	-0.241818	Arpc3	Arp2/3 complex subunit p21-Arc [Mus musculus]	Master Protein	0	FALSE	13.851	28	5	6	5	178	20.5	8.59	11.8	5
7305285	0.015873	0.283682	1.97025	0.978376	Mt1	metallothionein-1 [Mus musculus]	Master Protein	0	FALSE	15.424	33	2	7	2	61	6	7.96	23.53	2
7670490	0.031746	0.353216	0.93148	-0.102404	Gstz1	unnamed protein product [Mus musculus]	None	0	FALSE	82.416	86	9	37	9	141	15.9	6.55	137.6	9
8170809	0.015873	0.283682	0.708151	-0.497872	Selenbp2	AP56 [Mus musculus]	Master Protein	0	FALSE	302.936	83	31	131	7	472	52.6	6.18	506.17	31
8886499	0.00793651	0.283682	0.874768	-0.193028	Cml2; Nat8f2	putative N-acetyltransferase Camello 2 [Mus musculus]	Master Protein Candidate	0	FALSE	15.434	9	2	6	2	238	26.4	9.58	15.53	2
10129957	0.031746	0.353216	0.88447	-0.177115	Prdx5	peroxiredoxin 5 [Mus musculus]	Master Protein Candidate	0	FALSE	78.498	77	10	36	10	162	17	7.87	131.7	10
12642664	0.0238095	0.353216	0.95809	-0.0617674	Gnmt	glycine N-methyltransferase [Mus musculus]	Master Protein	0	FALSE	150.125	68	12	65	12	293	32.7	7.44	254.45	12
12698456	0.031746	0.353216	1.08148	0.113009	Aldh3a2	fatty aldehyde dehydrogenase [Mus musculus]	Master Protein Candidate	0	FALSE	42.683	28	11	16	11	484	53.9	8.35	46.65	11
12698457	0.031746	0.353216	1.08148	0.113009	Aldh3a2	fatty aldehyde dehydrogenase variant form [Mus musculus]	Master Protein Candidate	0	FALSE	42.683	27	11	16	11	507	56.6	9.09	46.65	11
12832275	0.00793651	0.283682	1.07775	0.108028	Msra	unnamed protein product [Mus musculus]	None	0	FALSE	36.066	37	7	13	7	233	25.9	8.16	38.48	7
12835845	0.015873	0.283682	0.914116	-0.12955	Hspa5	unnamed protein product [Mus musculus]	None	0	FALSE	417.606	61	37	248	34	655	72.4	5.11	923.19	37
12835990	0.015873	0.283682	1.10652	0.146032	Abcd3	unnamed protein product [Mus musculus]	None	0	FALSE	67.756	24	13	27	13	659	75.4	9.17	75.61	13
12836415	0.00793651	0.283682	0.878352	-0.187128	Acadsb	unnamed protein product [Mus musculus]	Master Protein	0	FALSE	40.262	26	7	9	7	432	47.8	7.87	33.39	7
12836439	0.015873	0.283682	1.11052	0.151229	Hmgcs2	unnamed protein product [Mus musculus]	Master Protein Candidate	0	FALSE	222.995	55	24	129	24	508	56.8	8.41	466.84	24
12837652	0.015873	0.283682	0.946903	-0.078712	Mdh1	unnamed protein product [Mus musculus]	None	0	FALSE	116.939	41	15	63	15	334	36.4	6.28	208.77	15
12838108	0.0238095	0.353216	1.05858	0.0821326	Hacl1	unnamed protein product [Mus musculus]	Master Protein Candidate	0	FALSE	95.577	35	16	34	16	581	63.6	6.27	98.38	16
12839396	0.031746	0.353216	1.06455	0.0902441		unnamed protein product [Mus musculus]	None	0	FALSE	85.428	29	8	25	2	395	44	6.07	98.69	8
12839698	0.031746	0.353216	1.11354	0.15515	Acsl5	unnamed protein product [Mus musculus]	None	0	FALSE	29.644	29	8	14	6	268	29.6	5.96	36.43	8
12841973	0.047619	0.450719	1.07089	0.0988123	Atp5l	unnamed protein product [Mus musculus]	Master Protein	0	FALSE	11.361	22	2	9	2	129	14.2	8.63	32.63	2
12842885	0.015873	0.283682	0.919617	-0.120895	Ugt2a3	unnamed protein product [Mus musculus]	Master Protein	0	FALSE	43.542	21	8	21	8	534	61.1	7.65	52.96	8
12843447	0.00793651	0.283682	0.929511	-0.105456	Akr1c13	unnamed protein product [Mus musculus]	None	0	FALSE	69.774	61	14	26	5	323	37	6.84	83.76	14
12844914	0.0238095	0.353216	0.867047	-0.205819	Prdx5	unnamed protein product [Mus musculus]	None	0	FALSE	53.268	32	6	27	6	211	22.5	9	96.34	6
12845461	0.00793651	0.283682	1.16339	0.218337	Slc25a22	unnamed protein product [Mus musculus]	Master Protein	0	FALSE	28.481	29	8	11	8	323	34.6	9.09	29.18	8
12847100	0.00793651	0.283682	0.836906	-0.256863	Akr1a1	unnamed protein product, partial [Mus musculus]	None	0	FALSE	62.926	55	12	29	12	252	28.9	7.3	94.06	12
12847184	0.015873	0.283682	0.828413	-0.271577	Akr1a1	unnamed protein product, partial [Mus musculus]	None	0	FALSE	79.472	62	13	34	13	252	28.9	7.06	117.66	13
12847479	0.031746	0.353216	0.866795	-0.206237	Akr1a1	unnamed protein product [Mus musculus]	None	0	FALSE	103.302	61	18	51	18	325	36.5	7.39	160.4	18
12848221	0.047619	0.450719	1.07089	0.0988123	Atp5l	unnamed protein product [Mus musculus]	Master Protein Candidate	0	FALSE	11.361	27	2	9	2	103	11.4	9.66	32.63	2
12848244	0.031746	0.353216	0.87343	-0.195236	Akr1a1	unnamed protein product [Mus musculus]	None	0	FALSE	105.872	63	18	50	18	325	36.6	7.39	161.88	18
12848322	0.031746	0.353216	0.871845	-0.197857	Akr1a1	unnamed protein product [Mus musculus]	None	0	FALSE	106.449	57	17	48	17	325	36.5	7.17	159.03	17
12848338	0.031746	0.353216	0.866795	-0.206237	Akr1a1	unnamed protein product [Mus musculus]	None	0	FALSE	103.302	61	18	51	18	325	36.5	7.39	160.4	18
12850076	0.015873	0.283682	0.872521	-0.196738	Psma2	unnamed protein product [Mus musculus]	None	0	FALSE	14.425	19	3	8	3	234	26	7.94	17.78	3
12850141	0.015873	0.283682	1.06723	0.0938669	Tuba1c	unnamed protein product, partial [Mus musculus]	None	0	FALSE	104.396	47	13	39	3	344	38.3	5.15	134.45	13
12851714	0.031746	0.353216	0.903955	-0.145677	Scfd1	unnamed protein product [Mus musculus]	Master Protein	0	FALSE	7.323	8	4	5	4	639	72.3	6.27	6.34	4
12857969	0.00793651	0.283682	1.15168	0.203739	Acadl	unnamed protein product, partial [Mus musculus]	None	0	FALSE	96.308	40	14	38	14	375	41.9	6.67	116.17	14
12859516	0.047619	0.450719	1.07089	0.0988123	Atp5l	unnamed protein product [Mus musculus]	Master Protein Candidate	0	FALSE	11.361	27	2	9	2	103	11.4	9.74	32.63	2
12860603	0.00793651	0.283682	1.30805	0.387413	Hist1h1b	unnamed protein product, partial [Mus musculus]	None	0	FALSE	26.746	22	5	18	2	220	22.3	10.89	37.52	5
12963797	0.015873	0.283682	0.700724	-0.513082	Slco1a6	solute carrier organic anion transporter family member 1A6 [Mus musculus]	None	0	FALSE	10.369	4	2	4	2	670	74.1	7.99	13.92	2
13277828	0.031746	0.353216	1.08148	0.113009	Aldh3a2	Aldehyde dehydrogenase family 3, subfamily A2 [Mus musculus]	Master Protein Candidate	0	FALSE	42.683	28	11	16	11	484	53.9	8.35	46.65	11
13385310	0.015873	0.283682	0.960952	-0.0574632	Pccb	propionyl-CoA carboxylase beta chain, mitochondrial isoform 1 precursor [Mus musculus]	Master Protein	0	FALSE	65.008	35	13	24	13	541	58.4	7.66	67.84	13
13435603	0.031746	0.353216	1.06728	0.0939364	Hnrnpr	Hnrpr protein, partial [Mus musculus]	None	0	FALSE	11.361	5	3	6	3	601	67.1	8.9	14.56	3
13507244	0.015873	0.283682	0.960952	-0.0574632	Pccb	propionyl-CoA carboxylase beta chain [Mus musculus]	Master Protein Candidate	0	FALSE	65.008	35	13	24	13	541	58.4	7.47	67.84	13
13542680	0.0357143	0.395584	0.942718	-0.0851011	Tubb4b	Tubulin, beta 2C [Mus musculus]	Master Protein	0	FALSE	158.939	69	20	65	3	445	49.8	4.89	225.41	20
13542683	0.031746	0.353216	1.07717	0.107242	Uso1	Uso1 protein, partial [Mus musculus]	None	0	FALSE	26.042	24	6	8	6	335	37.7	4.68	24.07	6
13785552	0.0396825	0.428629	0.751886	-0.411414	Slco1a5	organic anion transporting polypeptide 3 [Mus musculus]	None	0	FALSE	14.014	5	3	7	3	670	74.8	7.94	22.41	3
13938017	0.00793651	0.283682	0.889328	-0.169212	Aqp1	Aqp1 protein [Mus musculus]	Master Protein	0	FALSE	5.015	6	2	4	2	269	28.8	7.43	8.31	2
13938051	0.00793651	0.283682	0.910714	-0.13493	Pdha1	Pyruvate dehydrogenase E1 alpha 1 [Mus musculus]	Master Protein	0	FALSE	40.214	35	11	15	11	390	43.2	8.19	38.15	11
14250361	0.031746	0.353216	0.953097	-0.0693045	Sars	Sars protein [Mus musculus]	Master Protein Candidate	0	FALSE	25.162	16	6	11	6	512	58.4	6.3	25.37	6
14318642	0.0285714	0.353216	1.11726	0.15997	Abcd3	ATP-binding cassette, sub-family D (ALD), member 3 [Mus musculus]	Master Protein Candidate	0	FALSE	72.443	26	14	30	14	659	75.4	9.26	84.39	14
14714615	0.0238095	0.353216	0.963228	-0.0540511	Hsp90b1	Heat shock protein 90, beta (Grp94), member 1 [Mus musculus]	Master Protein Candidate	0	FALSE	402.511	63	42	214	41	802	92.4	4.82	719.12	42
14714763	0.00793651	0.283682	1.27184	0.346922	Cyp3a11	Cytochrome P450, family 3, subfamily a, polypeptide 11 [Mus musculus]	Master Protein	0	FALSE	55.081	28	11	21	11	504	57.8	8.82	67.73	11
14789819	0.015873	0.283682	1.29564	0.373668	Igh-VJ558	Igh protein, partial [Mus musculus]	None	0	FALSE	13.114	13	3	3	3	480	51.9	5.2	11.53	3
14919404	0.00793651	0.283682	1.31488	0.39493	Sult1a1	Sulfotransferase family 1A, phenol-preferring, member 1 [Mus musculus]	None	0	FALSE	87.985	65	11	35	11	263	30.5	8.54	108.65	11
15029912	0.015873	0.283682	1.29564	0.373668	Igh-VJ558	Igh protein [Mus musculus]	None	0	FALSE	13.114	13	3	3	3	482	51.8	5.19	11.53	3
15215219	0.00793651	0.283682	1.09519	0.13118	Pon1	Paraoxonase 1 [Mus musculus]	Master Protein Candidate	0	FALSE	32.916	19	6	12	6	355	39.6	5.16	38.97	6
15277547	0.031746	0.353216	0.930674	-0.103652	Haao	3-hydroxyanthranilate 3,4-dioxygenase [Mus musculus]	Master Protein	0	FALSE	111.055	67	16	54	16	286	32.8	6.54	184.04	16
15487300	0.00793651	0.283682	0.922339	-0.11663	Acsm1	medium-chain acyl-CoA synthetase [Mus musculus]	Master Protein	0	FALSE	177.332	51	20	59	20	573	64.7	7.17	213.51	20
15488614	0.00793651	0.283682	1.17127	0.228075	Cyp2e1	Cytochrome P450, family 2, subfamily e, polypeptide 1 [Mus musculus]	Master Protein	0	FALSE	99.499	45	19	44	19	493	56.8	8.4	146.23	19
15488687	0.015873	0.283682	1.29564	0.373668	Igh-VJ558	Igh protein [Mus musculus]	None	0	FALSE	13.114	13	3	3	3	481	52.1	5.57	11.53	3
15488815	0.015873	0.283682	1.29564	0.373668	Igh-VJ558	Igh protein [Mus musculus]	None	0	FALSE	13.114	13	3	3	3	488	52.9	5.2	11.53	3
15489086	0.015873	0.283682	1.29564	0.373668	Igh-VJ558	Igh protein [Mus musculus]	None	0	FALSE	13.114	13	3	3	3	479	51.6	5.27	11.53	3
15593264	0.031746	0.353216	0.872659	-0.19651	Fgb	fibrinogen B-beta-chain, partial [Mus musculus]	None	0	FALSE	51.358	53	10	19	10	236	27	8.09	57.27	10
15667243	0.0396825	0.428629	0.570119	-0.810665	Hsd3b6	3 beta-hydroxysteroid dehydrogenase isomerase VI [Mus musculus]	None	0	FALSE	22.703	16	4	7	3	373	41.8	6.35	18	4
15679953	0.0238095	0.353216	0.95809	-0.0617674	Gnmt	Glycine N-methyltransferase [Mus musculus]	Master Protein Candidate	0	FALSE	150.125	68	12	65	12	293	32.7	7.2	254.45	12
15928397	0.015873	0.283682	0.887297	-0.172511	Prdx5	Prdx5 protein, partial [Mus musculus]	None	0	FALSE	37.85	78	5	18	5	89	9.6	5.38	63.76	5
15928472	0.015873	0.283682	1.11052	0.151229	Hmgcs2	3-hydroxy-3-methylglutaryl-Coenzyme A synthase 2 [Mus musculus]	Master Protein Candidate	0	FALSE	222.995	55	24	129	24	508	56.8	8.41	466.84	24
15986735	0.031746	0.353216	1.06728	0.0939364	Syncrip	RRM RNA binding protein NSAP1, partial [Mus musculus]	Master Protein Candidate	0	FALSE	21.67	10	5	8	5	558	62.6	9.23	20.33	5
16740769	0.015873	0.283682	0.946667	-0.0790716	Cyp2d22	Cytochrome P450, family 2, subfamily d, polypeptide 22 [Mus musculus]	Master Protein Candidate	0	FALSE	52.106	19	8	21	5	500	56.5	6.95	67.35	8
17017241	0.0396825	0.428629	0.950642	-0.0730265	Cald1	h-caldesmon, partial [Mus musculus]	None	0	FALSE	14.699	8	2	4	2	321	37.2	5.25	10.65	2
17390754	0.015873	0.283682	1.29564	0.373668	Igh-VJ558	Igh protein [Mus musculus]	None	0	FALSE	13.114	12	3	3	3	489	53.2	5.38	11.53	3
18043201	0.047619	0.450719	0.932945	-0.100137	Abhd14b	Abhydrolase domain containing 14b [Mus musculus]	None	0	FALSE	56.825	48	7	19	7	210	22.4	6.27	64.25	7
18043634	0.015873	0.283682	0.927368	-0.108785	Tmed5	Transmembrane emp24 protein transport domain containing 5 [Mus musculus]	Master Protein Candidate	0	FALSE	7.837	10	2	4	2	229	26.2	4.93	10.68	2
18043871	0.015873	0.283682	1.29564	0.373668	Igh-VJ558	Igh protein [Mus musculus]	None	0	FALSE	13.114	13	3	3	3	484	52.8	5.12	11.53	3
18044175	0.00793651	0.283682	0.935423	-0.0963098	Hyou1	Hyou1 protein [Mus musculus]	None	0	FALSE	127.402	42	15	48	15	504	56.5	9.44	167.74	15
18044474	0.00793651	0.283682	1.20365	0.267413	Cyp2c68	Cytochrome P450, family 2, subfamily c, polypeptide 68 [Mus musculus]	None	0	FALSE	26.308	13	6	11	6	491	55.9	7.21	31.04	6
18314665	0.031746	0.353216	0.945693	-0.0805564	Akr1c13	Aldo-keto reductase family 1, member C13 [Mus musculus]	None	0	FALSE	83.911	66	15	31	5	323	37	7.08	105.44	15
18381077	0.031746	0.353216	1.08487	0.117518	Uroc1	Urocanase domain containing 1 [Mus musculus]	None	0	FALSE	105.473	35	17	40	17	676	74.5	7.53	119.93	17
19353110	0.00793651	0.283682	0.950533	-0.0731907	Rpl10; Rpl10-ps1	Ribosomal protein 10 [Mus musculus]	Master Protein	0	FALSE	33.555	37	7	12	7	214	24.6	10.08	34.78	7
19354335	0.015873	0.283682	1.10578	0.145063	Slc27a2	Solute carrier family 27 (fatty acid transporter), member 2 [Mus musculus]	Master Protein	0	FALSE	140.518	40	19	49	19	620	70.4	8.9	157.76	19
19387963	0.015873	0.283682	0.919617	-0.120895	Ugt2a3	UDP glucuronosyltransferase 2 family, polypeptide A3 [Mus musculus]	Master Protein Candidate	0	FALSE	43.542	21	8	21	8	534	61.1	7.93	52.96	8
19483975	0.015873	0.283682	0.941349	-0.0871984	Eef1g	Eef1g protein [Mus musculus]	None	0	FALSE	62.292	44	14	32	14	317	36.9	7.42	83.45	14
19526848	0.00793651	0.283682	1.10011	0.137642	Marc2; Mosc2	mitochondrial amidoxime reducing component 2 isoform 1 precursor [Mus musculus]	Master Protein	0	FALSE	37.443	28	9	28	9	338	38.2	8.68	67.34	9
19852058	0.00793651	0.283682	0.947007	-0.0785532	Dscaml1	Down syndrome cell adhesion molecule-like protein, partial [Mus musculus]	None	0	FALSE	56.578	22	7	30	4	365	40.5	9.32	110.41	7
19880017	0.015873	0.283682	1.12967	0.175902	Acat3	acetyl CoA transferase-like protein [Mus musculus]	None	0	FALSE	105.832	58	13	34	13	397	41.4	7.72	120.95	13
20071589	0.015873	0.283682	1.12407	0.168735	Bdh1	Bdh1 protein, partial [Mus musculus]	None	0	FALSE	73.267	63	13	33	13	254	28.7	8.12	92.4	13
20071667	0.00793651	0.283682	1.15276	0.205096	Acadl	Acyl-Coenzyme A dehydrogenase, long-chain [Mus musculus]	Master Protein Candidate	0	FALSE	103.636	39	16	43	16	430	47.9	8.31	135.02	16
20379935	0.015873	0.283682	1.14807	0.199214	Hadh	Hadh protein, partial [Mus musculus]	Master Protein Candidate	0	FALSE	99.113	61	15	50	15	289	31.8	7.55	146.83	15
20379941	0.031746	0.353216	0.903955	-0.145677	Scfd1	Scfd1 protein [Mus musculus]	Master Protein Candidate	0	FALSE	7.323	9	4	5	4	575	65	5.44	6.34	4
20381029	0.015873	0.283682	1.20434	0.26824	Apoe	Apolipoprotein E [Mus musculus]	None	0	FALSE	62.853	41	12	26	12	311	35.8	5.68	79.39	12
20429722	0.00793651	0.283682	0.736981	-0.4403	Csad	cysteine sulfinic acid decarboxylase [Mus musculus]	None	0	FALSE	85.653	37	13	34	13	493	55.1	6.61	109.53	13
21594175	0.015873	0.283682	1.75264	0.809528	Mt2	Metallothionein 2 [Mus musculus]	Master Protein	0	FALSE	12.022	33	2	7	2	61	6.1	7.83	13.39	2
21594473	0.00793651	0.283682	0.766397	-0.383836	2810007J24Rik; Sult2a8	2810007J24Rik protein [Mus musculus]	Master Protein Candidate	0	FALSE	84.479	55	14	37	14	282	33.3	7.02	115.09	14
21618868	0.015873	0.283682	0.901559	-0.149505	Gstm6	Glutathione S-transferase, mu 6 [Mus musculus]	Master Protein Candidate	0	FALSE	46.547	48	10	33	6	218	25.6	6.24	93.52	10
21704140	0.031746	0.353216	0.94907	-0.0754143	Hibadh	3-hydroxyisobutyrate dehydrogenase, mitochondrial precursor [Mus musculus]	Master Protein	0	FALSE	41.232	30	5	10	5	335	35.4	8.13	40.55	5
21758044	0.015873	0.283682	1.1047	0.143656	Hmgcs2	unnamed protein product [Mus musculus]	None	0	FALSE	215.645	53	23	124	23	508	56.8	8.29	451.74	23
22653628	0.031746	0.353216	0.872587	-0.196629	Akr1a1	RecName: Full=Aldo-keto reductase family 1 member A1; AltName: Full=Alcohol dehydrogenase [NADP(+)]; AltName: Full=Aldehyde reductase; AltName: Full=Glucuronate reductase; AltName: Full=Glucuronolactone reductase	Master Protein	0	FALSE	113.038	66	19	53	19	325	36.6	7.39	170.74	19
22902450	0.015873	0.283682	1.04418	0.0623659	Pck1	Phosphoenolpyruvate carboxykinase 1, cytosolic [Mus musculus]	Master Protein	0	FALSE	160.983	56	26	68	26	622	69.3	6.6	216.06	26
23270912	0.015873	0.283682	0.947669	-0.077545	Aars	Alanyl-tRNA synthetase [Mus musculus]	Master Protein Candidate	0	FALSE	65.018	25	16	26	16	968	106.8	5.67	68.23	16
23274260	0.015873	0.283682	0.960952	-0.0574632	Pccb	Propionyl Coenzyme A carboxylase, beta polypeptide [Mus musculus]	None	0	FALSE	59.445	31	12	22	12	541	58.3	7.66	61.72	12
25955696	0.0396825	0.428629	0.570119	-0.810665	Hsd3b2	Hydroxy-delta-5-steroid dehydrogenase, 3 beta- and steroid delta-isomerase 2 [Mus musculus]	None	0	FALSE	20.573	10	3	6	2	373	42	6.54	15.98	3
26326179	0.015873	0.283682	0.875723	-0.191454	Gm5766	unnamed protein product [Mus musculus]	None	0	FALSE	8.349	11	2	4	2	206	23.2	10.08	10.41	2
26326319	0.015873	0.283682	1.04112	0.058141	Pck1	unnamed protein product [Mus musculus]	None	0	FALSE	158.723	55	25	66	25	622	69.3	6.65	211.12	25
26327721	0.031746	0.353216	0.964767	-0.0517478	Hsp90b1	unnamed protein product, partial [Mus musculus]	None	0	FALSE	308.341	61	31	164	31	615	71.4	4.84	541.06	31
26330244	0.031746	0.353216	1.06728	0.0939364	Syncrip	unnamed protein product [Mus musculus]	Master Protein Candidate	0	FALSE	21.67	10	5	8	5	562	62.6	7.56	20.33	5
26336489	0.015873	0.283682	0.947669	-0.077545	Aars	unnamed protein product [Mus musculus]	Master Protein Candidate	0	FALSE	65.018	25	16	26	16	968	106.9	5.67	68.23	16
26339872	0.031746	0.353216	0.962887	-0.0545622	Immt	unnamed protein product [Mus musculus]	None	0	FALSE	79.013	25	19	32	19	746	82.9	6.61	92.46	19
26340452	0.00793651	0.283682	1.07775	0.108028	Msra	unnamed protein product [Mus musculus]	Master Protein	0	FALSE	38.67	42	8	15	8	233	26	8.41	43.32	8
26341198	0.00793651	0.283682	0.874768	-0.193028	Cml2; Nat8f2	unnamed protein product [Mus musculus]	Master Protein	0	FALSE	15.434	9	2	6	2	238	26.4	9.58	15.53	2
26341802	0.031746	0.353216	1.08174	0.113355	Aldh3a2	unnamed protein product [Mus musculus]	None	0	FALSE	39.378	22	10	15	10	487	54.3	8.48	43.59	10
26343477	0.015873	0.283682	0.872521	-0.196738		unnamed protein product, partial [Mus musculus]	None	0	FALSE	13.148	18	2	6	2	183	20.8	6.54	12.5	2
26344712	0.015873	0.283682	1.08419	0.116616	Cat	unnamed protein product [Mus musculus]	Master Protein	0	FALSE	320.323	71	32	126	32	527	59.8	7.9	442.62	32
26344820	0.047619	0.450719	0.939182	-0.0905226	Gstz1	unnamed protein product [Mus musculus]	Master Protein	0	FALSE	121.105	73	11	55	11	216	24.3	7.85	206.03	11
26345604	0.015873	0.283682	1.14256	0.192264	Bdh1	unnamed protein product [Mus musculus]	Master Protein	0	FALSE	92.703	58	16	43	16	343	38.2	9.11	121.1	16
26347007	0.031746	0.353216	1.06728	0.0939364	Syncrip	unnamed protein product, partial [Mus musculus]	None	0	FALSE	16.508	9	4	7	4	491	54.9	9.1	17.97	4
26347027	0.031746	0.353216	0.94907	-0.0754143	Hibadh	unnamed protein product [Mus musculus]	Master Protein Candidate	0	FALSE	41.232	30	5	10	5	335	35.4	8.13	40.55	5
26347823	0.00793651	0.283682	0.445099	-1.1678	Gstp1	unnamed protein product, partial [Mus musculus]	None	0	FALSE	145.203	56	8	79	8	202	22.6	7.88	334.42	8
26349441	0.00793651	0.283682	0.889328	-0.169212	Aqp1	unnamed protein product [Mus musculus]	Master Protein Candidate	0	FALSE	5.015	6	2	4	2	269	28.8	7.43	8.31	2
26349713	0.00793651	0.283682	0.933398	-0.0994362	Gnmt	unnamed protein product [Mus musculus]	None	0	FALSE	36.772	55	3	16	3	69	7.6	7.28	63.53	3
26350783	0.015873	0.283682	0.977956	-0.0321587	Vcp	unnamed protein product [Mus musculus]	None	0	FALSE	216.016	60	31	73	31	723	80.1	5.24	235.78	31
26352005	0.031746	0.353216	1.08148	0.113009	Aldh3a2	unnamed protein product [Mus musculus]	Master Protein Candidate	0	FALSE	42.683	28	11	16	11	484	54	8.35	46.65	11
26352311	0.015873	0.283682	0.933023	-0.100015	Idh1	unnamed protein product [Mus musculus]	None	0	FALSE	219.955	74	29	106	29	422	47.5	6.93	367.7	29
26353038	0.031746	0.353216	1.07717	0.107242	Idh2	unnamed protein product [Mus musculus]	Master Protein	0	FALSE	106.004	49	21	47	21	452	50.9	8.69	144.27	21
26353084	0.015873	0.283682	0.967294	-0.0479731	Hsp90b1	unnamed protein product, partial [Mus musculus]	None	0	FALSE	126.271	73	13	63	12	277	31.5	4.77	223.23	13
26354278	0.031746	0.353216	1.0299	0.0424999	Glud1	unnamed protein product [Mus musculus]	None	0	FALSE	261.761	57	26	120	26	558	61.2	8.18	402.43	26
26355485	0.015873	0.283682	1.0841	0.116501	Ppp2cb	unnamed protein product, partial [Mus musculus]	None	0	FALSE	13.344	10	2	4	2	285	32.6	5.63	13.04	2
26355849	0.015873	0.283682	0.952144	-0.070749	Tubb4b	unnamed protein product, partial [Mus musculus]	None	0	FALSE	102.325	70	13	43	2	291	32.2	5.85	152.67	13
26361821	0.031746	0.353216	1.05729	0.0803734	Arpc2	unnamed protein product, partial [Mus musculus]	None	0	FALSE	6.054	13	2	2	2	191	22.2	7.64	3.76	2
26384542	0.031746	0.353216	1.12708	0.172594	Grn	unnamed protein product [Mus musculus]	Master Protein	0	FALSE	16.19	10	4	6	4	602	64.9	6.93	25.39	4
27694022	0.015873	0.283682	1.12288	0.167206	Bdh1	3-hydroxybutyrate dehydrogenase, type 1 [Mus musculus]	None	0	FALSE	85.282	55	15	38	15	343	38.3	9.01	107.51	15
27734554	0.0396825	0.428629	0.751886	-0.411414	Slco1a5	RecName: Full=Solute carrier organic anion transporter family member 1A5; AltName: Full=Organic anion-transporting polypeptide 3; Short=OATP-3; AltName: Full=Sodium-independent organic anion transporter 3; AltName: Full=Solute carrier family 21 member 7	None	0	FALSE	14.014	5	3	7	3	670	74.6	7.94	22.41	3
28277018	0.00793651	0.283682	1.0817	0.1133	Hsp90ab1	Hsp90ab1 protein, partial [Mus musculus]	None	0	FALSE	149.61	72	20	51	2	378	43.5	5.27	186.11	20
28386164	0.031746	0.353216	0.871373	-0.198637	Akr1a1	Aldo-keto reductase family 1, member A4 (aldehyde reductase) [Mus musculus]	None	0	FALSE	111.772	64	18	52	18	325	36.6	7.64	168.58	18
29144981	0.00793651	0.283682	1.0999	0.137367	Ctnna1	Catenin (cadherin associated protein), alpha 1 [Mus musculus]	Master Protein Candidate	0	FALSE	25.185	12	6	9	6	906	100	6.23	21.95	6
29165690	0.015873	0.283682	1.29564	0.373668	Igh-VJ558	Igh protein [Mus musculus]	None	0	FALSE	13.114	13	3	3	3	487	53	5.22	11.53	3
29427692	0.031746	0.353216	0.962887	-0.0545622	Immt	RecName: Full=MICOS complex subunit Mic60; AltName: Full=Mitochondrial inner membrane protein; AltName: Full=Mitofilin; Flags: Precursor	None	0	FALSE	79.013	25	19	32	19	757	83.8	6.61	92.46	19
29612561	0.00793651	0.283682	1.08425	0.116691	Hsp90ab1	Hsp90ab1 protein, partial [Mus musculus]	None	0	FALSE	136.352	69	19	47	2	363	41.7	5.07	169.94	19
29747953	0.00793651	0.283682	0.929825	-0.10497	Hyou1	Hypoxia up-regulated 1 [Mus musculus]	None	0	FALSE	230.53	42	30	91	30	999	111.2	5.27	300.54	30
29748000	0.00793651	0.283682	1.16284	0.217652	Slc25a22	Slc25a22 protein [Mus musculus]	None	0	FALSE	13.169	36	4	6	4	98	10.7	9.45	15.97	4
31324696	0.015873	0.283682	0.872611	-0.196589	Ugt1a6a	UDP glycosyltransferase 1 family polypeptide A7 [Mus musculus]	None	0	FALSE	45.537	18	7	25	2	531	60.4	8.69	80.41	7
31324698	0.015873	0.283682	0.874317	-0.193772	Ugt1a6b	UDP glycosyltransferase 1 family polypeptide A9 [Mus musculus]	Master Protein Candidate	0	FALSE	53.104	22	9	27	4	531	60.4	8.69	85.55	9
31419724	0.0396825	0.428629	0.570119	-0.810665	Hsd3b6	Hsd3b6 protein [Mus musculus]	None	0	FALSE	22.703	16	4	7	3	373	42	6.19	18	4
31542409	0.00793651	0.283682	0.874768	-0.193028	Cml2; Nat8f2	N-acetyltransferase family 8 member 2 [Mus musculus]	Master Protein Candidate	0	FALSE	15.434	9	2	6	2	238	26.4	9.58	15.53	2
31982520	0.00793651	0.283682	1.15276	0.205096	Acadl	long-chain specific acyl-CoA dehydrogenase, mitochondrial precursor [Mus musculus]	Master Protein Candidate	0	FALSE	103.636	39	16	43	16	430	47.9	8.15	135.02	16
31982861	0.00793651	0.283682	0.86351	-0.211716	Car3	carbonic anhydrase 3 [Mus musculus]	Master Protein Candidate	0	FALSE	247.273	89	20	127	20	260	29.3	7.37	448.91	20
32450737	0.00793651	0.283682	0.878352	-0.187128	Acadsb	Acyl-Coenzyme A dehydrogenase, short/branched chain [Mus musculus]	Master Protein Candidate	0	FALSE	40.262	26	7	9	7	432	47.8	7.87	33.39	7
32562908	0.00793651	0.283682	1.09257	0.127729	Cpox	coproporphyrinogen oxidase, partial [Mus musculus]	None	0	FALSE	6.602	7	2	6	2	144	15.4	10.92	5.51	2
33186906	0.015873	0.283682	0.872611	-0.196589	Ugt1a6a	UDP-glucuronosyltransferase 1-6 precursor [Mus musculus]	None	0	FALSE	49.349	19	8	26	3	531	60.4	8.62	82.46	8
33317937	0.047619	0.450719	1.03669	0.0519813	Hsp90ab1	heat shock protein 84b [Mus musculus]	Master Protein	0	FALSE	251.131	56	34	101	4	724	83.2	5.03	349.59	34
33356927	0.031746	0.353216	1.23785	0.307835		Chain A, Adipocyte Lipid-binding Protein	Master Protein Candidate	0	FALSE	8.098	15	2	4	2	131	14.5	8.4	11.68	2
33416526	0.031746	0.353216	1.06728	0.0939364	Syncrip	Syncrip protein, partial [Mus musculus]	Master Protein	0	FALSE	21.67	9	5	8	5	667	74.7	9.03	20.33	5
33468931	0.031746	0.353216	0.953097	-0.0693045	Sars	serine--tRNA ligase, cytoplasmic isoform 1 [Mus musculus]	Master Protein	0	FALSE	25.162	15	6	11	6	536	61.1	7.43	25.37	6
33563252	0.031746	0.353216	0.904947	-0.144095	Fga	fibrinogen alpha chain isoform 2 precursor [Mus musculus]	Master Protein Candidate	0	FALSE	90.717	38	15	33	15	557	61.3	7.47	103.05	15
33563266	0.00793651	0.283682	1.11534	0.157487	Ndufa4	cytochrome c oxidase subunit NDUFA4 [Mus musculus]	Master Protein	0	FALSE	21.395	45	4	15	4	82	9.3	9.52	45.73	4
34784416	0.015873	0.283682	1.29564	0.373668		Igh protein [Mus musculus]	None	0	FALSE	13.114	13	3	3	3	485	52.9	5.2	11.53	3
35193198	0.015873	0.283682	1.0841	0.116501	Ppp2cb	Ppp2cb protein [Mus musculus]	None	0	FALSE	13.344	9	2	4	2	309	35.6	5.43	13.04	2
35505439	0.015873	0.283682	1.18699	0.24731	Supt5; Supt5h	Supt5h protein, partial [Mus musculus]	Master Protein	0	FALSE	3.831	2	2	3	2	1098	122.1	5.1	4.93	2
37030032	0.00793651	0.283682	1.09257	0.127729	Cpox	coproporphyrinogen oxidase precursor, partial [Mus musculus]	None	0	FALSE	6.602	7	2	6	2	139	14.8	11.09	5.51	2
37573979	0.00793651	0.283682	0.94486	-0.0818278	Aars	Aars protein, partial [Mus musculus]	None	0	FALSE	43.288	22	8	16	8	507	55	6.2	46.58	8
37589144	0.031746	0.353216	1.06728	0.0939364	Syncrip	Syncrip protein, partial [Mus musculus]	Master Protein Candidate	0	FALSE	21.67	9	5	8	5	635	71.1	8.92	20.33	5
37589305	0.015873	0.283682	1.29564	0.373668	LOC544903	Igh protein [Mus musculus]	None	0	FALSE	13.114	13	3	3	3	485	52.4	5.27	11.53	3
37903407	0.015873	0.283682	0.947669	-0.077545	Aars	Alanyl-tRNA synthase [Mus musculus]	Master Protein Candidate	0	FALSE	65.018	25	16	26	16	968	106.9	5.62	68.23	16
38372554	0.015873	0.283682	0.890363	-0.167535	Tgoln2	RecName: Full=Trans-Golgi network integral membrane protein 2; AltName: Full=TGN38B; Flags: Precursor	Master Protein	0	FALSE	5.54	5	2	3	2	363	38.8	5.22	1.88	2
39979279	0.0396825	0.428629	0.570119	-0.810665	Hsd3b6	3beta-hydroxysteroid dehydrogenase VI [Mus musculus]	None	0	FALSE	22.703	16	4	7	3	373	41.9	6.19	18	4
40353068	0.00793651	0.283682	0.430014	-1.21754	Gstp2	Glutathione S-transferase, pi 2 [Mus musculus]	None	0	FALSE	104.329	38	5	63	5	210	23.5	7.87	275.84	5
42415475	0.031746	0.353216	0.951485	-0.071747	P4hb	protein disulfide-isomerase precursor [Mus musculus]	Master Protein Candidate	0	FALSE	325.07	71	33	200	24	509	57	4.88	737.73	33
44890285	0.031746	0.353216	1.06225	0.0871274	Ldha	Ldha protein [Mus musculus]	None	0	FALSE	66.986	81	8	28	8	104	11.2	5.45	101.21	8
46395611	0.015873	0.283682	0.944867	-0.0818169	Anp32a	RecName: Full=Acidic leucine-rich nuclear phosphoprotein 32 family member A; AltName: Full=Acidic nuclear phosphoprotein pp32; AltName: Full=Leucine-rich acidic nuclear protein; Short=LANP; AltName: Full=Potent heat-stable protein phosphatase 2A inhibitor I1PP2A	Master Protein Candidate	0	FALSE	38.281	37	8	15	8	247	28.5	4.07	43.29	8
47124127	0.015873	0.283682	0.872611	-0.196589	Ugt1a6a	Ugt1a6a protein [Mus musculus]	None	0	FALSE	49.349	19	8	26	3	531	60.4	8.56	82.46	8
48735214	0.015873	0.283682	0.700724	-0.513082	Slco1a6	Solute carrier organic anion transporter family, member 1a6 [Mus musculus]	None	0	FALSE	10.369	4	2	4	2	670	74.2	7.85	13.92	2
51873768	0.00793651	0.283682	0.784173	-0.350757	S100a8	S100 calcium binding protein A8 (calgranulin A) [Mus musculus]	Master Protein	0	FALSE	19.909	81	4	8	4	89	10.3	5.68	25.62	4
53734646	0.0357143	0.395584	0.942718	-0.0851011	Tubb4b	Tubulin, beta 2C [Mus musculus]	Master Protein Candidate	0	FALSE	158.939	69	20	65	3	445	49.8	4.89	225.41	20
55153945	0.015873	0.283682	1.29564	0.373668	LOC544903	Igh protein [Mus musculus]	None	0	FALSE	13.114	13	3	3	3	484	52	5.25	11.53	3
55154484	0.015873	0.283682	1.29564	0.373668	LOC544903	Igh protein [Mus musculus]	None	0	FALSE	13.114	13	3	3	3	483	52.7	5.06	11.53	3
55669638	0.0238095	0.353216	0.95809	-0.0617674		Chain C, Glycine N-methyltransferase	Master Protein Candidate	0	FALSE	150.125	68	12	65	12	292	32.5	7.44	254.45	12
56541260+G265G265A265:H266A265:H265AA265:K266	0.00793651	0.283682	0.950533	-0.0731907	Rpl10	Ribosomal protein 10 [Mus musculus]	None	0	FALSE	31.917	34	6	11	6	214	24.5	10.14	32.95	6
56789390	0.0238095	0.353216	1.0911	0.125783	Ech1	Enoyl coenzyme A hydratase 1, peroxisomal [Mus musculus]	Master Protein	0	FALSE	66.281	44	13	33	13	327	36.1	7.71	87.19	13
56971148	0.015873	0.283682	0.964859	-0.0516093	Gnmt	Glycine N-methyltransferase [Mus musculus]	None	0	FALSE	117.108	58	10	50	10	293	32.6	7.47	199.53	10
57242927	0.015873	0.283682	0.937558	-0.0930198	Idh1	Isocitrate dehydrogenase 1 (NADP+), soluble [Mus musculus]	Master Protein	0	FALSE	221.249	75	30	109	30	414	46.6	7.17	374.23	30
58037481	0.031746	0.353216	0.903955	-0.145677	Scfd1	sec1 family domain-containing protein 1 isoform 1 [Mus musculus]	Master Protein Candidate	0	FALSE	7.323	8	4	5	4	639	72.3	6.38	6.34	4
58477661	0.031746	0.353216	0.460265	-1.11946	Hsd3b3	Hydroxy-delta-5-steroid dehydrogenase, 3 beta- and steroid delta-isomerase 3 [Mus musculus]	None	0	FALSE	5.645	8	2	3	2	318	36.1	8.03	3.8	2
60218877	0.0285714	0.353216	1.11726	0.15997	Abcd3	ATP-binding cassette sub-family D member 3 isoform 1 [Mus musculus]	Master Protein Candidate	0	FALSE	72.443	26	14	30	14	659	75.4	9.26	84.39	14
62024603	0.015873	0.283682	1.29564	0.373668	LOC544903	Igh protein [Mus musculus]	None	0	FALSE	13.114	13	3	3	3	487	52.6	5.26	11.53	3
62027570	0.015873	0.283682	1.29564	0.373668		Igh protein [Mus musculus]	None	0	FALSE	13.114	13	3	3	3	485	52.3	5.34	11.53	3
62471425	0.015873	0.283682	1.29564	0.373668	LOC544903	Igh protein [Mus musculus]	None	0	FALSE	13.114	13	3	3	3	483	52.3	5.47	11.53	3
62739252	0.015873	0.283682	1.29564	0.373668	LOC544903	Igh protein [Mus musculus]	None	0	FALSE	13.114	13	3	3	3	483	52.1	5.27	11.53	3
62739262	0.00793651	0.283682	1.27184	0.346922	Cyp3a11	Cytochrome P450, family 3, subfamily a, polypeptide 11 [Mus musculus]	Master Protein Candidate	0	FALSE	55.081	28	11	21	11	504	57.8	8.82	67.73	11
66267550	0.031746	0.353216	0.966303	-0.0494521	Eprs	Eprs protein, partial [Mus musculus]	Master Protein Candidate	0	FALSE	53.542	13	15	21	15	1477	166.4	7.91	47.61	15
66396647	0.015873	0.283682	1.29564	0.373668	LOC544903	Igh protein [Mus musculus]	None	0	FALSE	13.114	13	3	3	3	483	52.4	5.55	11.53	3
66794516	0.015873	0.283682	1.29564	0.373668	LOC544903	Igh protein [Mus musculus]	None	0	FALSE	13.114	13	3	3	3	476	51.4	5.15	11.53	3
71042009	0.0285714	0.353216	1.16251	0.217248		Chain A, Crystal Structure Of The 22kda N-Terminal Fragment Of Mouse Apolipoprotein E	None	0	FALSE	24.707	25	4	8	4	181	21	5.53	26.76	4
71051070	0.031746	0.353216	1.05729	0.0803734	Arpc2	Arpc2 protein, partial [Mus musculus]	None	0	FALSE	7.379	11	3	4	3	276	31.6	8	3.76	3
71059753	0.015873	0.283682	1.20434	0.26824	Apoe	Apoe [Mus musculus]	Master Protein Candidate	0	FALSE	65.192	43	13	28	13	311	35.8	5.67	84.56	13
74138198	0.015873	0.283682	1.13778	0.186225	Ndufs5; BC002163; LOC100504968; LOC102641315	unnamed protein product [Mus musculus]	Master Protein Candidate	0	FALSE	11.113	29	3	4	3	106	12.6	8.92	9.92	3
74138251	0.015873	0.283682	0.912488	-0.132123	Hspa5	unnamed protein product [Mus musculus]	Master Protein	0	FALSE	435.395	63	40	260	37	655	72.4	5.16	944.67	40
74139525	0.00793651	0.283682	0.934888	-0.0971342	Nme2	unnamed protein product [Mus musculus]	Master Protein	0	FALSE	82.971	72	9	40	6	152	17.4	7.5	159.33	9
74139849	0.031746	0.353216	0.953097	-0.0693045	Sars	unnamed protein product [Mus musculus]	Master Protein Candidate	0	FALSE	25.162	16	6	11	6	512	58.3	6.3	25.37	6
74139882	0.015873	0.283682	1.08884	0.122793	Ptma	unnamed protein product [Mus musculus]	Master Protein Candidate	0	FALSE	24.966	22	3	9	3	111	12.3	3.84	29.47	3
74140682	0.00793651	0.283682	1.24267	0.313442	Ywhah	unnamed protein product [Mus musculus]	Master Protein Candidate	0	FALSE	40.447	43	11	22	6	246	28.2	4.89	59.24	11
74141454	0.031746	0.353216	1.06728	0.0939364	Hnrnpr	unnamed protein product, partial [Mus musculus]	None	0	FALSE	11.361	8	3	6	3	381	42.6	6.04	14.56	3
74141913	0.015873	0.283682	1.14807	0.199214	Hadh	unnamed protein product [Mus musculus]	Master Protein Candidate	0	FALSE	99.113	56	15	50	15	314	34.5	8.65	146.83	15
74141920	0.031746	0.353216	0.951485	-0.071747	P4hb	unnamed protein product [Mus musculus]	Master Protein Candidate	0	FALSE	325.07	71	33	200	24	509	57.1	4.88	737.73	33
74142231	0.0285714	0.353216	1.11726	0.15997	Abcd3	unnamed protein product [Mus musculus]	Master Protein Candidate	0	FALSE	72.443	26	14	30	14	659	75.3	9.22	84.39	14
74144071	0.015873	0.283682	0.955238	-0.0660677	Pccb	unnamed protein product [Mus musculus]	None	0	FALSE	60.827	34	12	22	12	505	55	8.16	61.45	12
74144350	0.031746	0.353216	0.964767	-0.0517478	Hsp90b1	unnamed protein product [Mus musculus]	None	0	FALSE	309.575	66	32	165	32	612	70.9	5.38	541.06	32
74144701	0.015873	0.283682	1.08884	0.122793	Ptma	unnamed protein product, partial [Mus musculus]	Master Protein Candidate	0	FALSE	24.966	14	3	9	3	171	18.6	4.13	29.47	3
74146205	0.015873	0.283682	0.465318	-1.10371	Cyp7b1	unnamed protein product [Mus musculus]	Master Protein Candidate	0	FALSE	13.463	8	3	6	3	507	58.5	8.95	16.27	3
74146235	0.031746	0.353216	1.08384	0.116158	Uroc1	unnamed protein product [Mus musculus]	Master Protein	0	FALSE	109.734	35	18	41	18	710	78.4	7.27	123.11	18
74146368	0.031746	0.353216	1.11667	0.159199	Mat1a	unnamed protein product [Mus musculus]	Master Protein	0	FALSE	152.461	54	15	59	15	396	43.5	5.82	199.6	15
74146419	0.015873	0.283682	1.21618	0.282363	Apoe	unnamed protein product [Mus musculus]	None	0	FALSE	59.126	39	12	26	12	311	35.9	5.68	76.56	12
74146454	0.00793651	0.283682	0.928092	-0.10766	Acsm1	unnamed protein product, partial [Mus musculus]	None	0	FALSE	130.128	43	16	45	16	531	60	6.48	160.45	16
74146613	0.015873	0.283682	1.11711	0.159769	Acly	unnamed protein product [Mus musculus]	None	0	FALSE	130.621	31	31	58	31	1091	119.5	7.55	160.9	31
74147026	0.031746	0.353216	1.03665	0.0519278	Hsp90ab1	unnamed protein product [Mus musculus]	None	0	FALSE	234.433	50	32	96	4	724	83.2	5.06	329.48	32
74147584	0.00793651	0.283682	0.889328	-0.169212	Aqp1	unnamed protein product [Mus musculus]	Master Protein Candidate	0	FALSE	5.015	6	2	4	2	269	28.8	7.84	8.31	2
74149659	0.0238095	0.353216	0.938477	-0.0916074	P4hb	unnamed protein product, partial [Mus musculus]	None	0	FALSE	244.031	70	24	151	24	385	43	5.14	558.51	24
74151965	0.031746	0.353216	1.16109	0.215485	Grn	unnamed protein product [Mus musculus]	None	0	FALSE	8.316	5	2	3	2	602	64.9	6.93	13.58	2
74152795	0.00793651	0.283682	0.928919	-0.106375	Hyou1	unnamed protein product [Mus musculus]	Master Protein	0	FALSE	253.097	48	33	96	33	999	111.1	5.21	321.56	33
74177661	0.031746	0.353216	1.04184	0.0591292	Hnrnpm	unnamed protein product [Mus musculus]	None	0	FALSE	22.094	11	6	7	6	679	72	8.12	15.48	6
74178001	0.031746	0.353216	1.12708	0.172594	Grn	unnamed protein product [Mus musculus]	Master Protein Candidate	0	FALSE	16.19	10	4	6	4	589	63.5	6.8	25.39	4
74178174	0.0238095	0.353216	0.963228	-0.0540511	Hsp90b1	unnamed protein product [Mus musculus]	Master Protein	0	FALSE	402.715	63	42	215	41	802	92.4	4.82	721.42	42
74178217	0.015873	0.283682	1.20434	0.26824	Apoe	unnamed protein product [Mus musculus]	Master Protein Candidate	0	FALSE	65.192	43	13	28	13	311	35.9	5.68	84.56	13
74178750	0.00793651	0.283682	1.13376	0.181113	Cpox	unnamed protein product [Mus musculus]	None	0	FALSE	24.854	14	5	11	5	380	42.3	8.78	21.15	5
74180730	0.015873	0.283682	1.12967	0.175902	Acat3	unnamed protein product [Mus musculus]	None	0	FALSE	105.832	58	13	34	13	397	41.4	7.94	120.95	13
74180774	0.00793651	0.283682	0.914972	-0.1282	Lactb2	unnamed protein product [Mus musculus]	Master Protein	0	FALSE	42.432	36	8	17	8	288	32.7	6.33	57.63	8
74182445	0.015873	0.283682	0.465318	-1.10371	Cyp7b1	unnamed protein product [Mus musculus]	Master Protein Candidate	0	FALSE	13.463	10	3	6	3	421	48.5	7.5	16.27	3
74183518	0.015873	0.283682	1.0447	0.0630867	Glud1	unnamed protein product, partial [Mus musculus]	None	0	FALSE	180.247	68	16	76	16	326	35.8	7.34	268.14	16
74184263	0.0285714	0.353216	1.11726	0.15997	Abcd3	unnamed protein product [Mus musculus]	Master Protein Candidate	0	FALSE	72.443	26	14	30	14	659	75.4	9.26	84.39	14
74184280	0.031746	0.353216	1.09606	0.132329	Slc27a2	unnamed protein product, partial [Mus musculus]	None	0	FALSE	121.809	36	17	40	17	614	69.8	8.78	131.54	17
74185113	0.031746	0.353216	1.02188	0.0312187	Ak2	unnamed protein product [Mus musculus]	Master Protein Candidate	0	FALSE	102.063	62	10	36	10	232	25.6	7.42	135.44	10
74188015	0.031746	0.353216	1.10288	0.141282	Fmo5	unnamed protein product, partial [Mus musculus]	None	0	FALSE	41.548	44	11	20	11	252	28.4	7.87	55.97	11
74190076	0.031746	0.353216	0.952522	-0.0701753	P4hb	unnamed protein product [Mus musculus]	None	0	FALSE	320.282	69	32	195	23	509	57	4.88	723.45	32
74191270	0.015873	0.283682	1.06211	0.0869356	Ctsd	unnamed protein product [Mus musculus]	None	0	FALSE	44.659	25	9	20	9	410	44.9	7.15	61.19	9
74191385	0.015873	0.283682	1.08884	0.122793	Ptma	unnamed protein product, partial [Mus musculus]	Master Protein Candidate	0	FALSE	24.966	14	3	9	3	171	18.5	4.13	29.47	3
74191486	0.031746	0.353216	1.12708	0.172594	Grn	unnamed protein product [Mus musculus]	Master Protein Candidate	0	FALSE	16.19	10	4	6	4	602	65	6.99	25.39	4
74192146	0.00793651	0.283682	0.928919	-0.106375	Hyou1	unnamed protein product [Mus musculus]	Master Protein Candidate	0	FALSE	253.097	48	33	96	33	999	111.1	5.19	321.56	33
74192673	0.015873	0.283682	1.08419	0.116616	Cat	unnamed protein product [Mus musculus]	Master Protein Candidate	0	FALSE	320.323	71	32	126	32	527	59.8	7.88	442.62	32
74193793	0.015873	0.283682	0.872521	-0.196738	Psma2	unnamed protein product [Mus musculus]	Master Protein	0	FALSE	23.519	26	4	9	4	247	27.5	8.22	22.03	4
74193815	0.031746	0.353216	0.88447	-0.177115	Prdx5	unnamed protein product, partial [Mus musculus]	Master Protein Candidate	0	FALSE	78.498	63	10	36	10	199	20.7	8.78	131.7	10
74194838	0.031746	0.353216	1.06728	0.0939364	Hnrnpr	unnamed protein product [Mus musculus]	None	0	FALSE	11.361	5	3	6	3	632	70.9	8.13	14.56	3
74195675	0.015873	0.283682	0.933086	-0.0999188	Idh1	unnamed protein product [Mus musculus]	None	0	FALSE	203.941	71	28	103	28	414	46.6	7.43	353.81	28
74195796	0.015873	0.283682	1.08884	0.122793	Ptma	unnamed protein product, partial [Mus musculus]	Master Protein	0	FALSE	24.966	14	3	9	3	172	18.7	4.13	29.47	3
74195800	0.031746	0.353216	1.05729	0.0803734	Arpc2	unnamed protein product, partial [Mus musculus]	Master Protein	0	FALSE	11.617	10	4	5	4	383	42.5	9.06	6.91	4
74196486	0.00793651	0.283682	0.940171	-0.089005	Aars	unnamed protein product [Mus musculus]	None	0	FALSE	61.058	23	15	25	15	968	106.8	5.67	63.89	15
74196989	0.031746	0.353216	1.12708	0.172594	Grn	unnamed protein product [Mus musculus]	Master Protein Candidate	0	FALSE	16.19	10	4	6	4	589	63.4	6.92	25.39	4
74197037	0.015873	0.283682	1.15615	0.209324	Apoe	unnamed protein product [Mus musculus]	None	0	FALSE	61.403	40	12	26	12	311	35.8	5.54	78.46	12
74197062	0.015873	0.283682	1.05502	0.0772651	Rps18	unnamed protein product [Mus musculus]	Master Protein Candidate	0	FALSE	18.413	29	5	12	5	152	17.7	11.09	36.06	5
74197999	0.031746	0.353216	1.12708	0.172594	Grn	unnamed protein product [Mus musculus]	Master Protein Candidate	0	FALSE	16.19	10	4	6	4	589	63.4	6.74	25.39	4
74198293	0.015873	0.283682	0.911591	-0.133541	Hspa5	unnamed protein product [Mus musculus]	None	0	FALSE	416.377	60	39	252	36	655	72.4	5.22	909.14	39
74198312	0.031746	0.353216	0.951485	-0.071747	P4hb	unnamed protein product [Mus musculus]	Master Protein Candidate	0	FALSE	325.07	71	33	200	24	509	57.1	4.88	737.73	33
74198706	0.047619	0.450719	0.95441	-0.0673185	P4hb	unnamed protein product [Mus musculus]	None	0	FALSE	305.208	67	32	190	23	509	57	4.86	692.17	32
74198883	0.031746	0.353216	1.12708	0.172594	Grn	unnamed protein product, partial [Mus musculus]	Master Protein Candidate	0	FALSE	16.19	10	4	6	4	593	63.9	6.93	25.39	4
74198974	0.015873	0.283682	0.912488	-0.132123	Hspa5	unnamed protein product [Mus musculus]	Master Protein Candidate	0	FALSE	435.395	63	40	260	37	655	72.4	5.16	944.67	40
74200030	0.015873	0.283682	1.14471	0.19498	Acadm	unnamed protein product, partial [Mus musculus]	None	0	FALSE	27.849	20	4	13	4	234	25.6	7.66	41.58	4
74200069	0.015873	0.283682	0.937683	-0.0928285	Calr	unnamed protein product, partial [Mus musculus]	None	0	FALSE	233.832	74	20	114	20	368	42.2	4.74	406.19	20
74200346	0.015873	0.283682	0.890363	-0.167535	Tgoln1	unnamed protein product [Mus musculus]	Master Protein Candidate	0	FALSE	5.54	5	2	3	2	353	37.8	5.34	1.88	2
74204023	0.015873	0.283682	1.11825	0.161238	Acly	unnamed protein product, partial [Mus musculus]	None	0	FALSE	111.776	29	29	52	29	1034	113	7.77	143.22	29
74204639	0.031746	0.353216	1.12708	0.172594	Grn	unnamed protein product [Mus musculus]	Master Protein Candidate	0	FALSE	16.19	10	4	6	4	602	65	6.99	25.39	4
74204822	0.031746	0.353216	0.962887	-0.0545622	Immt	unnamed protein product [Mus musculus]	None	0	FALSE	75.518	24	18	31	18	741	82.4	6.7	89.79	18
74204830	0.031746	0.353216	1.08419	0.116616	Cat	unnamed protein product [Mus musculus]	None	0	FALSE	299.339	68	30	120	30	527	59.7	7.88	420.89	30
74205095	0.015873	0.283682	1.03452	0.0489584	Rps4y2; Rps4l	unnamed protein product [Mus musculus]	None	0	FALSE	52.817	36	11	29	11	262	29.2	10.27	71.19	11
74205677	0.015873	0.283682	0.92998	-0.104728	Hdlbp	unnamed protein product [Mus musculus]	Master Protein Candidate	0	FALSE	112.953	27	24	34	24	1268	141.7	6.87	108.54	24
74206030	0.015873	0.283682	1.14256	0.192264	Bdh1	unnamed protein product [Mus musculus]	Master Protein Candidate	0	FALSE	92.703	58	16	43	16	343	38.3	9.01	121.1	16
74207436	0.031746	0.353216	1.06728	0.0939364	Hnrnpr	unnamed protein product [Mus musculus]	None	0	FALSE	11.361	5	3	6	3	632	70.8	8.13	14.56	3
74207451	0.031746	0.353216	1.12708	0.172594	Grn	unnamed protein product [Mus musculus]	Master Protein Candidate	0	FALSE	16.19	10	4	6	4	602	65	6.87	25.39	4
74208163	0.015873	0.283682	0.890363	-0.167535	Tgoln2	unnamed protein product [Mus musculus]	Master Protein Candidate	0	FALSE	5.54	5	2	3	2	363	38.8	5.22	1.88	2
74209271	0.0396825	0.428629	0.570119	-0.810665	Hsd3b6	unnamed protein product [Mus musculus]	None	0	FALSE	22.703	16	4	7	3	373	42	6.35	18	4
74210124	0.015873	0.283682	1.11711	0.159769	Acly	unnamed protein product [Mus musculus]	Master Protein Candidate	0	FALSE	132.014	31	32	59	32	1101	120.7	7.44	160.9	32
74210592	0.031746	0.353216	0.941884	-0.0863791	Asl	unnamed protein product [Mus musculus]	Master Protein Candidate	0	FALSE	145.961	46	19	68	19	464	51.7	6.96	229.01	19
74211311	0.031746	0.353216	1.04447	0.0627675	Tuba1a	unnamed protein product [Mus musculus]	None	0	FALSE	125.431	43	15	46	4	451	50	5.06	175.43	15
74211686	0.031746	0.353216	0.951485	-0.071747	P4hb	unnamed protein product, partial [Mus musculus]	Master Protein Candidate	0	FALSE	325.07	71	33	200	24	505	56.6	4.89	737.73	33
74212047	0.015873	0.283682	1.14807	0.199214	Hadh	unnamed protein product [Mus musculus]	Master Protein Candidate	0	FALSE	99.113	56	15	50	15	314	34.5	8.65	146.83	15
74212071	0.00793651	0.283682	0.950533	-0.0731907	Rpl10	unnamed protein product [Mus musculus]	Master Protein Candidate	0	FALSE	33.555	37	7	12	7	214	24.6	10.01	34.78	7
74212231	0.031746	0.353216	0.951485	-0.071747	P4hb	unnamed protein product [Mus musculus]	Master Protein Candidate	0	FALSE	325.07	71	33	200	24	509	57.1	4.88	737.73	33
74212487	0.031746	0.353216	0.953097	-0.0693045	Sars	unnamed protein product [Mus musculus]	Master Protein Candidate	0	FALSE	25.162	16	6	11	6	511	58.2	6.3	25.37	6
74212599	0.0396825	0.428629	0.946757	-0.0789339	Eif4a1	unnamed protein product [Mus musculus]	None	0	FALSE	43.874	42	9	19	5	286	33	6.44	66.78	9
74212911	0.00793651	0.283682	0.941233	-0.087376	Hyou1	unnamed protein product, partial [Mus musculus]	None	0	FALSE	207.349	49	26	71	26	812	90.3	5.27	245.72	26
74213406	0.047619	0.450719	0.942995	-0.0846777	Dhrs1	unnamed protein product [Mus musculus]	None	0	FALSE	33.896	29	7	10	7	313	34	8.41	26.72	7
74213457	0.031746	0.353216	1.01434	0.0205474	Ctsb	unnamed protein product [Mus musculus]	Master Protein Candidate	0	FALSE	46.705	27	7	16	7	339	37.3	6.02	56.2	7
74213510	0.031746	0.353216	1.12708	0.172594	Grn	unnamed protein product [Mus musculus]	Master Protein Candidate	0	FALSE	16.19	10	4	6	4	589	63.3	6.87	25.39	4
74213772	0.031746	0.353216	1.12708	0.172594	Grn	unnamed protein product, partial [Mus musculus]	None	0	FALSE	12.736	11	3	5	3	462	49.6	6.51	21.07	3
74213903	0.031746	0.353216	1.12708	0.172594	Grn	unnamed protein product [Mus musculus]	Master Protein Candidate	0	FALSE	16.19	10	4	6	4	602	65	7.05	25.39	4
74213943	0.015873	0.283682	0.947669	-0.077545	Aars	unnamed protein product [Mus musculus]	Master Protein Candidate	0	FALSE	65.018	25	16	26	16	968	106.8	5.72	68.23	16
74214172	0.031746	0.353216	1.07717	0.107242	Uso1	unnamed protein product [Mus musculus]	None	0	FALSE	26.042	22	6	8	6	353	39.8	4.69	24.07	6
74217226	0.031746	0.353216	1.03992	0.0564699	Anxa6	unnamed protein product [Mus musculus]	None	0	FALSE	109.209	46	20	41	19	556	62.3	5.36	135.97	20
74219109	0.031746	0.353216	1.06728	0.0939364	Hnrnpr	unnamed protein product, partial [Mus musculus]	None	0	FALSE	11.361	5	3	6	3	610	68.4	9.06	14.56	3
74219123	0.00793651	0.283682	0.928919	-0.106375	Hyou1	unnamed protein product [Mus musculus]	Master Protein Candidate	0	FALSE	253.097	48	33	96	33	999	111.1	5.19	321.56	33
74219263	0.015873	0.283682	0.949102	-0.0753653	Nucb2	unnamed protein product [Mus musculus]	Master Protein Candidate	0	FALSE	40.384	22	8	16	8	420	50.3	5.15	45.69	8
74219772	0.015873	0.283682	0.940255	-0.0888766	P4hb	unnamed protein product [Mus musculus]	None	0	FALSE	307.076	68	31	187	24	509	57	4.86	690.96	31
74219812	0.00793651	0.283682	1.0999	0.137367	Ctnna1	unnamed protein product [Mus musculus]	Master Protein Candidate	0	FALSE	25.185	12	6	9	6	906	100	6.23	21.95	6
74219835	0.015873	0.283682	1.11966	0.163058	Phyh	unnamed protein product [Mus musculus]	Master Protein Candidate	0	FALSE	18.868	15	5	7	5	338	38.6	7.53	20.45	5
74220199	0.015873	0.283682	0.908555	-0.138355	Hspa5	unnamed protein product, partial [Mus musculus]	None	0	FALSE	399.01	62	38	236	35	619	68.5	5.26	835.77	38
74220322	0.015873	0.283682	0.96484	-0.0516388	Immt	unnamed protein product [Mus musculus]	None	0	FALSE	63.723	21	16	29	16	741	82.5	6.79	81.64	16
74220419	0.031746	0.353216	1.12708	0.172594	Grn	unnamed protein product [Mus musculus]	Master Protein Candidate	0	FALSE	16.19	10	4	6	4	602	65	6.99	25.39	4
74220471	0.015873	0.283682	1.08378	0.116073	Aldh3a2	unnamed protein product [Mus musculus]	None	0	FALSE	35.481	25	9	13	9	484	54	8.35	36.79	9
74220649	0.031746	0.353216	0.951389	-0.0718929	P4hb	unnamed protein product [Mus musculus]	None	0	FALSE	282.069	65	32	183	23	509	57.1	4.88	644.95	32
74220848	0.031746	0.353216	0.88447	-0.177115	Prdx5	unnamed protein product, partial [Mus musculus]	Master Protein Candidate	0	FALSE	78.498	60	10	36	10	208	21.6	8.66	131.7	10
74222619	0.015873	0.283682	1.11966	0.163058	Phyh	unnamed protein product [Mus musculus]	Master Protein Candidate	0	FALSE	18.868	15	5	7	5	338	38.6	7.53	20.45	5
74223714	0.0238095	0.353216	1.0853	0.118098	Cat	unnamed protein product [Mus musculus]	None	0	FALSE	307.483	67	31	121	31	526	59.7	7.88	418.91	31
74224797	0.031746	0.353216	0.933526	-0.0992379	Mdh1	unnamed protein product [Mus musculus]	None	0	FALSE	123.26	43	15	62	15	334	36.5	6.93	207.15	15
74225230	0.015873	0.283682	0.872521	-0.196738	Psma2	unnamed protein product [Mus musculus]	Master Protein Candidate	0	FALSE	23.519	28	4	9	4	234	25.9	7.43	22.03	4
74225915	0.0285714	0.353216	1.22748	0.295703	Apoe	unnamed protein product, partial [Mus musculus]	None	0	FALSE	12.503	15	2	3	2	158	18	4.63	10.09	2
74226780	0.031746	0.353216	0.872587	-0.196629	Akr1a1	unnamed protein product [Mus musculus]	Master Protein Candidate	0	FALSE	113.038	66	19	53	19	325	36.6	7.39	170.74	19
74227675	0.031746	0.353216	0.938477	-0.0916074	Calr	unnamed protein product [Mus musculus]	Master Protein Candidate	0	FALSE	242.289	67	22	119	22	416	48	4.5	413.06	22
74228775	0.031746	0.353216	1.06728	0.0939364	Hnrnpr	unnamed protein product, partial [Mus musculus]	None	0	FALSE	11.361	5	3	6	3	604	67.6	8.9	14.56	3
74228849	0.031746	0.353216	1.0841	0.116501	Cat	unnamed protein product [Mus musculus]	None	0	FALSE	315.304	69	31	122	31	527	59.8	8.07	431.01	31
76779882	0.015873	0.283682	1.29564	0.373668		Igh protein [Mus musculus]	None	0	FALSE	13.114	13	3	3	3	479	51.7	5.12	11.53	3
77020262	0.031746	0.353216	1.02188	0.0312187	Ak2	adenylate kinase 2, mitochondrial isoform a [Mus musculus]	Master Protein	0	FALSE	102.063	60	10	36	10	239	26.5	7.39	135.44	10
77415525	0.015873	0.283682	1.20021	0.263281	Cyp2c67	Cytochrome P450, family 2, subfamily c, polypeptide 67 [Mus musculus]	Master Protein Candidate	0	FALSE	29.824	15	7	12	7	491	56.1	7.36	33.05	7
80474423	0.015873	0.283682	1.29564	0.373668		Igh protein [Mus musculus]	None	0	FALSE	13.114	13	3	3	3	482	52	5.55	11.53	3
82568928	0.031746	0.353216	0.954825	-0.0666911	Immt	Immt protein, partial [Mus musculus]	None	0	FALSE	57.792	33	14	24	14	440	50.1	6.04	70.22	14
82617575	0.031746	0.353216	0.966303	-0.0494521	Eprs	bifunctional glutamate/proline--tRNA ligase isoform 1 [Mus musculus]	Master Protein Candidate	0	FALSE	53.542	13	15	21	15	1512	170	7.66	47.61	15
83405895	0.015873	0.283682	1.29564	0.373668	Igh-VJ558	Unknown (protein for MGC:118134) [Mus musculus]	None	0	FALSE	13.114	13	3	3	3	482	52.1	5.55	11.53	3
86577658	0.015873	0.283682	1.29564	0.373668		Igh protein [Mus musculus]	None	0	FALSE	13.114	13	3	3	3	486	53	5.08	11.53	3
86577822	0.00793651	0.283682	1.35267	0.435808	Cyp3a16	Cytochrome P450, family 3, subfamily a, polypeptide 16 [Mus musculus]	None	0	FALSE	14.67	10	5	10	5	504	57.9	7.39	29.63	5
89573965	0.015873	0.283682	0.934562	-0.0976374	Idh1	isocitrate dehydrogenase 1, partial [Mus musculus]	None	0	FALSE	197.62	73	25	92	25	378	42.6	6.38	324.98	25
90651989	0.0285714	0.353216	1.13333	0.180572	Hist1h1b	Hist1h1b protein, partial [Mus musculus]	Master Protein Candidate	0	FALSE	30.337	26	6	20	3	222	22.4	10.92	41.22	6
92087001	0.015873	0.283682	0.947835	-0.0772927	Mdh1	RecName: Full=Malate dehydrogenase, cytoplasmic; AltName: Full=Cytosolic malate dehydrogenase	Master Protein Candidate	0	FALSE	130.788	45	16	67	16	334	36.5	6.58	223.64	16
92110223	0.031746	0.353216	1.05729	0.0803734	Arpc2	Actin related protein 2/3 complex, subunit 2 [Mus musculus]	Master Protein Candidate	0	FALSE	11.617	13	4	5	4	300	34.3	7.36	6.91	4
109732102	0.031746	0.353216	1.09473	0.130571	Slc27a5	Solute carrier family 27 (fatty acid transporter), member 5 [Mus musculus]	None	0	FALSE	49.816	19	9	15	9	689	76.1	8.48	44.17	9
111038118	0.015873	0.283682	1.14807	0.199214	Hadh	hydroxyacyl-coenzyme A dehydrogenase, mitochondrial precursor [Mus musculus]	Master Protein	0	FALSE	99.113	56	15	50	15	314	34.4	8.65	146.83	15
111183380	0.00793651	0.283682	1.16261	0.217368	Cyp2e1	cytochrome P450 2E1 [Mus musculus]	None	0	FALSE	58.046	37	12	33	12	333	38.1	9.51	112.43	12
113680667	0.031746	0.353216	0.681329	-0.553577	Hsd3b5	NADPH-dependent 3-keto-steroid reductase Hsd3b5 [Mus musculus]	Master Protein	0	FALSE	23.792	15	5	5	4	373	41.9	9.01	15.38	5
118505329	0.015873	0.283682	1.11457	0.156489	Bdh1	3-hydroxybutyrate dehydrogenase, partial [Mus musculus]	None	0	FALSE	39.049	67	4	11	4	105	12.1	6.77	38.5	4
118600805	0.015873	0.283682	0.960952	-0.0574632	Pccb	Pccb protein, partial [Mus musculus]	None	0	FALSE	59.445	31	12	22	12	539	58.1	7.66	61.72	12
119507488	0.031746	0.353216	0.94907	-0.0754143	Hibadh	3-hydroxyisobutyrate dehydrogenase [Mus musculus]	None	0	FALSE	27.037	17	4	8	4	334	35.5	8.63	32.88	4
123228993	0.00793651	0.283682	0.950533	-0.0731907	Rpl10	ribosomal protein 10, partial [Mus musculus]	Master Protein Candidate	0	FALSE	33.555	40	7	12	7	201	23.1	10.01	34.78	7
124376120	0.015873	0.283682	1.11352	0.155126	Ccbl2; Kyat3	Cysteine conjugate-beta lyase 2 [Mus musculus]	Master Protein Candidate	0	FALSE	63.832	37	13	30	12	420	47.3	7.2	95.88	13
126031449	0.00793651	0.283682	0.442222	-1.17716		Chain B, Glutathione S-transferase P 1	Master Protein	0	FALSE	154.541	59	9	89	9	209	23.4	7.96	366.01	9
126031451	0.00793651	0.283682	0.442222	-1.17716		Chain B, Glutathione S-transferase P 1	Master Protein Candidate	0	FALSE	154.541	59	9	89	9	209	23.4	7.96	366.01	9
127799069	0.031746	0.353216	1.06728	0.0939364	Syncrip	Synaptotagmin binding, cytoplasmic RNA interacting protein [Mus musculus]	Master Protein Candidate	0	FALSE	21.67	10	5	8	5	562	62.6	7.56	20.33	5
127801712	0.031746	0.353216	1.06728	0.0939364	Syncrip	Syncrip protein [Mus musculus]	Master Protein Candidate	0	FALSE	21.67	10	5	8	5	561	62.5	7.56	20.33	5
133777006	0.00793651	0.283682	1.13376	0.181113	Cpox	Coproporphyrinogen oxidase [Mus musculus]	Master Protein Candidate	0	FALSE	29.33	19	6	12	6	354	40.6	7.3	23.72	6
148665334	0.015873	0.283682	1.12288	0.167206	Bdh1	3-hydroxybutyrate dehydrogenase, type 1, partial [Mus musculus]	None	0	FALSE	85.282	60	15	38	15	315	35.2	8.53	107.51	15
148665768	0.00793651	0.283682	1.11253	0.15384	Cpox	coproporphyrinogen oxidase [Mus musculus]	None	0	FALSE	22.887	13	5	10	5	427	47.8	8.75	18.39	5
148666071	0.031746	0.353216	0.936963	-0.0939364	Pdia6	protein disulfide isomerase associated 6, isoform CRA_a [Mus musculus]	None	0	FALSE	93.397	31	10	49	10	414	45.5	8.53	157.43	10
148666072	0.031746	0.353216	0.936963	-0.0939364	Pdia6	protein disulfide isomerase associated 6, isoform CRA_b, partial [Mus musculus]	None	0	FALSE	93.397	32	10	49	10	400	43.7	6.99	157.43	10
148666539	0.031746	0.353216	0.962887	-0.0545622	Immt	inner membrane protein, mitochondrial, isoform CRA_b [Mus musculus]	None	0	FALSE	75.518	23	18	31	18	774	86.2	7.42	89.79	18
148666704	0.015873	0.283682	0.931	-0.103147	Spr	sepiapterin reductase, isoform CRA_a [Mus musculus]	None	0	FALSE	23.263	34	3	6	3	126	12.9	8.1	20.02	3
148666813	0.00793651	0.283682	1.12202	0.166103	Cnbp	cellular nucleic acid binding protein, isoform CRA_b [Mus musculus]	None	0	FALSE	18.978	30	4	10	4	140	15.4	8.19	19.31	4
148666814	0.00793651	0.283682	1.12202	0.166103	Cnbp	cellular nucleic acid binding protein, isoform CRA_c, partial [Mus musculus]	None	0	FALSE	18.978	28	4	10	4	149	16.4	7.8	19.31	4
148666816	0.00793651	0.283682	1.12202	0.166103	Cnbp	cellular nucleic acid binding protein, isoform CRA_e, partial [Mus musculus]	None	0	FALSE	18.978	30	4	10	4	142	15.6	7.8	19.31	4
148666867	0.031746	0.353216	1.08487	0.117518	Uroc1	urocanase domain containing 1 [Mus musculus]	None	0	FALSE	105.473	35	17	40	17	676	74.5	7.4	119.93	17
148666881	0.015873	0.283682	1.24432	0.315363		mCG130432, partial [Mus musculus]	None	0	FALSE	22.4	30	4	8	4	128	14.9	9.57	26.86	4
148667258	0.031746	0.353216	0.93666	-0.0944022		mCG132196, isoform CRA_b [Mus musculus]	None	0	FALSE	44.89	10	11	19	11	1420	159.3	6.67	54.77	11
148667807	0.031746	0.353216	0.906588	-0.141481	Idh1	isocitrate dehydrogenase 1 (NADP+), soluble, isoform CRA_b, partial [Mus musculus]	None	0	FALSE	45.414	44	5	18	5	137	15.4	6.76	63.62	5
148667825	0.00793651	0.283682	1.15276	0.205096		mCG121561 [Mus musculus]	Master Protein	0	FALSE	103.636	39	16	43	16	430	47.9	8.15	135.02	16
148667893	0.031746	0.353216	1.05729	0.0803734		mCG114810, isoform CRA_b [Mus musculus]	None	0	FALSE	7.379	11	3	4	3	284	32.5	8.02	3.76	3
148668546	0.015873	0.283682	1.05502	0.0772651	Gm10260	mCG114988 [Mus musculus]	Master Protein	0	FALSE	18.413	29	5	12	5	152	17.7	10.86	36.06	5
148669985	0.015873	0.283682	0.901559	-0.149505		mCG21728, isoform CRA_c [Mus musculus]	Master Protein	0	FALSE	46.547	45	10	33	6	232	27.3	5.91	93.52	10
148670021	0.031746	0.353216	0.953097	-0.0693045	Sars	seryl-aminoacyl-tRNA synthetase, isoform CRA_a, partial [Mus musculus]	Master Protein Candidate	0	FALSE	25.162	16	6	11	6	515	58.7	6.57	25.37	6
148670079	0.015873	0.283682	1.15276	0.205096		mCG16689, isoform CRA_b [Mus musculus]	None	0	FALSE	39.302	32	6	16	6	264	27.9	8.1	62.03	6
148670080	0.015873	0.283682	1.15276	0.205096		mCG16689, isoform CRA_c [Mus musculus]	None	0	FALSE	39.302	33	6	16	6	257	27.5	7.55	62.03	6
148670084	0.015873	0.283682	1.12939	0.175539		mCG16687, isoform CRA_c [Mus musculus]	None	0	FALSE	55.338	52	8	21	8	248	26.2	7.53	77.54	8
148670085	0.015873	0.283682	1.11429	0.156119		mCG16687, isoform CRA_d [Mus musculus]	None	0	FALSE	108.997	63	13	34	13	345	36	8.35	125.74	13
148670086	0.031746	0.353216	1.10976	0.150243		mCG16687, isoform CRA_e [Mus musculus]	None	0	FALSE	98.263	55	10	27	10	349	36.1	6.98	102.69	10
148670087	0.015873	0.283682	1.11758	0.160381		mCG16687, isoform CRA_f [Mus musculus]	Master Protein	0	FALSE	116.996	63	14	36	14	397	41.4	7.72	133.04	14
148670365	0.015873	0.283682	1.07343	0.102234	Aldob	aldolase 2, B isoform, isoform CRA_b, partial [Mus musculus]	None	0	FALSE	154.568	76	14	68	13	277	30	7.69	274.52	14
148670367	0.031746	0.353216	1.06129	0.0858194	Aldob	aldolase 2, B isoform, isoform CRA_d, partial [Mus musculus]	None	0	FALSE	83.264	53	10	55	10	173	19.1	8.78	164.88	10
148670608	0.015873	0.283682	1.11711	0.159769	Acly	ATP citrate lyase, isoform CRA_a [Mus musculus]	Master Protein	0	FALSE	132.014	31	32	59	32	1102	120.9	7.34	160.9	32
148670609	0.015873	0.283682	1.11711	0.159769	Acly	ATP citrate lyase, isoform CRA_b [Mus musculus]	Master Protein Candidate	0	FALSE	132.014	32	32	59	32	1091	119.7	7.44	160.9	32
148670809	0.015873	0.283682	1.26391	0.337888		mCG4926, partial [Mus musculus]	None	0	FALSE	15.628	12	4	7	4	332	36	9.04	18.15	4
148670978	0.047619	0.450719	0.939182	-0.0905226	Gstz1	glutathione transferase zeta 1 (maleylacetoacetate isomerase), isoform CRA_c [Mus musculus]	Master Protein Candidate	0	FALSE	121.105	73	11	55	11	215	24.2	7.24	206.03	11
148670980	0.031746	0.353216	0.936191	-0.0951245	Gstz1	glutathione transferase zeta 1 (maleylacetoacetate isomerase), isoform CRA_b [Mus musculus]	None	0	FALSE	106.528	90	10	48	10	161	18	7.28	182.24	10
148672056	0.00793651	0.283682	0.738095	-0.438121	Csad	cysteine sulfinic acid decarboxylase, isoform CRA_a [Mus musculus]	Master Protein	0	FALSE	94.117	42	14	36	14	493	55.1	6.61	119.15	14
148672557	0.015873	0.283682	0.946667	-0.0790716		mCG20388, isoform CRA_a, partial [Mus musculus]	Master Protein	0	FALSE	52.106	18	8	21	5	528	59.5	7.87	67.35	8
148673185	0.00793651	0.283682	0.86351	-0.211716	Car3	carbonic anhydrase 3, isoform CRA_b [Mus musculus]	Master Protein	0	FALSE	247.273	84	20	127	20	276	31.2	8.24	448.91	20
148674683	0.015873	0.283682	1.08887	0.122827	Pck1	phosphoenolpyruvate carboxykinase 1, cytosolic, isoform CRA_a [Mus musculus]	None	0	FALSE	84.539	61	14	36	14	308	34.7	6.06	105.64	14
148674684	0.015873	0.283682	1.1062	0.145617	Pck1	phosphoenolpyruvate carboxykinase 1, cytosolic, isoform CRA_b [Mus musculus]	None	0	FALSE	56.08	56	9	26	9	163	19	7.06	78.57	9
148674685	0.031746	0.353216	1.03783	0.0535665	Pck1	phosphoenolpyruvate carboxykinase 1, cytosolic, isoform CRA_c [Mus musculus]	None	0	FALSE	127.778	57	21	56	21	505	56.5	6.07	174.13	21
148675086	0.0238095	0.353216	1.10907	0.149352	Idh2	isocitrate dehydrogenase 2 (NADP+), mitochondrial, isoform CRA_b, partial [Mus musculus]	None	0	FALSE	33.744	35	6	17	6	192	21.1	7.05	50.9	6
148675792	0.047619	0.450719	1.06413	0.089672		mCG50233, isoform CRA_a, partial [Mus musculus]	None	0	FALSE	33.946	33	7	14	7	214	25	5.82	37.04	7
148675793	0.047619	0.450719	1.06413	0.089672		mCG50233, isoform CRA_b, partial [Mus musculus]	None	0	FALSE	29.027	33	6	13	6	174	20.1	5.85	32.96	6
148675902	0.00793651	0.283682	0.91376	-0.130113	Mdh1	malate dehydrogenase 1, NAD (soluble), isoform CRA_a, partial [Mus musculus]	None	0	FALSE	17.476	15	2	7	2	143	15.4	4.59	21.63	2
148675903	0.015873	0.283682	0.835116	-0.259952	Mdh1	malate dehydrogenase 1, NAD (soluble), isoform CRA_b, partial [Mus musculus]	None	0	FALSE	18.638	35	3	15	3	80	9.1	4.81	48.45	3
148675904	0.015873	0.283682	0.947835	-0.0772927	Mdh1	malate dehydrogenase 1, NAD (soluble), isoform CRA_c, partial [Mus musculus]	Master Protein	0	FALSE	130.788	41	16	67	16	366	40	7.33	223.64	16
148676005	0.00793651	0.283682	1.12752	0.173158	Phyh	phytanoyl-CoA hydroxylase, isoform CRA_b, partial [Mus musculus]	None	0	FALSE	16.277	16	4	6	4	266	30.4	6.95	17.88	4
148676266	0.015873	0.283682	0.95776	-0.0622634		mCG20287 [Mus musculus]	None	0	FALSE	135.412	73	16	50	3	354	39.3	5.31	179.94	16
148676642	0.031746	0.353216	1.12108	0.164884		mCG18564, isoform CRA_d [Mus musculus]	None	0	FALSE	8.94	18	2	8	2	88	9.4	10.1	21.84	2
148676670	0.015873	0.283682	0.908284	-0.138785	Hspa5	heat shock 70kD protein 5 (glucose-regulated protein), isoform CRA_b [Mus musculus]	None	0	FALSE	320.886	64	33	196	32	507	56.3	5.14	707.02	33
148677865	0.0396825	0.428629	1.0836	0.115829	Rps14	mCG6028, isoform CRA_a [Mus musculus]	Master Protein	0	FALSE	30.143	38	5	14	5	151	16.3	10.05	48.31	5
148677934	0.00793651	0.283682	0.888681	-0.170262	Aldh7a1	aldehyde dehydrogenase family 7, member A1, isoform CRA_c [Mus musculus]	None	0	FALSE	78.454	46	8	21	8	266	28.5	6.9	77.68	8
148677935	0.00793651	0.283682	0.888681	-0.170262	Aldh7a1	aldehyde dehydrogenase family 7, member A1, isoform CRA_d [Mus musculus]	None	0	FALSE	78.454	37	8	21	8	333	36.2	8.44	77.68	8
148677936	0.00793651	0.283682	0.888681	-0.170262	Aldh7a1	aldehyde dehydrogenase family 7, member A1, isoform CRA_a [Mus musculus]	None	0	FALSE	78.454	40	8	21	8	305	33	6.98	77.68	8
148678284	0.015873	0.283682	1.05502	0.0772651		mCG23000, isoform CRA_a [Mus musculus]	Master Protein Candidate	0	FALSE	18.413	43	5	12	5	103	12.1	9.99	36.06	5
148679283	0.015873	0.283682	1.04098	0.0579473		mCG141694 [Mus musculus]	None	0	FALSE	29.773	16	4	11	4	408	46.1	5.83	38.7	4
148679537	0.015873	0.283682	0.947669	-0.077545	Aars	alanyl-tRNA synthetase, isoform CRA_a, partial [Mus musculus]	Master Protein	0	FALSE	65.018	23	16	26	16	1055	116.5	6.1	68.23	16
148680100	0.00793651	0.283682	1.08669	0.119937	Ccbl2; Kyat3	cysteine conjugate-beta lyase 2, isoform CRA_c [Mus musculus]	None	0	FALSE	24.585	33	6	12	5	187	21.3	8.4	34.74	6
148680101	0.015873	0.283682	1.11352	0.155126	Ccbl2; Kyat3	cysteine conjugate-beta lyase 2, isoform CRA_d, partial [Mus musculus]	Master Protein Candidate	0	FALSE	63.832	37	13	30	12	421	47.4	7.43	95.88	13
148680102	0.015873	0.283682	1.11352	0.155126	Ccbl2; Kyat3	cysteine conjugate-beta lyase 2, isoform CRA_e [Mus musculus]	Master Protein	0	FALSE	63.832	34	13	30	12	455	51.1	8.37	95.88	13
148680153	0.015873	0.283682	1.13964	0.188583	Adh1	alcohol dehydrogenase 1 (class I), isoform CRA_a [Mus musculus]	None	0	FALSE	118.31	66	13	63	13	257	27.2	8.59	228.46	13
148680154	0.031746	0.353216	1.12655	0.171906	Adh1	alcohol dehydrogenase 1 (class I), isoform CRA_b [Mus musculus]	None	0	FALSE	159.088	74	18	97	18	335	35.3	7.87	350.16	18
148680345	0.015873	0.283682	1.08884	0.122793	Gm4617	mCG124913 [Mus musculus]	Master Protein Candidate	0	FALSE	24.966	22	3	9	3	110	12.1	3.8	29.47	3
148680385	0.0285714	0.353216	1.11726	0.15997	Abcd3	ATP-binding cassette, sub-family D (ALD), member 3, isoform CRA_b, partial [Mus musculus]	Master Protein	0	FALSE	72.443	25	14	30	14	685	77.9	9.26	84.39	14
148680575	0.015873	0.283682	1.04472	0.06311	Acadvl	acyl-Coenzyme A dehydrogenase, very long chain, isoform CRA_b [Mus musculus]	None	0	FALSE	71.039	33	11	26	11	418	45.8	9.04	94.43	11
148682024	0.00793651	0.283682	1.09519	0.13118	Pon1	paraoxonase 1, isoform CRA_a [Mus musculus]	Master Protein Candidate	0	FALSE	32.916	19	6	12	6	355	39.5	5.22	38.97	6
148682335	0.015873	0.283682	0.867701	-0.204731	Adhfe1	alcohol dehydrogenase, iron containing, 1, isoform CRA_b [Mus musculus]	Master Protein	0	FALSE	8.85	5	2	4	2	465	49.9	7.58	11.4	2
148682378	0.031746	0.353216	0.931163	-0.102895	Lactb2	lactamase, beta 2, isoform CRA_a, partial [Mus musculus]	None	0	FALSE	36.773	33	7	14	7	261	29.9	5.9	46.37	7
148682379	0.031746	0.353216	0.931163	-0.102895	Lactb2	lactamase, beta 2, isoform CRA_b, partial [Mus musculus]	None	0	FALSE	36.773	30	7	14	7	284	32.4	5.77	46.37	7
148683476	0.031746	0.353216	0.904947	-0.144095	Fga	fibrinogen, alpha polypeptide, isoform CRA_a [Mus musculus]	Master Protein	0	FALSE	90.717	27	15	33	15	789	87.3	6.11	103.05	15
148683477	0.031746	0.353216	0.904947	-0.144095	Fga	fibrinogen, alpha polypeptide, isoform CRA_b, partial [Mus musculus]	Master Protein Candidate	0	FALSE	90.717	37	15	33	15	574	63.1	7.3	103.05	15
148684154	0.015873	0.283682	0.909453	-0.136929	Lasp1	LIM and SH3 protein 1, isoform CRA_a [Mus musculus]	None	0	FALSE	8.59	13	2	3	2	227	25.8	6.52	10.64	2
148684319	0.031746	0.353216	1.06196	0.0867233		mCG21672 [Mus musculus]	None	0	FALSE	89.545	29	11	45	11	296	32.8	9.5	150.89	11
148685163	0.015873	0.283682	0.949102	-0.0753653	Nucb2	nucleobindin 2, isoform CRA_c [Mus musculus]	None	0	FALSE	30.516	18	7	14	7	411	49.2	5.2	36.56	7
148685227	0.015873	0.283682	0.919431	-0.121186	Acsm1	acyl-CoA synthetase medium-chain family member 1 [Mus musculus]	None	0	FALSE	150.98	46	19	54	19	573	64.7	7.17	181.71	19
148685462	0.00793651	0.283682	1.31027	0.389862	Sult1a1	sulfotransferase family 1A, phenol-preferring, member 1, isoform CRA_b [Mus musculus]	Master Protein	0	FALSE	97.934	62	13	37	13	316	36.6	8.1	115.77	13
148685766	0.015873	0.283682	0.896422	-0.15775	Acadsb	acyl-Coenzyme A dehydrogenase, short/branched chain, isoform CRA_a, partial [Mus musculus]	None	0	FALSE	33.439	20	6	7	6	480	53.5	8.38	24.55	6
148685994	0.015873	0.283682	1.16318	0.218069	Cyp2e1	cytochrome P450, family 2, subfamily e, polypeptide 1, isoform CRA_a [Mus musculus]	None	0	FALSE	15.457	30	4	10	4	123	14	10.2	31.2	4
148685995	0.0238095	0.353216	1.2016	0.264961	Cyp2e1	cytochrome P450, family 2, subfamily e, polypeptide 1, isoform CRA_b [Mus musculus]	None	0	FALSE	25.84	37	7	17	7	167	19.2	10.21	48	7
148685996	0.015873	0.283682	1.12286	0.167182	Cyp2e1	cytochrome P450, family 2, subfamily e, polypeptide 1, isoform CRA_c [Mus musculus]	None	0	FALSE	44.081	34	10	24	10	307	35	8.98	87.54	10
148685997	0.015873	0.283682	1.16318	0.218069	Cyp2e1	cytochrome P450, family 2, subfamily e, polypeptide 1, isoform CRA_d [Mus musculus]	None	0	FALSE	15.457	30	4	10	4	123	14	10.2	31.2	4
148685999	0.015873	0.283682	1.13262	0.179664	Cyp2e1	cytochrome P450, family 2, subfamily e, polypeptide 1, isoform CRA_f [Mus musculus]	None	0	FALSE	81.59	48	13	30	13	356	41	6.3	107.42	13
148686113	0.031746	0.353216	1.09141	0.126193	Taldo1	transaldolase 1, isoform CRA_b [Mus musculus]	None	0	FALSE	15.408	18	2	7	2	105	11.5	5.48	20.93	2
148686115	0.031746	0.353216	1.09141	0.126193	Taldo1	transaldolase 1, isoform CRA_d [Mus musculus]	None	0	FALSE	15.408	13	2	7	2	148	16.1	7.09	20.93	2
148686128	0.015873	0.283682	1.17583	0.233686	Slc25a22	solute carrier family 25 (mitochondrial carrier, glutamate), member 22, isoform CRA_b [Mus musculus]	None	0	FALSE	15.312	27	4	5	4	217	23	8.47	13.2	4
148686130	0.015873	0.283682	1.17583	0.233686	Slc25a22	solute carrier family 25 (mitochondrial carrier, glutamate), member 22, isoform CRA_d, partial [Mus musculus]	None	0	FALSE	15.312	23	4	5	4	256	27.6	9.32	13.2	4
148686131	0.015873	0.283682	1.17583	0.233686	Slc25a22	solute carrier family 25 (mitochondrial carrier, glutamate), member 22, isoform CRA_e, partial [Mus musculus]	None	0	FALSE	15.312	20	4	5	4	289	30.7	8.32	13.2	4
148686133	0.00793651	0.283682	1.15729	0.210753	Slc25a22	solute carrier family 25 (mitochondrial carrier, glutamate), member 22, isoform CRA_f [Mus musculus]	None	0	FALSE	14.596	22	5	7	5	195	21.5	10.17	17.91	5
148686998	0.015873	0.283682	1.1232	0.167619	Rpl31-ps1	mCG50210 [Mus musculus]	None	0	FALSE	8.559	20	3	7	3	125	14.4	10.52	20.36	3
148687033	0.00793651	0.283682	1.35267	0.435808		mCG17264, partial [Mus musculus]	None	0	FALSE	14.67	10	5	10	5	522	59.9	7.93	29.63	5
148687536	0.031746	0.353216	0.941884	-0.0863791	Asl	argininosuccinate lyase, isoform CRA_a [Mus musculus]	Master Protein	0	FALSE	145.961	46	19	68	19	464	51.7	6.96	229.01	19
148688187	0.015873	0.283682	0.927368	-0.108785	Tmed5	transmembrane emp24 protein transport domain containing 5, isoform CRA_a [Mus musculus]	Master Protein	0	FALSE	7.837	10	2	4	2	229	26.2	4.93	10.68	2
148689088	0.015873	0.283682	0.960952	-0.0574632	Pccb	propionyl Coenzyme A carboxylase, beta polypeptide, isoform CRA_a [Mus musculus]	None	0	FALSE	59.445	31	12	22	12	541	58.3	7.66	61.72	12
148689194	0.047619	0.450719	0.932945	-0.100137	Abhd14b	abhydrolase domain containing 14b, isoform CRA_b [Mus musculus]	None	0	FALSE	56.825	46	7	19	7	218	23.2	6.27	64.25	7
148691229	0.015873	0.283682	1.18804	0.248588	Apoe	apolipoprotein E, isoform CRA_a, partial [Mus musculus]	None	0	FALSE	42.923	33	8	16	8	235	26.9	4.92	45.9	8
148691232	0.015873	0.283682	1.22727	0.295456	Apoe	apolipoprotein E, isoform CRA_d, partial [Mus musculus]	None	0	FALSE	19.99	28	4	7	4	154	17.5	4.68	20.55	4
148691233	0.031746	0.353216	1.15955	0.213566	Apoe	apolipoprotein E, isoform CRA_e [Mus musculus]	None	0	FALSE	40.485	57	9	20	9	155	17.6	5.25	57.8	9
148691234	0.015873	0.283682	1.20434	0.26824	Apoe	apolipoprotein E, isoform CRA_f [Mus musculus]	Master Protein Candidate	0	FALSE	65.192	56	13	28	13	238	27.4	8.92	84.56	13
148692868	0.0238095	0.353216	1.05858	0.0821326	Hacl1	2-hydroxyacyl-CoA lyase 1, partial [Mus musculus]	Master Protein	0	FALSE	95.577	34	16	34	16	587	64.4	6.54	98.38	16
148692928	0.0238095	0.353216	1.04167	0.0588937	Glud1	glutamate dehydrogenase 1 [Mus musculus]	Master Protein Candidate	0	FALSE	278.05	68	27	126	27	490	54.2	7.8	427.71	27
148693639	0.015873	0.283682	0.939566	-0.0899342	Hyou1	hypoxia up-regulated 1, isoform CRA_b, partial [Mus musculus]	None	0	FALSE	68.289	43	10	24	10	332	37.2	9.39	72.36	10
148693677	0.047619	0.450719	1.07089	0.0988123		mCG1549, isoform CRA_b, partial [Mus musculus]	Master Protein Candidate	0	FALSE	11.361	27	2	9	2	104	11.5	9.74	32.63	2
148693959	0.015873	0.283682	1.09479	0.130656	Cox5a	cytochrome c oxidase, subunit Va [Mus musculus]	Master Protein	0	FALSE	46.107	53	5	22	5	146	16.1	6.54	76.92	5
148694165	0.015873	0.283682	0.938175	-0.0920715	Ppib	peptidylprolyl isomerase B, isoform CRA_b [Mus musculus]	Master Protein	0	FALSE	53.7	47	11	35	10	216	23.7	9.55	100.21	11
148694192	0.031746	0.353216	0.857019	-0.222601	Lactb	lactamase, beta [Mus musculus]	Master Protein	0	FALSE	6.145	5	2	3	2	551	60.7	8.9	7.64	2
148694588	0.031746	0.353216	1.06728	0.0939364		mCG16769, isoform CRA_b [Mus musculus]	Master Protein Candidate	0	FALSE	21.67	19	5	8	5	299	33	7.09	20.33	5
148694589	0.031746	0.353216	1.06728	0.0939364	Syncrip	mCG16769, isoform CRA_a [Mus musculus]	Master Protein Candidate	0	FALSE	21.67	9	5	8	5	623	69.6	8.59	20.33	5
148694590	0.031746	0.353216	1.06728	0.0939364		mCG16769, isoform CRA_c, partial [Mus musculus]	Master Protein Candidate	0	FALSE	21.67	9	5	8	5	612	68.5	8.78	20.33	5
148695312	0.031746	0.353216	0.920039	-0.120232	Prdx6b	mCG48959 [Mus musculus]	None	0	FALSE	18.681	13	3	19	3	224	25	6.37	46.35	3
148695749	0.031746	0.353216	1.08841	0.122228	Cat	catalase, isoform CRA_a [Mus musculus]	None	0	FALSE	114.99	78	12	45	12	176	19.7	9.09	150.27	12
148696210	0.015873	0.283682	1.09869	0.135785	Slc27a2	solute carrier family 27 (fatty acid transporter), member 2 [Mus musculus]	None	0	FALSE	123.903	37	16	42	16	577	65.5	8.88	139.41	16
148698428	0.015873	0.283682	1.13778	0.186225		mCG5769, isoform CRA_b, partial [Mus musculus]	Master Protein Candidate	0	FALSE	11.113	28	3	4	3	112	13.3	8.97	9.92	3
148698648	0.015873	0.283682	0.874275	-0.193842	Akr1a1	aldo-keto reductase family 1, member A4 (aldehyde reductase) [Mus musculus]	None	0	FALSE	82.497	66	16	42	16	272	30.2	6.84	129.27	16
148699321	0.015873	0.283682	0.967199	-0.0481149	Isoc2a	mCG20913 [Mus musculus]	Master Protein	0	FALSE	60.103	62	8	26	8	206	22.4	8.02	95.13	8
148699630	0.031746	0.353216	1.12929	0.17542	Gamt	guanidinoacetate methyltransferase, isoform CRA_a [Mus musculus]	None	0	FALSE	23.884	20	3	6	3	298	32.9	7.08	29.5	3
148700275	0.031746	0.353216	0.962598	-0.054994	Gdi2	guanosine diphosphate (GDP) dissociation inhibitor 2, isoform CRA_a, partial [Mus musculus]	None	0	FALSE	54.608	35	8	18	8	351	39.3	9.06	61.69	8
148700464	0.015873	0.283682	1.05502	0.0772651	Gm11361	mCG116671 [Mus musculus]	Master Protein Candidate	0	FALSE	18.413	29	5	12	5	152	17.7	10.86	36.06	5
148701031	0.031746	0.353216	0.894784	-0.160388	Acy3	aspartoacylase (aminoacylase) 3, isoform CRA_b [Mus musculus]	None	0	FALSE	9.983	18	3	4	3	311	34.3	5.48	13.04	3
148701033	0.031746	0.353216	0.894784	-0.160388	Acy3	aspartoacylase (aminoacylase) 3, isoform CRA_c [Mus musculus]	None	0	FALSE	9.983	18	3	4	3	317	34.7	5.83	13.04	3
148701042	0.00793651	0.283682	1.15056	0.202338	Ndufv1	NADH dehydrogenase (ubiquinone) flavoprotein 1, isoform CRA_a [Mus musculus]	None	0	FALSE	29.241	31	6	6	6	334	36.3	6.44	18.63	6
148701044	0.00793651	0.283682	0.445099	-1.1678		mCG3869, isoform CRA_a [Mus musculus]	None	0	FALSE	145.203	59	8	79	8	193	21.6	7.44	334.42	8
148701047	0.00793651	0.283682	0.426769	-1.22847		mCG140529, isoform CRA_b [Mus musculus]	None	0	FALSE	55.063	22	3	36	3	194	21.5	8.79	157.75	3
148701683	0.031746	0.353216	1.10428	0.1431	Ppp2ca	protein phosphatase 2 (formerly 2A), catalytic subunit, alpha isoform, isoform CRA_b [Mus musculus]	Master Protein	0	FALSE	15.549	12	3	5	3	309	35.6	5.54	14.92	3
148701846	0.031746	0.353216	0.971055	-0.042375		mCG19408 [Mus musculus]	None	0	FALSE	32.155	13	7	10	4	615	69.3	8.69	25.31	7
148702182	0.031746	0.353216	1.16109	0.215485	Grn	granulin, isoform CRA_a [Mus musculus]	None	0	FALSE	8.316	8	2	3	2	434	46.6	6.76	13.58	2
148702183	0.031746	0.353216	1.12708	0.172594	Grn	granulin, isoform CRA_b [Mus musculus]	Master Protein Candidate	0	FALSE	16.19	13	4	6	4	472	51	6.95	25.39	4
148702184	0.031746	0.353216	1.12708	0.172594	Grn	granulin, isoform CRA_c [Mus musculus]	Master Protein Candidate	0	FALSE	16.19	11	4	6	4	566	60.9	6.9	25.39	4
148702185	0.031746	0.353216	1.12708	0.172594	Grn	granulin, isoform CRA_d [Mus musculus]	Master Protein Candidate	0	FALSE	16.19	11	4	6	4	569	61.3	6.86	25.39	4
148702187	0.031746	0.353216	1.12708	0.172594	Grn	granulin, isoform CRA_e [Mus musculus]	Master Protein Candidate	0	FALSE	16.19	10	4	6	4	589	63.4	6.8	25.39	4
148702818	0.031746	0.353216	0.951485	-0.071747	P4hb	prolyl 4-hydroxylase, beta polypeptide, isoform CRA_a [Mus musculus]	Master Protein Candidate	0	FALSE	325.07	68	33	200	24	528	59	4.88	737.73	33
148702819	0.031746	0.353216	0.951485	-0.071747	P4hb	prolyl 4-hydroxylase, beta polypeptide, isoform CRA_b, partial [Mus musculus]	Master Protein	0	FALSE	325.07	65	33	200	24	552	61.5	5.07	737.73	33
148702920	0.015873	0.283682	0.465318	-1.10371	Cyp7b1	cytochrome P450, family 7, subfamily b, polypeptide 1 [Mus musculus]	Master Protein Candidate	0	FALSE	13.463	8	3	6	3	507	58.5	9.09	16.27	3
148703115	0.015873	0.283682	1.13312	0.180301	Acad9	acyl-Coenzyme A dehydrogenase family, member 9, isoform CRA_b [Mus musculus]	None	0	FALSE	11.23	4	2	3	2	553	60.7	8.76	9.48	2
148704099	0.00793651	0.283682	1.0901	0.124461	Msra	methionine sulfoxide reductase A, isoform CRA_a, partial [Mus musculus]	None	0	FALSE	33.125	33	6	12	6	234	26.1	7.27	35.53	6
148704100	0.00793651	0.283682	1.09848	0.135515	Msra	methionine sulfoxide reductase A, isoform CRA_b, partial [Mus musculus]	None	0	FALSE	35.903	43	7	13	7	205	23.2	7.46	38.37	7
148704123	0.031746	0.353216	1.01434	0.0205474	Ctsb	cathepsin B, isoform CRA_a [Mus musculus]	Master Protein	0	FALSE	46.705	27	7	16	7	339	37.3	5.91	56.2	7
148704836	0.031746	0.353216	0.913615	-0.130342	Scfd1	sec1 family domain containing 1, partial [Mus musculus]	None	0	FALSE	5.981	8	3	4	3	479	53.8	8.91	4.33	3
148706090	0.00793651	0.283682	0.78021	-0.358065	2810007J24Rik; Sult2a8	RIKEN cDNA 2810007J24, isoform CRA_b [Mus musculus]	None	0	FALSE	24.99	83	5	14	5	60	7.1	5.83	39.36	5
148706092	0.00793651	0.283682	0.766397	-0.383836	2810007J24Rik; Sult2a8	RIKEN cDNA 2810007J24, isoform CRA_a [Mus musculus]	Master Protein	0	FALSE	84.479	55	14	37	14	282	33.3	7.02	115.09	14
148706138	0.031746	0.353216	1.09473	0.130571	Slc27a5	solute carrier family 27 (fatty acid transporter), member 5, isoform CRA_a [Mus musculus]	None	0	FALSE	49.816	19	9	15	9	689	76.2	8.46	44.17	9
148706294	0.00793651	0.283682	0.838222	-0.254595	C3	complement component 3, isoform CRA_a, partial [Mus musculus]	None	0	FALSE	11.152	13	3	6	3	215	24.1	8.4	14.58	3
148706296	0.015873	0.283682	0.894539	-0.160784	C3	complement component 3, isoform CRA_c, partial [Mus musculus]	Master Protein	0	FALSE	79.117	14	19	32	19	1681	188.3	6.73	76.26	19
148706614	0.0238095	0.353216	0.911907	-0.133041		mCG124077, isoform CRA_c [Mus musculus]	None	0	FALSE	44.157	45	6	23	6	157	17.8	6.68	83.94	6
148706615	0.031746	0.353216	0.934741	-0.0973616		mCG124077, isoform CRA_d [Mus musculus]	None	0	FALSE	78.506	56	13	47	13	237	27.6	6.74	152.57	13
148706801	0.015873	0.283682	0.706503	-0.501233		mCG125538 [Mus musculus]	None	0	FALSE	167.817	78	16	67	3	290	32.3	6.58	268.17	16
148707010	0.015873	0.283682	1.11052	0.151229	Hmgcs2	3-hydroxy-3-methylglutaryl-Coenzyme A synthase 2, isoform CRA_b, partial [Mus musculus]	Master Protein	0	FALSE	222.995	53	24	129	24	524	58.6	8.12	466.84	24
148707019	0.0396825	0.428629	0.570119	-0.810665		mCG119535, isoform CRA_a [Mus musculus]	None	0	FALSE	20.573	10	3	6	2	373	41.9	6.37	15.98	3
148707473	0.015873	0.283682	1.07178	0.100008		mCG20133, isoform CRA_a, partial [Mus musculus]	None	0	FALSE	70.045	38	8	30	8	269	30.3	7.21	124.27	8
148707474	0.015873	0.283682	1.07178	0.100008		mCG20133, isoform CRA_b [Mus musculus]	None	0	FALSE	70.045	40	8	30	8	253	28.3	6.61	124.27	8
148708002	0.015873	0.283682	0.928924	-0.106368	Hdlbp	high density lipoprotein (HDL) binding protein, isoform CRA_a [Mus musculus]	None	0	FALSE	105.954	25	23	32	23	1285	143.4	6.8	102.89	23
148708003	0.015873	0.283682	0.933598	-0.0991272	Hdlbp	high density lipoprotein (HDL) binding protein, isoform CRA_b [Mus musculus]	None	0	FALSE	95.995	28	20	29	20	1020	114.1	6.8	90.96	20
148708006	0.015873	0.283682	0.92998	-0.104728	Hdlbp	high density lipoprotein (HDL) binding protein, isoform CRA_d [Mus musculus]	Master Protein Candidate	0	FALSE	112.953	27	24	34	24	1268	141.7	6.87	108.54	24
148708008	0.015873	0.283682	0.924783	-0.112813	Hdlbp	high density lipoprotein (HDL) binding protein, isoform CRA_f [Mus musculus]	None	0	FALSE	71.373	23	15	23	15	827	92.3	8.87	75.97	15
148708009	0.015873	0.283682	0.925604	-0.111533	Hdlbp	high density lipoprotein (HDL) binding protein, isoform CRA_g [Mus musculus]	None	0	FALSE	74.541	26	16	24	16	825	92.2	8.75	78.48	16
148708011	0.015873	0.283682	0.92998	-0.104728	Hdlbp	high density lipoprotein (HDL) binding protein, isoform CRA_h [Mus musculus]	Master Protein	0	FALSE	112.953	26	24	34	24	1316	146.8	7.06	108.54	24
148708178	0.015873	0.283682	0.874317	-0.193772	Ugt1a6b	mCG14318, isoform CRA_e [Mus musculus]	Master Protein	0	FALSE	53.104	22	9	27	4	531	60.4	8.69	85.55	9
148708263	0.015873	0.283682	1.08884	0.122793	Ptma	prothymosin alpha, isoform CRA_b [Mus musculus]	Master Protein Candidate	0	FALSE	24.966	24	3	9	3	99	10.9	3.89	29.47	3
148708930	0.047619	0.450719	0.922078	-0.117039	Nqo2	NAD(P)H dehydrogenase, quinone 2, isoform CRA_b [Mus musculus]	None	0	FALSE	26.893	32	4	7	4	187	21.5	6.2	23.07	4
148709874	0.015873	0.283682	1.20021	0.263281		mCG10001 [Mus musculus]	Master Protein	0	FALSE	29.824	14	7	12	7	840	96.1	7.15	33.05	7
148709875	0.015873	0.283682	1.20021	0.263281		mCG130234 [Mus musculus]	None	0	FALSE	27.918	17	6	10	6	400	45.6	7.66	28.55	6
148709876	0.015873	0.283682	1.20021	0.263281		mCG130239 [Mus musculus]	None	0	FALSE	27.918	14	6	10	6	481	55.1	8.19	28.55	6
149241032	0.015873	0.283682	0.931545	-0.102303		Chain B, ISOCITRATE DEHYDROGENASE [NADP] CYTOPLASMIC	None	0	FALSE	216.208	73	27	100	27	410	46.1	6.74	352.12	27
154550673	0.00793651	0.283682	0.934888	-0.0971342	Nme2	expressed in non-metastatic cells 2 protein, partial [Mus musculus]	Master Protein Candidate	0	FALSE	82.971	76	9	40	6	144	16.3	8.02	159.33	9
157074229	0.015873	0.283682	1.20021	0.263281	Cyp2c69	cytochrome P450, family 2, subfamily c, polypeptide 69 precursor [Mus musculus]	None	0	FALSE	27.918	14	6	10	6	491	56.1	7.93	28.55	6
157829776	0.031746	0.353216	1.23785	0.307835		Chain A, C1gV32DF57H MUTANT OF MURINE ADIPOCYTE LIPID BINDING Protein At Ph 4.5	Master Protein Candidate	0	FALSE	8.098	15	2	4	2	131	14.5	8.09	11.68	2
157829797	0.031746	0.353216	1.23785	0.307835		Chain A, V32dF57H MUTANT OF MURINE ADIPOCYTE LIPID BINDING PROTEIN	Master Protein Candidate	0	FALSE	8.098	15	2	4	2	131	14.5	8.32	11.68	2
159163379	0.031746	0.353216	1.12108	0.164884		Chain A, 60S ribosomal protein L12	None	0	FALSE	8.94	17	2	8	2	92	9.3	9.48	21.84	2
160285839	0.031746	0.353216	1.23785	0.307835		Chain A, Fatty Acid-binding Protein	Master Protein	0	FALSE	8.098	12	2	4	2	155	17	9.16	11.68	2
161484660	0.00793651	0.283682	1.13376	0.181113	Cpox	oxygen-dependent coproporphyrinogen-III oxidase, mitochondrial precursor [Mus musculus]	Master Protein	0	FALSE	29.33	15	6	12	6	443	49.7	8.53	23.72	6
163644329	0.015873	0.283682	1.20434	0.26824	Apoe	apolipoprotein E precursor [Mus musculus]	Master Protein	0	FALSE	65.192	43	13	28	13	311	35.8	5.68	84.56	13
167555029	0.031746	0.353216	0.904947	-0.144095	Fga	fibrinogen alpha chain isoform 1 preproprotein [Mus musculus]	Master Protein Candidate	0	FALSE	90.717	27	15	33	15	789	87.4	6.11	103.05	15
169313596	0.00793651	0.283682	0.747292	-0.420255	2810007J24Rik; Sult2a8	sulfotransferase-like protein 2 [Mus musculus]	None	0	FALSE	53.887	59	8	20	8	157	18.6	8.09	65.07	8
170295838	0.00793651	0.283682	1.25584	0.328651	Cyp3a41b; Cyp3a41a	cytochrome P450 3A41 [Mus musculus]	None	0	FALSE	21.75	11	4	8	4	504	57.9	7.68	27.32	4
185177518	0.015873	0.283682	0.944867	-0.0818169		Chain A, Acidic leucine-rich nuclear phosphoprotein 32 family member A	Master Protein Candidate	0	FALSE	38.281	54	8	15	8	169	19.2	4.93	43.29	8
186287327	0.00793651	0.283682	1.20365	0.267413	Cyp2c68	cytochrome P450, family 2, subfamily c, polypeptide 68 precursor [Mus musculus]	None	0	FALSE	26.308	13	6	11	6	491	56	7.36	31.04	6
187951853	0.00793651	0.283682	1.25584	0.328651	Cyp3a41b; Cyp3a41a	Cytochrome P450, family 3, subfamily a, polypeptide 41B [Mus musculus]	None	0	FALSE	21.75	11	4	8	4	504	57.9	7.42	27.32	4
187952237	0.015873	0.283682	1.20021	0.263281	Cyp2c40	Cytochrome P450, family 2, subfamily c, polypeptide 40 [Mus musculus]	Master Protein Candidate	0	FALSE	29.824	15	7	12	7	491	55.7	7.52	33.05	7
187956944	0.015873	0.283682	0.968803	-0.0457252	Isoc2a	Isoc2a protein [Mus musculus]	None	0	FALSE	41.829	50	6	22	6	206	22.4	8.02	80.98	6
205371731	0.015873	0.283682	0.909003	-0.137643	Serpina1c	RecName: Full=Alpha-1-antitrypsin 1-3; AltName: Full=Alpha-1 protease inhibitor 3; AltName: Full=Alpha-1 protease inhibitor 6; AltName: Full=Alpha-1-antitrypsin 1-6; AltName: Full=Serine protease inhibitor 1-3; AltName: Full=Serine protease inhibitor 1-6; AltName: Full=Serine protease inhibitor A1c; Short=Serpin A1c; Flags: Precursor	None	0	FALSE	51.414	35	10	24	3	412	45.8	5.44	81.8	10
211827288	0.00793651	0.283682	0.94486	-0.0818278	Aars	Aars protein, partial [Mus musculus]	None	0	FALSE	34.877	17	6	13	6	458	49.6	7.06	37.82	6
228008365	0.031746	0.353216	1.09162	0.126468	Slc27a5	bile acyl-CoA synthetase precursor [Mus musculus]	Master Protein	0	FALSE	52.313	22	10	16	10	689	76.2	8.38	47.21	10
240120132	0.031746	0.353216	0.460265	-1.11946	Hsd3b3	3 beta-hydroxysteroid dehydrogenase/Delta 5--_4-isomerase type 3 isoform 2 [Mus musculus]	None	0	FALSE	7.774	14	3	4	3	318	36.1	8.03	5.82	3
254587896	0.015873	0.283682	0.919617	-0.120895	Ugt2a3	UDP-glucuronosyltransferase 2A3 precursor [Mus musculus]	Master Protein Candidate	0	FALSE	43.542	21	8	21	8	534	61.1	7.93	52.96	8
254939516	0.015873	0.283682	0.946667	-0.0790716	Cyp2d22	cytochrome P450, family 2, subfamily d, polypeptide 22 [Mus musculus]	Master Protein Candidate	0	FALSE	52.106	19	8	21	5	500	56.4	6.98	67.35	8
257305769	0.047619	0.450719	0.884721	-0.176706		unnamed protein product [Mus musculus]	None	0	FALSE	98.02	21	21	37	20	1336	147.2	6.71	104.37	21
259090256	0.031746	0.353216	1.23785	0.307835		Chain A, Identification And Characterization Of A Small Molecule Inhibitor Of Fatty Acid Binding Proteins	Master Protein Candidate	0	FALSE	8.098	15	2	4	2	131	14.5	8.4	11.68	2
284413688	0.015873	0.283682	0.874317	-0.193772	Ugt1a6b	UDP glucuronosyltransferase 1 family, polypeptide A6B precursor [Mus musculus]	None	0	FALSE	49.293	20	8	26	3	531	60.5	8.69	83.5	8
291061432	0.00793651	0.283682	0.430014	-1.21754	Gstp2	glutathione S-transferase pi 2, partial [Mus musculus]	None	0	FALSE	104.329	42	5	63	5	188	21.1	6.92	275.84	5
298533200	0.031746	0.353216	1.07717	0.107242		unnamed protein product [Mus musculus]	Master Protein Candidate	0	FALSE	106.004	49	21	47	21	452	50.9	8.69	144.27	21
298533226	0.031746	0.353216	1.07143	0.0995357		unnamed protein product [Mus musculus]	None	0	FALSE	85.508	32	17	39	17	523	58.7	8.65	117.76	17
334359524	0.031746	0.353216	0.935673	-0.0959244		Chain A, Calreticulin	None	0	FALSE	206.774	67	18	103	18	332	38.1	5.1	351.37	18
340707738	0.015873	0.283682	0.466042	-1.10147		Chain B, Glutathione S-transferase P 1	None	0	FALSE	117.589	47	8	70	8	209	23.4	7.96	280.57	8
341940389	0.00793651	0.283682	1.35267	0.435808	Cyp3a16	RecName: Full=Cytochrome P450 3A16; AltName: Full=CYPIIIA16	None	0	FALSE	14.67	10	5	10	5	504	57.8	7.39	29.63	5
341940394	0.015873	0.283682	0.465318	-1.10371	Cyp7b1	RecName: Full=25-hydroxycholesterol 7-alpha-hydroxylase; AltName: Full=Cytochrome P450 7B1; AltName: Full=Hippocampal transcript 1 protein; Short=HCT-1; AltName: Full=Oxysterol 7-alpha-hydroxylase	Master Protein Candidate	0	FALSE	13.463	8	3	6	3	507	58.4	9.09	16.27	3
341940525	0.015873	0.283682	0.894539	-0.160784	C3	RecName: Full=Complement C3; AltName: Full=HSE-MSF; Contains: RecName: Full=Complement C3 beta chain; Contains: RecName: Full=C3-beta-c; Short=C3bc; Contains: RecName: Full=Complement C3 alpha chain; Contains: RecName: Full=C3a anaphylatoxin; Contains: RecName: Full=Acylation stimulating protein; Short=ASP; AltName: Full=C3adesArg; Contains: RecName: Full=Complement C3b alpha' chain; Contains: Re…	Master Protein Candidate	0	FALSE	79.117	14	19	32	19	1663	186.4	6.73	76.26	19
341940812	0.031746	0.353216	1.08384	0.116158	Uroc1	RecName: Full=Urocanate hydratase; Short=Urocanase; AltName: Full=Imidazolonepropionate hydrolase	Master Protein Candidate	0	FALSE	109.734	37	18	41	18	676	74.5	7.53	123.11	18
358439528	0.031746	0.353216	0.962887	-0.0545622	Immt	MICOS complex subunit Mic60 isoform 3 [Mus musculus]	None	0	FALSE	75.518	24	18	31	18	741	82.4	6.7	89.79	18
358439552	0.0238095	0.353216	0.945752	-0.0804657	Immt	MICOS complex subunit Mic60 isoform 6 [Mus musculus]	None	0	FALSE	50.486	26	13	21	13	470	52	8.34	57.04	13
358679363	0.00793651	0.283682	1.09848	0.135515	Msra	mitochondrial peptide methionine sulfoxide reductase isoform 2 [Mus musculus]	None	0	FALSE	35.903	42	7	13	7	210	23.5	8.41	38.37	7
358679365	0.00793651	0.283682	1.0901	0.124461	Msra	mitochondrial peptide methionine sulfoxide reductase isoform 3 [Mus musculus]	None	0	FALSE	33.125	40	6	12	6	193	21.5	7.58	35.53	6
358679367	0.00793651	0.283682	1.09848	0.135515	Msra	mitochondrial peptide methionine sulfoxide reductase isoform 4 [Mus musculus]	None	0	FALSE	35.903	47	7	13	7	191	21.6	8.16	38.37	7
371927257	0.00793651	0.283682	1.07775	0.108028		Chain A, Peptide methionine sulfoxide reductase	Master Protein Candidate	0	FALSE	38.67	46	8	15	8	212	23.6	7.2	43.32	8
378792359	0.015873	0.283682	0.872521	-0.196738	Psma2	Chain A, Proteasome Subunit Alpha Type-2	Master Protein Candidate	0	FALSE	23.519	28	4	9	4	234	25.9	8.32	22.03	4
411024310	0.031746	0.353216	0.872587	-0.196629		Chain A, Alcohol dehydrogenase [NADP(+)]	Master Protein Candidate	0	FALSE	113.038	67	19	53	19	324	36.4	7.39	170.74	19
459683864	0.031746	0.353216	1.06728	0.0939364	Hnrnpr	heterogeneous nuclear ribonucleoprotein R isoform a [Mus musculus]	None	0	FALSE	11.361	5	3	6	3	632	70.8	8.13	14.56	3
459683866	0.031746	0.353216	1.06392	0.0893863	Hnrnpr	heterogeneous nuclear ribonucleoprotein R isoform b [Mus musculus]	None	0	FALSE	7.381	4	2	4	2	531	59.6	9.16	9.42	2
485602210	0.00793651	0.283682	1.0999	0.137367		Chain B, Catenin alpha-1	Master Protein	0	FALSE	25.185	12	6	9	6	912	100.6	6.29	21.95	6
568905511	0.015873	0.283682	0.867701	-0.204731	Adhfe1	PREDICTED: hydroxyacid-oxoacid transhydrogenase, mitochondrial isoform X1 [Mus musculus]	Master Protein Candidate	0	FALSE	8.85	6	2	4	2	433	46.5	7.31	11.4	2
568905604	0.047619	0.450719	0.915174	-0.127881	Cyp27a1	PREDICTED: sterol 26-hydroxylase, mitochondrial isoform X1 [Mus musculus]	None	0	FALSE	69.423	38	10	21	10	391	44.7	8.54	76.3	10
568920555	0.031746	0.353216	1.23785	0.307835	Fabp4	PREDICTED: fatty acid-binding protein, adipocyte isoform X1 [Mus musculus]	Master Protein Candidate	0	FALSE	8.098	13	2	4	2	149	16.3	8.43	11.68	2
568920744	0.015873	0.283682	0.465318	-1.10371	Cyp7b1	PREDICTED: 25-hydroxycholesterol 7-alpha-hydroxylase isoform X2 [Mus musculus]	None	0	FALSE	4.562	7	2	3	2	352	40.4	8.79	2.09	2
568921840	0.015873	0.283682	0.901559	-0.149505	Gstm6	PREDICTED: glutathione S-transferase Mu 6 isoform X1 [Mus musculus]	Master Protein Candidate	0	FALSE	46.547	48	10	33	6	253	29.8	5.74	93.52	10
568921842	0.015873	0.283682	0.901559	-0.149505	Gstm6	PREDICTED: glutathione S-transferase Mu 6 isoform X2 [Mus musculus]	Master Protein Candidate	0	FALSE	46.547	46	10	33	6	227	26.6	5.54	93.52	10
568921844	0.015873	0.283682	0.901559	-0.149505	Gstm6	PREDICTED: glutathione S-transferase Mu 6 isoform X3 [Mus musculus]	Master Protein Candidate	0	FALSE	46.547	49	10	33	6	216	25.4	6.93	93.52	10
568921846	0.031746	0.353216	0.916992	-0.125019	Gstm6	PREDICTED: glutathione S-transferase Mu 6 isoform X4 [Mus musculus]	None	0	FALSE	24.031	44	7	25	5	192	22.7	5.5	68.5	7
568931992	0.031746	0.353216	1.06728	0.0939364	Hnrnpr	PREDICTED: heterogeneous nuclear ribonucleoprotein R isoform X1 [Mus musculus]	None	0	FALSE	11.361	5	3	6	3	635	71.1	8.13	14.56	3
568932002	0.031746	0.353216	1.06392	0.0893863	Hnrnpr	PREDICTED: heterogeneous nuclear ribonucleoprotein R isoform X3 [Mus musculus]	None	0	FALSE	7.381	4	2	4	2	534	59.9	9.16	9.42	2
568932855	0.015873	0.283682	1.14935	0.200819	Crot	PREDICTED: peroxisomal carnitine O-octanoyltransferase isoform X1 [Mus musculus]	None	0	FALSE	20.65	9	4	8	4	540	60.9	7.44	20.27	4
568938945	0.00793651	0.283682	1.35267	0.435808	Cyp3a16	PREDICTED: cytochrome P450 3A16 isoform X1 [Mus musculus]	None	0	FALSE	13.135	9	4	9	4	482	55.5	7.15	27.68	4
568939036	0.00793651	0.283682	1.25584	0.328651	Cyp3a41a; Cyp3a41b	PREDICTED: cytochrome P450 3A41 isoform X1 [Mus musculus]	None	0	FALSE	21.75	13	4	8	4	426	48.9	6.67	27.32	4
568939471	0.00793651	0.283682	1.09519	0.13118	Pon1	PREDICTED: serum paraoxonase/arylesterase 1 isoform X2 [Mus musculus]	Master Protein Candidate	0	FALSE	32.916	23	6	12	6	288	32.1	5.91	38.97	6
568941803	0.015873	0.283682	1.08442	0.116926	Uroc1	PREDICTED: urocanate hydratase isoform X2 [Mus musculus]	None	0	FALSE	86.016	36	14	30	14	569	62.3	7.09	93.43	14
568949358	0.015873	0.283682	0.931262	-0.102741	Acsm1	PREDICTED: acyl-coenzyme A synthetase ACSM1, mitochondrial isoform X1 [Mus musculus]	None	0	FALSE	111.553	35	15	41	15	601	67	8.44	135.25	15
568958751	0.00793651	0.283682	0.92878	-0.10659	Hyou1	PREDICTED: hypoxia up-regulated protein 1 isoform X2 [Mus musculus]	None	0	FALSE	250.441	47	32	93	32	998	111	5.17	321.56	32
568960675	0.015873	0.283682	0.944867	-0.0818169	Anp32a	PREDICTED: acidic leucine-rich nuclear phosphoprotein 32 family member A isoform X1 [Mus musculus]	Master Protein	0	FALSE	38.281	37	8	15	8	250	28.8	4.13	43.29	8
568960677	0.015873	0.283682	0.944867	-0.0818169	Anp32a	PREDICTED: acidic leucine-rich nuclear phosphoprotein 32 family member A isoform X2 [Mus musculus]	Master Protein Candidate	0	FALSE	38.281	39	8	15	8	233	26.8	4.06	43.29	8
568961743	0.031746	0.353216	1.06728	0.0939364	Syncrip	PREDICTED: heterogeneous nuclear ribonucleoprotein Q isoform X1 [Mus musculus]	Master Protein Candidate	0	FALSE	21.67	9	5	8	5	605	67.4	9.06	20.33	5
568961745	0.031746	0.353216	1.06392	0.0893863	Syncrip	PREDICTED: heterogeneous nuclear ribonucleoprotein Q isoform X2 [Mus musculus]	None	0	FALSE	12.529	6	3	5	3	525	59	9.36	12.83	3
568966666	0.015873	0.283682	0.912724	-0.131749	Ftcd	PREDICTED: formimidoyltransferase-cyclodeaminase isoform X2 [Mus musculus]	None	0	FALSE	96.071	55	16	37	16	392	42.9	6.95	123.15	16
568966678	0.031746	0.353216	1.12929	0.17542	Gamt	PREDICTED: guanidinoacetate N-methyltransferase isoform X2 [Mus musculus]	None	0	FALSE	23.884	28	3	6	3	216	23.9	6.02	29.5	3
568971248	0.031746	0.353216	1.08148	0.113009	Aldh3a2	PREDICTED: fatty aldehyde dehydrogenase isoform X2 [Mus musculus]	Master Protein Candidate	0	FALSE	42.683	28	11	16	11	487	54.3	8.48	46.65	11
568971250	0.031746	0.353216	1.08148	0.113009	Aldh3a2	PREDICTED: fatty aldehyde dehydrogenase isoform X3 [Mus musculus]	Master Protein Candidate	0	FALSE	42.683	28	11	16	11	482	53.7	8.48	46.65	11
568998601	0.00793651	0.283682	0.931665	-0.102117	Haao	PREDICTED: 3-hydroxyanthranilate 3,4-dioxygenase isoform X2 [Mus musculus]	None	0	FALSE	95.306	66	13	39	13	252	28.6	5.82	142.49	13
568998603	0.00793651	0.283682	0.931665	-0.102117	Haao	PREDICTED: 3-hydroxyanthranilate 3,4-dioxygenase isoform X3 [Mus musculus]	None	0	FALSE	95.306	74	13	39	13	225	25.5	6.8	142.49	13
568998606	0.015873	0.283682	0.925189	-0.112179	Haao	PREDICTED: 3-hydroxyanthranilate 3,4-dioxygenase isoform X4 [Mus musculus]	None	0	FALSE	62.724	57	9	37	9	168	19.9	7.17	130.65	9
569003067	0.00793651	0.283682	1.0999	0.137367	Ctnna1	PREDICTED: catenin alpha-1 isoform X2 [Mus musculus]	Master Protein Candidate	0	FALSE	25.185	21	6	9	6	536	59.5	5.6	21.95	6
569007471	0.00793651	0.283682	1.21826	0.28482	Cyp2c68	PREDICTED: cytochrome P450, family 2, subfamily c, polypeptide 68 isoform X1 [Mus musculus]	None	0	FALSE	21.927	12	5	9	5	437	50	7.2	26.69	5
755496301	0.015873	0.283682	0.94902	-0.0754902	Eprs	PREDICTED: bifunctional glutamate/proline--tRNA ligase isoform X4 [Mus musculus]	None	0	FALSE	39.648	15	11	16	11	980	109.4	7.59	36.61	11
755503338	0.031746	0.353216	1.07556	0.105094	Fmo5	PREDICTED: dimethylaniline monooxygenase [N-oxide-forming] 5 isoform X3 [Mus musculus]	None	0	FALSE	70.468	43	17	35	17	404	45.4	8.44	95.43	17
755503388	0.0396825	0.428629	0.570119	-0.810665	Hsd3b2	PREDICTED: 3 beta-hydroxysteroid dehydrogenase/Delta 5--_4-isomerase type 2 isoform X2 [Mus musculus]	None	0	FALSE	20.573	11	3	6	2	332	37.3	6.73	15.98	3
755515320	0.015873	0.283682	1.17052	0.227146	Pon1	PREDICTED: serum paraoxonase/arylesterase 1 isoform X1 [Mus musculus]	None	0	FALSE	11.198	10	3	4	3	325	36.2	5.01	12.09	3
755519448	0.00793651	0.283682	1.0752	0.104609	Cyp2a22	PREDICTED: cytochrome P450, family 2, subfamily a, polypeptide 22 isoform X2 [Mus musculus]	None	0	FALSE	35.937	26	8	21	7	272	31.8	9.64	52.71	8
755547652	0.00793651	0.283682	1.09848	0.135515	Msra	PREDICTED: mitochondrial peptide methionine sulfoxide reductase isoform X1 [Mus musculus]	None	0	FALSE	35.903	45	7	13	7	196	22.1	7.52	38.37	7
755551687	0.00793651	0.283682	0.769024	-0.378899	Csad	PREDICTED: cysteine sulfinic acid decarboxylase isoform X1 [Mus musculus]	None	0	FALSE	87.793	43	13	31	13	463	51.6	6.48	103.7	13
755551701	0.00793651	0.283682	0.769024	-0.378899	Csad	PREDICTED: cysteine sulfinic acid decarboxylase isoform X4 [Mus musculus]	None	0	FALSE	84.524	45	12	29	12	428	47.3	7.74	99.02	12
755563447	0.015873	0.283682	1.20021	0.263281	Cyp2c67	PREDICTED: cytochrome P450, family 2, subfamily c, polypeptide 67 isoform X1 [Mus musculus]	Master Protein Candidate	0	FALSE	29.824	15	7	12	7	481	55	7.52	33.05	7
807201067	0.031746	0.353216	0.913615	-0.130342	Scfd1	sec1 family domain-containing protein 1 isoform 2 [Mus musculus]	None	0	FALSE	5.981	10	3	4	3	390	44	5.87	4.33	3
848130714	0.031746	0.353216	1.23785	0.307835	Fabp4	Chain B, Fatty Acid-binding Protein, Adipocyte	Master Protein Candidate	0	FALSE	8.098	14	2	4	2	132	14.6	8.4	11.68	2
873090820	0.047619	0.450719	1.03742	0.0530029	Copb2	Chain D, Coatomer Subunit Beta'	Master Protein	0	FALSE	35.397	10	8	12	8	905	102.4	5.3	29.93	8
902763357	0.031746	0.353216	1.06392	0.0893863	Syncrip	heterogeneous nuclear ribonucleoprotein Q isoform 4 [Mus musculus]	None	0	FALSE	12.529	7	3	5	3	464	52	9.16	12.83	3
902967410	0.015873	0.283682	0.955238	-0.0660677	Pccb	propionyl-CoA carboxylase beta chain, mitochondrial isoform 2 precursor [Mus musculus]	None	0	FALSE	60.827	35	12	22	12	504	54.6	7.49	61.45	12
939977622	0.031746	0.353216	0.956436	-0.0642602	Mdh1	malate dehydrogenase, peroxisomal isoform Mdh1x [Mus musculus]	None	0	FALSE	121.42	38	14	58	14	355	39	6.93	195.24	14
973744285	0.031746	0.353216	1.23785	0.307835		Chain A, Fatty Acid-binding Protein, Adipocyte	Master Protein Candidate	0	FALSE	8.098	14	2	4	2	134	14.8	8.4	11.68	2
1039730031	0.031746	0.353216	0.867159	-0.205632	Aox3	PREDICTED: aldehyde oxidase 3 isoform X3 [Mus musculus]	None	0	FALSE	93.714	22	18	32	17	1111	122.1	6.14	96.07	18
1039748914	0.00793651	0.283682	0.769024	-0.378899	Csad	PREDICTED: cysteine sulfinic acid decarboxylase isoform X2 [Mus musculus]	None	0	FALSE	87.793	40	13	31	13	500	55	7.9	103.7	13
1039763827	0.0396825	0.428629	0.570119	-0.810665	Hsd3b3	PREDICTED: 3 beta-hydroxysteroid dehydrogenase/Delta 5--_4-isomerase type 3 isoform X3 [Mus musculus]	None	0	FALSE	24.432	18	5	8	4	387	43.8	8.79	18	5
1039770046	0.00793651	0.283682	1.25584	0.328651	Cyp3a41b	PREDICTED: cytochrome P450 3A41 isoform X1 [Mus musculus]	None	0	FALSE	21.75	12	4	8	4	455	52.3	6.47	27.32	4
1039776036	0.031746	0.353216	0.962887	-0.0545622	Immt	PREDICTED: MICOS complex subunit Mic60 isoform X1 [Mus musculus]	None	0	FALSE	75.518	24	18	31	18	752	83.4	6.7	89.79	18
1039777790	0.00793651	0.283682	1.32031	0.400879	Sult1a1	PREDICTED: sulfotransferase 1A1 isoform X2 [Mus musculus]	None	0	FALSE	58.819	59	10	26	10	227	26.7	8.24	80.42	10
1062593943	0.031746	0.353216	1.08034	0.111483		fatty aldehyde dehydrogenase isoform 3 [Mus musculus]	None	0	FALSE	38.75	28	10	14	10	437	48.4	8.88	43.89	10
1062594028	0.031746	0.353216	1.08148	0.113009		fatty aldehyde dehydrogenase isoform 1 [Mus musculus]	Master Protein	0	FALSE	42.683	27	11	16	11	507	56.6	9.09	46.65	11
1109663858	0.00793651	0.283682	1.09848	0.135515		mitochondrial peptide methionine sulfoxide reductase isoform 5 [Mus musculus]	None	0	FALSE	35.903	53	7	13	7	169	19.2	7.84	38.37	7
1148885687	0.015873	0.283682	1.13778	0.186225		hypothetical protein [Mus musculus]	Master Protein	0	FALSE	11.113	18	3	4	3	171	20	9.2	9.92	3
1243912607	0.031746	0.353216	1.07717	0.107242		Chain A, Isocitrate Dehydrogenase [nadp], Mitochondrial	Master Protein Candidate	0	FALSE	106.004	52	21	47	21	422	47.8	7.99	144.27	21
1243912610	0.031746	0.353216	1.07717	0.107242		Chain B, Isocitrate Dehydrogenase [nadp], Mitochondrial	Master Protein Candidate	0	FALSE	106.004	52	21	47	21	422	47.8	8.15	144.27	21
1246764216	0.015873	0.283682	1.09848	0.135515		ATP-binding cassette sub-family D member 3 isoform 2 [Mus musculus]	None	0	FALSE	66.89	26	12	27	12	586	67.3	8.65	79.11	12
1270111384	0.015873	0.283682	0.867701	-0.204731		hydroxyacid-oxoacid transhydrogenase, mitochondrial isoform 3 [Mus musculus]	Master Protein Candidate	0	FALSE	8.85	6	2	4	2	397	42.7	7.12	11.4	2
1270111440	0.015873	0.283682	0.867701	-0.204731		hydroxyacid-oxoacid transhydrogenase, mitochondrial isoform 2 [Mus musculus]	Master Protein Candidate	0	FALSE	8.85	6	2	4	2	419	45	7.12	11.4	2
1273022158	0.031746	0.353216	0.966303	-0.0494521		bifunctional glutamate/proline--tRNA ligase isoform 2 [Mus musculus]	Master Protein	0	FALSE	53.542	13	15	21	15	1519	170.8	7.84	47.61	15
1284806251	0.031746	0.353216	0.881356	-0.182203		peroxiredoxin-5, mitochondrial isoform 2 precursor [Mus musculus]	None	0	FALSE	51.313	43	7	24	7	171	17.9	9.03	86.27	7
1285033727	0.031746	0.353216	1.12654	0.171903		Chain B, Kynurenine--oxoglutarate transaminase 3	None	0	FALSE	56.722	34	11	27	11	410	46.1	6.47	87.08	11
1285033728	0.015873	0.283682	1.11352	0.155126		Chain A, Kynurenine--oxoglutarate transaminase 3	Master Protein Candidate	0	FALSE	63.832	38	13	30	12	411	46.2	6.62	95.88	13
1285033731	0.015873	0.283682	1.11352	0.155126		Chain B, Kynurenine--oxoglutarate transaminase 3	Master Protein Candidate	0	FALSE	63.832	38	13	30	12	410	46.1	6.62	95.88	13
1315690770	0.00793651	0.283682	0.769024	-0.378899		cysteine sulfinic acid decarboxylase isoform 2 [Mus musculus]	None	0	FALSE	87.793	50	13	31	13	398	44.2	6.84	103.7	13
1327850606	0.0396825	0.428629	0.570119	-0.810665		3 beta-hydroxysteroid dehydrogenase/Delta 5--_4-isomerase type 2 [Mus musculus]	None	0	FALSE	20.573	10	3	6	2	373	41.9	6.37	15.98	3
1335348669	0.00793651	0.283682	1.31027	0.389862		sulfotransferase 1A1 [Mus musculus]	Master Protein Candidate	0	FALSE	97.934	66	13	37	13	298	34.6	8.1	115.77	13
1337931627	0.015873	0.283682	0.949102	-0.0753653		nucleobindin-2 precursor [Mus musculus]	Master Protein	0	FALSE	40.384	22	8	16	8	420	50.3	5.15	45.69	8
1341395581	0.015873	0.283682	1.17583	0.233686		mitochondrial glutamate carrier 1 isoform b [Mus musculus]	None	0	FALSE	15.312	24	4	5	4	243	26	8.84	13.2	4
1345621987	0.00793651	0.283682	1.24267	0.313442		Chain D, 14-3-3 protein eta	Master Protein	0	FALSE	40.447	42	11	22	6	252	28.8	4.86	59.24	11
1375023059	0.031746	0.353216	0.962887	-0.0545622		MICOS complex subunit Mic60 isoform 8 [Mus musculus]	None	0	FALSE	79.013	25	19	32	19	745	82.8	6.61	92.46	19
1397983672	0.031746	0.353216	1.06531	0.0912681		Chain S, NADH dehydrogenase [ubiquinone] 1 alpha subcomplex subunit 2	Master Protein	0	FALSE	14.801	30	3	5	3	99	10.9	9.99	15.55	3
1397983949	0.047619	0.450719	1.05995	0.0840027		Chain n, NADH dehydrogenase [ubiquinone] 1 beta subcomplex subunit 9	Master Protein	0	FALSE	6.992	16	2	3	2	179	22	7.8	9.3	2
1418639862	0.015873	0.283682	0.933023	-0.100015		Chain B, Isocitrate dehydrogenase [NADP] cytoplasmic	None	0	FALSE	219.955	75	29	106	29	414	46.6	7.17	367.7	29
1423310306	0.047619	0.450719	1.05995	0.0840027		NADH dehydrogenase [ubiquinone] 1 beta subcomplex subunit 9 isoform 2 [Mus musculus]	Master Protein Candidate	0	FALSE	6.992	21	2	3	2	136	16.7	5.62	9.3	2
1424027973	0.00793651	0.283682	0.967871	-0.0471126		glycine N-methyltransferase isoform 2 [Mus musculus]	None	0	FALSE	115.029	65	10	47	10	257	28.6	7.39	191.76	10
1540347155	0.015873	0.283682	1.09681	0.13331		Chain B, Catenin alpha-1	None	0	FALSE	16.192	24	4	7	4	263	28.8	8.91	17.4	4
1566185459	0.015873	0.283682	1.09293	0.1282		mitochondrial amidoxime reducing component 2 isoform 3 [Mus musculus]	None	0	FALSE	29.246	32	7	22	7	245	28	6.02	49.74	7
1566185461	0.00793651	0.283682	1.10842	0.148506		mitochondrial amidoxime reducing component 2 isoform 2 precursor [Mus musculus]	None	0	FALSE	33.076	31	8	19	8	280	31.5	8.76	52.27	8
1581447701	0.00793651	0.283682	0.9277	-0.10827		Chain A, Aldo-keto reductase family 1 member C13	None	0	FALSE	59.078	55	13	24	5	321	36.7	6.44	72.72	13

## Sheet: sorted per FC
Accession	Pvalue	FDR	FC	log2FC	Gene Symbol	Description	Master	Exp. q-value: Combined	Contaminant	Sum PEP Score	Coverage [%]	# Peptides	# PSMs	# Unique Peptides	# AAs	MW [kDa]	calc. pI	Score Sequest HT: Sequest HT	# Peptides (by Search Engine): Sequest HT
6730327	0.015873	0.283682	1.97025	0.978376		Chain A, Solution Structure Of The Alpha-Domain Of Mouse Metallothionein-1	Master Protein Candidate	0	FALSE	15.424	65	2	7	2	31	3	7.97	23.53	2
7305285	0.015873	0.283682	1.97025	0.978376	Mt1	metallothionein-1 [Mus musculus]	Master Protein	0	FALSE	15.424	33	2	7	2	61	6	7.96	23.53	2
21594175	0.015873	0.283682	1.75264	0.809528	Mt2	Metallothionein 2 [Mus musculus]	Master Protein	0	FALSE	12.022	33	2	7	2	61	6.1	7.83	13.39	2
666968	0.00793651	0.283682	1.35267	0.435808	Cyp3a16	cytochrome P450IIIA [Mus musculus]	None	0	FALSE	14.67	10	5	10	5	504	57.9	7.42	29.63	5
86577822	0.00793651	0.283682	1.35267	0.435808	Cyp3a16	Cytochrome P450, family 3, subfamily a, polypeptide 16 [Mus musculus]	None	0	FALSE	14.67	10	5	10	5	504	57.9	7.39	29.63	5
148687033	0.00793651	0.283682	1.35267	0.435808		mCG17264, partial [Mus musculus]	None	0	FALSE	14.67	10	5	10	5	522	59.9	7.93	29.63	5
341940389	0.00793651	0.283682	1.35267	0.435808	Cyp3a16	RecName: Full=Cytochrome P450 3A16; AltName: Full=CYPIIIA16	None	0	FALSE	14.67	10	5	10	5	504	57.8	7.39	29.63	5
568938945	0.00793651	0.283682	1.35267	0.435808	Cyp3a16	PREDICTED: cytochrome P450 3A16 isoform X1 [Mus musculus]	None	0	FALSE	13.135	9	4	9	4	482	55.5	7.15	27.68	4
1039777790	0.00793651	0.283682	1.32031	0.400879	Sult1a1	PREDICTED: sulfotransferase 1A1 isoform X2 [Mus musculus]	None	0	FALSE	58.819	59	10	26	10	227	26.7	8.24	80.42	10
14919404	0.00793651	0.283682	1.31488	0.39493	Sult1a1	Sulfotransferase family 1A, phenol-preferring, member 1 [Mus musculus]	None	0	FALSE	87.985	65	11	35	11	263	30.5	8.54	108.65	11
148685462	0.00793651	0.283682	1.31027	0.389862	Sult1a1	sulfotransferase family 1A, phenol-preferring, member 1, isoform CRA_b [Mus musculus]	Master Protein	0	FALSE	97.934	62	13	37	13	316	36.6	8.1	115.77	13
1335348669	0.00793651	0.283682	1.31027	0.389862		sulfotransferase 1A1 [Mus musculus]	Master Protein Candidate	0	FALSE	97.934	66	13	37	13	298	34.6	8.1	115.77	13
1711570	0.00793651	0.283682	1.31	0.389567	Sult1a1	RecName: Full=Sulfotransferase 1A1; Short=ST1A1; AltName: Full=Aryl sulfotransferase; AltName: Full=Phenol sulfotransferase; AltName: Full=Phenol/aryl sulfotransferase; Short=mSTp1; AltName: Full=ST1A4; AltName: Full=Sulfokinase	None	0	FALSE	82.567	53	11	32	11	291	34	8.1	98.4	11
5420463	0.00793651	0.283682	1.31	0.389567	Sult1a1	arylsulfotransferase ST1A4 [Mus musculus]	None	0	FALSE	82.567	52	11	32	11	298	34.7	8.1	98.4	11
12860603	0.00793651	0.283682	1.30805	0.387413	Hist1h1b	unnamed protein product, partial [Mus musculus]	None	0	FALSE	26.746	22	5	18	2	220	22.3	10.89	37.52	5
5932290	0.015873	0.283682	1.29564	0.373668	Igh-VJ558	immunoglobulin heavy chain constant region, partial [Mus musculus]	None	0	FALSE	13.114	25	3	3	3	243	26.2	5.01	11.53	3
14789819	0.015873	0.283682	1.29564	0.373668	Igh-VJ558	Igh protein, partial [Mus musculus]	None	0	FALSE	13.114	13	3	3	3	480	51.9	5.2	11.53	3
15029912	0.015873	0.283682	1.29564	0.373668	Igh-VJ558	Igh protein [Mus musculus]	None	0	FALSE	13.114	13	3	3	3	482	51.8	5.19	11.53	3
15488687	0.015873	0.283682	1.29564	0.373668	Igh-VJ558	Igh protein [Mus musculus]	None	0	FALSE	13.114	13	3	3	3	481	52.1	5.57	11.53	3
15488815	0.015873	0.283682	1.29564	0.373668	Igh-VJ558	Igh protein [Mus musculus]	None	0	FALSE	13.114	13	3	3	3	488	52.9	5.2	11.53	3
15489086	0.015873	0.283682	1.29564	0.373668	Igh-VJ558	Igh protein [Mus musculus]	None	0	FALSE	13.114	13	3	3	3	479	51.6	5.27	11.53	3
17390754	0.015873	0.283682	1.29564	0.373668	Igh-VJ558	Igh protein [Mus musculus]	None	0	FALSE	13.114	12	3	3	3	489	53.2	5.38	11.53	3
18043871	0.015873	0.283682	1.29564	0.373668	Igh-VJ558	Igh protein [Mus musculus]	None	0	FALSE	13.114	13	3	3	3	484	52.8	5.12	11.53	3
29165690	0.015873	0.283682	1.29564	0.373668	Igh-VJ558	Igh protein [Mus musculus]	None	0	FALSE	13.114	13	3	3	3	487	53	5.22	11.53	3
34784416	0.015873	0.283682	1.29564	0.373668		Igh protein [Mus musculus]	None	0	FALSE	13.114	13	3	3	3	485	52.9	5.2	11.53	3
37589305	0.015873	0.283682	1.29564	0.373668	LOC544903	Igh protein [Mus musculus]	None	0	FALSE	13.114	13	3	3	3	485	52.4	5.27	11.53	3
55153945	0.015873	0.283682	1.29564	0.373668	LOC544903	Igh protein [Mus musculus]	None	0	FALSE	13.114	13	3	3	3	484	52	5.25	11.53	3
55154484	0.015873	0.283682	1.29564	0.373668	LOC544903	Igh protein [Mus musculus]	None	0	FALSE	13.114	13	3	3	3	483	52.7	5.06	11.53	3
62024603	0.015873	0.283682	1.29564	0.373668	LOC544903	Igh protein [Mus musculus]	None	0	FALSE	13.114	13	3	3	3	487	52.6	5.26	11.53	3
62027570	0.015873	0.283682	1.29564	0.373668		Igh protein [Mus musculus]	None	0	FALSE	13.114	13	3	3	3	485	52.3	5.34	11.53	3
62471425	0.015873	0.283682	1.29564	0.373668	LOC544903	Igh protein [Mus musculus]	None	0	FALSE	13.114	13	3	3	3	483	52.3	5.47	11.53	3
62739252	0.015873	0.283682	1.29564	0.373668	LOC544903	Igh protein [Mus musculus]	None	0	FALSE	13.114	13	3	3	3	483	52.1	5.27	11.53	3
66396647	0.015873	0.283682	1.29564	0.373668	LOC544903	Igh protein [Mus musculus]	None	0	FALSE	13.114	13	3	3	3	483	52.4	5.55	11.53	3
66794516	0.015873	0.283682	1.29564	0.373668	LOC544903	Igh protein [Mus musculus]	None	0	FALSE	13.114	13	3	3	3	476	51.4	5.15	11.53	3
76779882	0.015873	0.283682	1.29564	0.373668		Igh protein [Mus musculus]	None	0	FALSE	13.114	13	3	3	3	479	51.7	5.12	11.53	3
80474423	0.015873	0.283682	1.29564	0.373668		Igh protein [Mus musculus]	None	0	FALSE	13.114	13	3	3	3	482	52	5.55	11.53	3
83405895	0.015873	0.283682	1.29564	0.373668	Igh-VJ558	Unknown (protein for MGC:118134) [Mus musculus]	None	0	FALSE	13.114	13	3	3	3	482	52.1	5.55	11.53	3
86577658	0.015873	0.283682	1.29564	0.373668		Igh protein [Mus musculus]	None	0	FALSE	13.114	13	3	3	3	486	53	5.08	11.53	3
14714763	0.00793651	0.283682	1.27184	0.346922	Cyp3a11	Cytochrome P450, family 3, subfamily a, polypeptide 11 [Mus musculus]	Master Protein	0	FALSE	55.081	28	11	21	11	504	57.8	8.82	67.73	11
62739262	0.00793651	0.283682	1.27184	0.346922	Cyp3a11	Cytochrome P450, family 3, subfamily a, polypeptide 11 [Mus musculus]	Master Protein Candidate	0	FALSE	55.081	28	11	21	11	504	57.8	8.82	67.73	11
148670809	0.015873	0.283682	1.26391	0.337888		mCG4926, partial [Mus musculus]	None	0	FALSE	15.628	12	4	7	4	332	36	9.04	18.15	4
170295838	0.00793651	0.283682	1.25584	0.328651	Cyp3a41b; Cyp3a41a	cytochrome P450 3A41 [Mus musculus]	None	0	FALSE	21.75	11	4	8	4	504	57.9	7.68	27.32	4
187951853	0.00793651	0.283682	1.25584	0.328651	Cyp3a41b; Cyp3a41a	Cytochrome P450, family 3, subfamily a, polypeptide 41B [Mus musculus]	None	0	FALSE	21.75	11	4	8	4	504	57.9	7.42	27.32	4
568939036	0.00793651	0.283682	1.25584	0.328651	Cyp3a41a; Cyp3a41b	PREDICTED: cytochrome P450 3A41 isoform X1 [Mus musculus]	None	0	FALSE	21.75	13	4	8	4	426	48.9	6.67	27.32	4
1039770046	0.00793651	0.283682	1.25584	0.328651	Cyp3a41b	PREDICTED: cytochrome P450 3A41 isoform X1 [Mus musculus]	None	0	FALSE	21.75	12	4	8	4	455	52.3	6.47	27.32	4
148666881	0.015873	0.283682	1.24432	0.315363		mCG130432, partial [Mus musculus]	None	0	FALSE	22.4	30	4	8	4	128	14.9	9.57	26.86	4
1526541	0.00793651	0.283682	1.24267	0.313442	Ywhah	14-3-3 eta [Mus musculus]	None	0	FALSE	38.424	41	10	20	6	246	28.2	4.86	54.36	10
74140682	0.00793651	0.283682	1.24267	0.313442	Ywhah	unnamed protein product [Mus musculus]	Master Protein Candidate	0	FALSE	40.447	43	11	22	6	246	28.2	4.89	59.24	11
1345621987	0.00793651	0.283682	1.24267	0.313442		Chain D, 14-3-3 protein eta	Master Protein	0	FALSE	40.447	42	11	22	6	252	28.8	4.86	59.24	11
191493	0.031746	0.353216	1.23785	0.307835	Fabp4	13K protein, partial [Mus musculus]	Master Protein Candidate	0	FALSE	8.098	16	2	4	2	122	13.5	8.63	11.68	2
387401	0.031746	0.353216	1.23785	0.307835	Fabp4	adipocyte lipid binding protein, partial [Mus musculus]	Master Protein Candidate	0	FALSE	8.098	14	2	4	2	132	14.7	8.4	11.68	2
387504	0.031746	0.353216	1.23785	0.307835	Fabp4	adipocyte P2, partial [Mus musculus]	Master Protein Candidate	0	FALSE	8.098	14	2	4	2	132	14.6	8.4	11.68	2
3318753	0.031746	0.353216	1.23785	0.307835		Chain B, Pyridoxamine Modified Murine Adipocyte Lipid Binding Protein	Master Protein Candidate	0	FALSE	8.098	15	2	4	2	131	14.5	8.62	11.68	2
33356927	0.031746	0.353216	1.23785	0.307835		Chain A, Adipocyte Lipid-binding Protein	Master Protein Candidate	0	FALSE	8.098	15	2	4	2	131	14.5	8.4	11.68	2
157829776	0.031746	0.353216	1.23785	0.307835		Chain A, C1gV32DF57H MUTANT OF MURINE ADIPOCYTE LIPID BINDING Protein At Ph 4.5	Master Protein Candidate	0	FALSE	8.098	15	2	4	2	131	14.5	8.09	11.68	2
157829797	0.031746	0.353216	1.23785	0.307835		Chain A, V32dF57H MUTANT OF MURINE ADIPOCYTE LIPID BINDING PROTEIN	Master Protein Candidate	0	FALSE	8.098	15	2	4	2	131	14.5	8.32	11.68	2
160285839	0.031746	0.353216	1.23785	0.307835		Chain A, Fatty Acid-binding Protein	Master Protein	0	FALSE	8.098	12	2	4	2	155	17	9.16	11.68	2
259090256	0.031746	0.353216	1.23785	0.307835		Chain A, Identification And Characterization Of A Small Molecule Inhibitor Of Fatty Acid Binding Proteins	Master Protein Candidate	0	FALSE	8.098	15	2	4	2	131	14.5	8.4	11.68	2
568920555	0.031746	0.353216	1.23785	0.307835	Fabp4	PREDICTED: fatty acid-binding protein, adipocyte isoform X1 [Mus musculus]	Master Protein Candidate	0	FALSE	8.098	13	2	4	2	149	16.3	8.43	11.68	2
848130714	0.031746	0.353216	1.23785	0.307835	Fabp4	Chain B, Fatty Acid-binding Protein, Adipocyte	Master Protein Candidate	0	FALSE	8.098	14	2	4	2	132	14.6	8.4	11.68	2
973744285	0.031746	0.353216	1.23785	0.307835		Chain A, Fatty Acid-binding Protein, Adipocyte	Master Protein Candidate	0	FALSE	8.098	14	2	4	2	134	14.8	8.4	11.68	2
2145139	0.031746	0.353216	1.22782	0.2961	Apoa1	apolipoprotein A-I [Mus musculus]	None	0	FALSE	10.02	11	3	4	3	263	30.5	5.73	7.55	3
74225915	0.0285714	0.353216	1.22748	0.295703	Apoe	unnamed protein product, partial [Mus musculus]	None	0	FALSE	12.503	15	2	3	2	158	18	4.63	10.09	2
148691232	0.015873	0.283682	1.22727	0.295456	Apoe	apolipoprotein E, isoform CRA_d, partial [Mus musculus]	None	0	FALSE	19.99	28	4	7	4	154	17.5	4.68	20.55	4
569007471	0.00793651	0.283682	1.21826	0.28482	Cyp2c68	PREDICTED: cytochrome P450, family 2, subfamily c, polypeptide 68 isoform X1 [Mus musculus]	None	0	FALSE	21.927	12	5	9	5	437	50	7.2	26.69	5
74146419	0.015873	0.283682	1.21618	0.282363	Apoe	unnamed protein product [Mus musculus]	None	0	FALSE	59.126	39	12	26	12	311	35.9	5.68	76.56	12
192005	0.015873	0.283682	1.20434	0.26824	Apoe	apolipoprotein E, partial [Mus musculus domesticus]	Master Protein Candidate	0	FALSE	65.192	47	13	28	13	286	33.2	6.05	84.56	13
20381029	0.015873	0.283682	1.20434	0.26824	Apoe	Apolipoprotein E [Mus musculus]	None	0	FALSE	62.853	41	12	26	12	311	35.8	5.68	79.39	12
71059753	0.015873	0.283682	1.20434	0.26824	Apoe	Apoe [Mus musculus]	Master Protein Candidate	0	FALSE	65.192	43	13	28	13	311	35.8	5.67	84.56	13
74178217	0.015873	0.283682	1.20434	0.26824	Apoe	unnamed protein product [Mus musculus]	Master Protein Candidate	0	FALSE	65.192	43	13	28	13	311	35.9	5.68	84.56	13
148691234	0.015873	0.283682	1.20434	0.26824	Apoe	apolipoprotein E, isoform CRA_f [Mus musculus]	Master Protein Candidate	0	FALSE	65.192	56	13	28	13	238	27.4	8.92	84.56	13
163644329	0.015873	0.283682	1.20434	0.26824	Apoe	apolipoprotein E precursor [Mus musculus]	Master Protein	0	FALSE	65.192	43	13	28	13	311	35.8	5.68	84.56	13
18044474	0.00793651	0.283682	1.20365	0.267413	Cyp2c68	Cytochrome P450, family 2, subfamily c, polypeptide 68 [Mus musculus]	None	0	FALSE	26.308	13	6	11	6	491	55.9	7.21	31.04	6
186287327	0.00793651	0.283682	1.20365	0.267413	Cyp2c68	cytochrome P450, family 2, subfamily c, polypeptide 68 precursor [Mus musculus]	None	0	FALSE	26.308	13	6	11	6	491	56	7.36	31.04	6
148685995	0.0238095	0.353216	1.2016	0.264961	Cyp2e1	cytochrome P450, family 2, subfamily e, polypeptide 1, isoform CRA_b [Mus musculus]	None	0	FALSE	25.84	37	7	17	7	167	19.2	10.21	48	7
4249595	0.015873	0.283682	1.20021	0.263281	Cyp2c40	CYP2C40 [Mus musculus]	Master Protein Candidate	0	FALSE	29.824	15	7	12	7	491	55.7	7.52	33.05	7
77415525	0.015873	0.283682	1.20021	0.263281	Cyp2c67	Cytochrome P450, family 2, subfamily c, polypeptide 67 [Mus musculus]	Master Protein Candidate	0	FALSE	29.824	15	7	12	7	491	56.1	7.36	33.05	7
148709874	0.015873	0.283682	1.20021	0.263281		mCG10001 [Mus musculus]	Master Protein	0	FALSE	29.824	14	7	12	7	840	96.1	7.15	33.05	7
148709875	0.015873	0.283682	1.20021	0.263281		mCG130234 [Mus musculus]	None	0	FALSE	27.918	17	6	10	6	400	45.6	7.66	28.55	6
148709876	0.015873	0.283682	1.20021	0.263281		mCG130239 [Mus musculus]	None	0	FALSE	27.918	14	6	10	6	481	55.1	8.19	28.55	6
157074229	0.015873	0.283682	1.20021	0.263281	Cyp2c69	cytochrome P450, family 2, subfamily c, polypeptide 69 precursor [Mus musculus]	None	0	FALSE	27.918	14	6	10	6	491	56.1	7.93	28.55	6
187952237	0.015873	0.283682	1.20021	0.263281	Cyp2c40	Cytochrome P450, family 2, subfamily c, polypeptide 40 [Mus musculus]	Master Protein Candidate	0	FALSE	29.824	15	7	12	7	491	55.7	7.52	33.05	7
755563447	0.015873	0.283682	1.20021	0.263281	Cyp2c67	PREDICTED: cytochrome P450, family 2, subfamily c, polypeptide 67 isoform X1 [Mus musculus]	Master Protein Candidate	0	FALSE	29.824	15	7	12	7	481	55	7.52	33.05	7
148691229	0.015873	0.283682	1.18804	0.248588	Apoe	apolipoprotein E, isoform CRA_a, partial [Mus musculus]	None	0	FALSE	42.923	33	8	16	8	235	26.9	4.92	45.9	8
35505439	0.015873	0.283682	1.18699	0.24731	Supt5; Supt5h	Supt5h protein, partial [Mus musculus]	Master Protein	0	FALSE	3.831	2	2	3	2	1098	122.1	5.1	4.93	2
148686128	0.015873	0.283682	1.17583	0.233686	Slc25a22	solute carrier family 25 (mitochondrial carrier, glutamate), member 22, isoform CRA_b [Mus musculus]	None	0	FALSE	15.312	27	4	5	4	217	23	8.47	13.2	4
148686130	0.015873	0.283682	1.17583	0.233686	Slc25a22	solute carrier family 25 (mitochondrial carrier, glutamate), member 22, isoform CRA_d, partial [Mus musculus]	None	0	FALSE	15.312	23	4	5	4	256	27.6	9.32	13.2	4
148686131	0.015873	0.283682	1.17583	0.233686	Slc25a22	solute carrier family 25 (mitochondrial carrier, glutamate), member 22, isoform CRA_e, partial [Mus musculus]	None	0	FALSE	15.312	20	4	5	4	289	30.7	8.32	13.2	4
1341395581	0.015873	0.283682	1.17583	0.233686		mitochondrial glutamate carrier 1 isoform b [Mus musculus]	None	0	FALSE	15.312	24	4	5	4	243	26	8.84	13.2	4
15488614	0.00793651	0.283682	1.17127	0.228075	Cyp2e1	Cytochrome P450, family 2, subfamily e, polypeptide 1 [Mus musculus]	Master Protein	0	FALSE	99.499	45	19	44	19	493	56.8	8.4	146.23	19
755515320	0.015873	0.283682	1.17052	0.227146	Pon1	PREDICTED: serum paraoxonase/arylesterase 1 isoform X1 [Mus musculus]	None	0	FALSE	11.198	10	3	4	3	325	36.2	5.01	12.09	3
12845461	0.00793651	0.283682	1.16339	0.218337	Slc25a22	unnamed protein product [Mus musculus]	Master Protein	0	FALSE	28.481	29	8	11	8	323	34.6	9.09	29.18	8
148685994	0.015873	0.283682	1.16318	0.218069	Cyp2e1	cytochrome P450, family 2, subfamily e, polypeptide 1, isoform CRA_a [Mus musculus]	None	0	FALSE	15.457	30	4	10	4	123	14	10.2	31.2	4
148685997	0.015873	0.283682	1.16318	0.218069	Cyp2e1	cytochrome P450, family 2, subfamily e, polypeptide 1, isoform CRA_d [Mus musculus]	None	0	FALSE	15.457	30	4	10	4	123	14	10.2	31.2	4
29748000	0.00793651	0.283682	1.16284	0.217652	Slc25a22	Slc25a22 protein [Mus musculus]	None	0	FALSE	13.169	36	4	6	4	98	10.7	9.45	15.97	4
111183380	0.00793651	0.283682	1.16261	0.217368	Cyp2e1	cytochrome P450 2E1 [Mus musculus]	None	0	FALSE	58.046	37	12	33	12	333	38.1	9.51	112.43	12
71042009	0.0285714	0.353216	1.16251	0.217248		Chain A, Crystal Structure Of The 22kda N-Terminal Fragment Of Mouse Apolipoprotein E	None	0	FALSE	24.707	25	4	8	4	181	21	5.53	26.76	4
74151965	0.031746	0.353216	1.16109	0.215485	Grn	unnamed protein product [Mus musculus]	None	0	FALSE	8.316	5	2	3	2	602	64.9	6.93	13.58	2
148702182	0.031746	0.353216	1.16109	0.215485	Grn	granulin, isoform CRA_a [Mus musculus]	None	0	FALSE	8.316	8	2	3	2	434	46.6	6.76	13.58	2
148691233	0.031746	0.353216	1.15955	0.213566	Apoe	apolipoprotein E, isoform CRA_e [Mus musculus]	None	0	FALSE	40.485	57	9	20	9	155	17.6	5.25	57.8	9
2570413	0.00793651	0.283682	1.15778	0.211361	Acadl	long-chain acyl-CoA dehydrogenase, partial [Mus musculus]	None	0	FALSE	27.09	34	6	15	6	201	22	8.87	46.53	6
148686133	0.00793651	0.283682	1.15729	0.210753	Slc25a22	solute carrier family 25 (mitochondrial carrier, glutamate), member 22, isoform CRA_f [Mus musculus]	None	0	FALSE	14.596	22	5	7	5	195	21.5	10.17	17.91	5
74197037	0.015873	0.283682	1.15615	0.209324	Apoe	unnamed protein product [Mus musculus]	None	0	FALSE	61.403	40	12	26	12	311	35.8	5.54	78.46	12
20071667	0.00793651	0.283682	1.15276	0.205096	Acadl	Acyl-Coenzyme A dehydrogenase, long-chain [Mus musculus]	Master Protein Candidate	0	FALSE	103.636	39	16	43	16	430	47.9	8.31	135.02	16
31982520	0.00793651	0.283682	1.15276	0.205096	Acadl	long-chain specific acyl-CoA dehydrogenase, mitochondrial precursor [Mus musculus]	Master Protein Candidate	0	FALSE	103.636	39	16	43	16	430	47.9	8.15	135.02	16
148667825	0.00793651	0.283682	1.15276	0.205096		mCG121561 [Mus musculus]	Master Protein	0	FALSE	103.636	39	16	43	16	430	47.9	8.15	135.02	16
148670079	0.015873	0.283682	1.15276	0.205096		mCG16689, isoform CRA_b [Mus musculus]	None	0	FALSE	39.302	32	6	16	6	264	27.9	8.1	62.03	6
148670080	0.015873	0.283682	1.15276	0.205096		mCG16689, isoform CRA_c [Mus musculus]	None	0	FALSE	39.302	33	6	16	6	257	27.5	7.55	62.03	6
12857969	0.00793651	0.283682	1.15168	0.203739	Acadl	unnamed protein product, partial [Mus musculus]	None	0	FALSE	96.308	40	14	38	14	375	41.9	6.67	116.17	14
148701042	0.00793651	0.283682	1.15056	0.202338	Ndufv1	NADH dehydrogenase (ubiquinone) flavoprotein 1, isoform CRA_a [Mus musculus]	None	0	FALSE	29.241	31	6	6	6	334	36.3	6.44	18.63	6
726095	0.00793651	0.283682	1.14951	0.201022	Acadl	long-chain acyl-CoA dehydrogenase [Mus musculus]	None	0	FALSE	102.358	37	15	42	15	430	48.1	8.15	132.65	15
568932855	0.015873	0.283682	1.14935	0.200819	Crot	PREDICTED: peroxisomal carnitine O-octanoyltransferase isoform X1 [Mus musculus]	None	0	FALSE	20.65	9	4	8	4	540	60.9	7.44	20.27	4
20379935	0.015873	0.283682	1.14807	0.199214	Hadh	Hadh protein, partial [Mus musculus]	Master Protein Candidate	0	FALSE	99.113	61	15	50	15	289	31.8	7.55	146.83	15
74141913	0.015873	0.283682	1.14807	0.199214	Hadh	unnamed protein product [Mus musculus]	Master Protein Candidate	0	FALSE	99.113	56	15	50	15	314	34.5	8.65	146.83	15
74212047	0.015873	0.283682	1.14807	0.199214	Hadh	unnamed protein product [Mus musculus]	Master Protein Candidate	0	FALSE	99.113	56	15	50	15	314	34.5	8.65	146.83	15
111038118	0.015873	0.283682	1.14807	0.199214	Hadh	hydroxyacyl-coenzyme A dehydrogenase, mitochondrial precursor [Mus musculus]	Master Protein	0	FALSE	99.113	56	15	50	15	314	34.4	8.65	146.83	15
74200030	0.015873	0.283682	1.14471	0.19498	Acadm	unnamed protein product, partial [Mus musculus]	None	0	FALSE	27.849	20	4	13	4	234	25.6	7.66	41.58	4
26345604	0.015873	0.283682	1.14256	0.192264	Bdh1	unnamed protein product [Mus musculus]	Master Protein	0	FALSE	92.703	58	16	43	16	343	38.2	9.11	121.1	16
74206030	0.015873	0.283682	1.14256	0.192264	Bdh1	unnamed protein product [Mus musculus]	Master Protein Candidate	0	FALSE	92.703	58	16	43	16	343	38.3	9.01	121.1	16
148680153	0.015873	0.283682	1.13964	0.188583	Adh1	alcohol dehydrogenase 1 (class I), isoform CRA_a [Mus musculus]	None	0	FALSE	118.31	66	13	63	13	257	27.2	8.59	228.46	13
74138198	0.015873	0.283682	1.13778	0.186225	Ndufs5; BC002163; LOC100504968; LOC102641315	unnamed protein product [Mus musculus]	Master Protein Candidate	0	FALSE	11.113	29	3	4	3	106	12.6	8.92	9.92	3
148698428	0.015873	0.283682	1.13778	0.186225		mCG5769, isoform CRA_b, partial [Mus musculus]	Master Protein Candidate	0	FALSE	11.113	28	3	4	3	112	13.3	8.97	9.92	3
1148885687	0.015873	0.283682	1.13778	0.186225		hypothetical protein [Mus musculus]	Master Protein	0	FALSE	11.113	18	3	4	3	171	20	9.2	9.92	3
436577	0.00793651	0.283682	1.13376	0.181113	Cpox	coproporphyrinogen oxidase [Mus musculus]	Master Protein Candidate	0	FALSE	29.33	19	6	12	6	354	40.6	7.52	23.72	6
74178750	0.00793651	0.283682	1.13376	0.181113	Cpox	unnamed protein product [Mus musculus]	None	0	FALSE	24.854	14	5	11	5	380	42.3	8.78	21.15	5
133777006	0.00793651	0.283682	1.13376	0.181113	Cpox	Coproporphyrinogen oxidase [Mus musculus]	Master Protein Candidate	0	FALSE	29.33	19	6	12	6	354	40.6	7.3	23.72	6
161484660	0.00793651	0.283682	1.13376	0.181113	Cpox	oxygen-dependent coproporphyrinogen-III oxidase, mitochondrial precursor [Mus musculus]	Master Protein	0	FALSE	29.33	15	6	12	6	443	49.7	8.53	23.72	6
1170154	0.0285714	0.353216	1.13333	0.180572	Hist1h1b	RecName: Full=Histone H1.5; AltName: Full=H1 VAR.5; AltName: Full=H1b	Master Protein	0	FALSE	30.337	26	6	20	3	223	22.6	10.92	41.22	6
90651989	0.0285714	0.353216	1.13333	0.180572	Hist1h1b	Hist1h1b protein, partial [Mus musculus]	Master Protein Candidate	0	FALSE	30.337	26	6	20	3	222	22.4	10.92	41.22	6
148703115	0.015873	0.283682	1.13312	0.180301	Acad9	acyl-Coenzyme A dehydrogenase family, member 9, isoform CRA_b [Mus musculus]	None	0	FALSE	11.23	4	2	3	2	553	60.7	8.76	9.48	2
148685999	0.015873	0.283682	1.13262	0.179664	Cyp2e1	cytochrome P450, family 2, subfamily e, polypeptide 1, isoform CRA_f [Mus musculus]	None	0	FALSE	81.59	48	13	30	13	356	41	6.3	107.42	13
19880017	0.015873	0.283682	1.12967	0.175902	Acat3	acetyl CoA transferase-like protein [Mus musculus]	None	0	FALSE	105.832	58	13	34	13	397	41.4	7.72	120.95	13
74180730	0.015873	0.283682	1.12967	0.175902	Acat3	unnamed protein product [Mus musculus]	None	0	FALSE	105.832	58	13	34	13	397	41.4	7.94	120.95	13
148670084	0.015873	0.283682	1.12939	0.175539		mCG16687, isoform CRA_c [Mus musculus]	None	0	FALSE	55.338	52	8	21	8	248	26.2	7.53	77.54	8
148699630	0.031746	0.353216	1.12929	0.17542	Gamt	guanidinoacetate methyltransferase, isoform CRA_a [Mus musculus]	None	0	FALSE	23.884	20	3	6	3	298	32.9	7.08	29.5	3
568966678	0.031746	0.353216	1.12929	0.17542	Gamt	PREDICTED: guanidinoacetate N-methyltransferase isoform X2 [Mus musculus]	None	0	FALSE	23.884	28	3	6	3	216	23.9	6.02	29.5	3
225879	0.031746	0.353216	1.12894	0.174969	Adh1	alcohol dehydrogenase	Master Protein	0	FALSE	181.847	72	19	107	19	375	39.7	8.1	409.06	19
148676005	0.00793651	0.283682	1.12752	0.173158	Phyh	phytanoyl-CoA hydroxylase, isoform CRA_b, partial [Mus musculus]	None	0	FALSE	16.277	16	4	6	4	266	30.4	6.95	17.88	4
1401252	0.015873	0.283682	1.12719	0.172735	Ndufa4	mlrq-like protein, partial [Mus musculus]	None	0	FALSE	17.342	40	3	12	3	75	8.5	9.31	37.56	3
50852	0.031746	0.353216	1.12708	0.172594	Grn	Epithelin 1 & 2 [Mus musculus]	Master Protein Candidate	0	FALSE	16.19	10	4	6	4	589	63.5	6.87	25.39	4
191767	0.031746	0.353216	1.12708	0.172594	Grn	acrogranin [Mus musculus]	Master Protein Candidate	0	FALSE	16.19	10	4	6	4	589	63.4	6.8	25.39	4
26384542	0.031746	0.353216	1.12708	0.172594	Grn	unnamed protein product [Mus musculus]	Master Protein	0	FALSE	16.19	10	4	6	4	602	64.9	6.93	25.39	4
74178001	0.031746	0.353216	1.12708	0.172594	Grn	unnamed protein product [Mus musculus]	Master Protein Candidate	0	FALSE	16.19	10	4	6	4	589	63.5	6.8	25.39	4
74191486	0.031746	0.353216	1.12708	0.172594	Grn	unnamed protein product [Mus musculus]	Master Protein Candidate	0	FALSE	16.19	10	4	6	4	602	65	6.99	25.39	4
74196989	0.031746	0.353216	1.12708	0.172594	Grn	unnamed protein product [Mus musculus]	Master Protein Candidate	0	FALSE	16.19	10	4	6	4	589	63.4	6.92	25.39	4
74197999	0.031746	0.353216	1.12708	0.172594	Grn	unnamed protein product [Mus musculus]	Master Protein Candidate	0	FALSE	16.19	10	4	6	4	589	63.4	6.74	25.39	4
74198883	0.031746	0.353216	1.12708	0.172594	Grn	unnamed protein product, partial [Mus musculus]	Master Protein Candidate	0	FALSE	16.19	10	4	6	4	593	63.9	6.93	25.39	4
74204639	0.031746	0.353216	1.12708	0.172594	Grn	unnamed protein product [Mus musculus]	Master Protein Candidate	0	FALSE	16.19	10	4	6	4	602	65	6.99	25.39	4
74207451	0.031746	0.353216	1.12708	0.172594	Grn	unnamed protein product [Mus musculus]	Master Protein Candidate	0	FALSE	16.19	10	4	6	4	602	65	6.87	25.39	4
74213510	0.031746	0.353216	1.12708	0.172594	Grn	unnamed protein product [Mus musculus]	Master Protein Candidate	0	FALSE	16.19	10	4	6	4	589	63.3	6.87	25.39	4
74213772	0.031746	0.353216	1.12708	0.172594	Grn	unnamed protein product, partial [Mus musculus]	None	0	FALSE	12.736	11	3	5	3	462	49.6	6.51	21.07	3
74213903	0.031746	0.353216	1.12708	0.172594	Grn	unnamed protein product [Mus musculus]	Master Protein Candidate	0	FALSE	16.19	10	4	6	4	602	65	7.05	25.39	4
74220419	0.031746	0.353216	1.12708	0.172594	Grn	unnamed protein product [Mus musculus]	Master Protein Candidate	0	FALSE	16.19	10	4	6	4	602	65	6.99	25.39	4
148702183	0.031746	0.353216	1.12708	0.172594	Grn	granulin, isoform CRA_b [Mus musculus]	Master Protein Candidate	0	FALSE	16.19	13	4	6	4	472	51	6.95	25.39	4
148702184	0.031746	0.353216	1.12708	0.172594	Grn	granulin, isoform CRA_c [Mus musculus]	Master Protein Candidate	0	FALSE	16.19	11	4	6	4	566	60.9	6.9	25.39	4
148702185	0.031746	0.353216	1.12708	0.172594	Grn	granulin, isoform CRA_d [Mus musculus]	Master Protein Candidate	0	FALSE	16.19	11	4	6	4	569	61.3	6.86	25.39	4
148702187	0.031746	0.353216	1.12708	0.172594	Grn	granulin, isoform CRA_e [Mus musculus]	Master Protein Candidate	0	FALSE	16.19	10	4	6	4	589	63.4	6.8	25.39	4
5830360	0.015873	0.283682	1.12665	0.172042	Ehhadh	L-specific multifunctional beta-oxdiation protein [Mus musculus]	None	0	FALSE	40.131	44	9	12	9	284	32	9.1	35.96	9
148680154	0.031746	0.353216	1.12655	0.171906	Adh1	alcohol dehydrogenase 1 (class I), isoform CRA_b [Mus musculus]	None	0	FALSE	159.088	74	18	97	18	335	35.3	7.87	350.16	18
1285033727	0.031746	0.353216	1.12654	0.171903		Chain B, Kynurenine--oxoglutarate transaminase 3	None	0	FALSE	56.722	34	11	27	11	410	46.1	6.47	87.08	11
200679	0.015873	0.283682	1.12462	0.169438	Rbp4	retinol-binding protein, partial [Mus musculus]	None	0	FALSE	22.016	38	5	9	5	179	20.4	5.15	26.52	5
20071589	0.015873	0.283682	1.12407	0.168735	Bdh1	Bdh1 protein, partial [Mus musculus]	None	0	FALSE	73.267	63	13	33	13	254	28.7	8.12	92.4	13
148686998	0.015873	0.283682	1.1232	0.167619	Rpl31-ps1	mCG50210 [Mus musculus]	None	0	FALSE	8.559	20	3	7	3	125	14.4	10.52	20.36	3
27694022	0.015873	0.283682	1.12288	0.167206	Bdh1	3-hydroxybutyrate dehydrogenase, type 1 [Mus musculus]	None	0	FALSE	85.282	55	15	38	15	343	38.3	9.01	107.51	15
148665334	0.015873	0.283682	1.12288	0.167206	Bdh1	3-hydroxybutyrate dehydrogenase, type 1, partial [Mus musculus]	None	0	FALSE	85.282	60	15	38	15	315	35.2	8.53	107.51	15
148685996	0.015873	0.283682	1.12286	0.167182	Cyp2e1	cytochrome P450, family 2, subfamily e, polypeptide 1, isoform CRA_c [Mus musculus]	None	0	FALSE	44.081	34	10	24	10	307	35	8.98	87.54	10
148666813	0.00793651	0.283682	1.12202	0.166103	Cnbp	cellular nucleic acid binding protein, isoform CRA_b [Mus musculus]	None	0	FALSE	18.978	30	4	10	4	140	15.4	8.19	19.31	4
148666814	0.00793651	0.283682	1.12202	0.166103	Cnbp	cellular nucleic acid binding protein, isoform CRA_c, partial [Mus musculus]	None	0	FALSE	18.978	28	4	10	4	149	16.4	7.8	19.31	4
148666816	0.00793651	0.283682	1.12202	0.166103	Cnbp	cellular nucleic acid binding protein, isoform CRA_e, partial [Mus musculus]	None	0	FALSE	18.978	30	4	10	4	142	15.6	7.8	19.31	4
148676642	0.031746	0.353216	1.12108	0.164884		mCG18564, isoform CRA_d [Mus musculus]	None	0	FALSE	8.94	18	2	8	2	88	9.4	10.1	21.84	2
159163379	0.031746	0.353216	1.12108	0.164884		Chain A, 60S ribosomal protein L12	None	0	FALSE	8.94	17	2	8	2	92	9.3	9.48	21.84	2
1125026	0.031746	0.353216	1.12067	0.164365	Hadh	3-hydroxyacyl CoA dehydrogenase [Mus musculus]	None	0	FALSE	94.217	48	14	48	14	303	33.1	7.96	140.49	14
1906808	0.015873	0.283682	1.11966	0.163058	Phyh	LN1 [Mus musculus]	Master Protein	0	FALSE	18.868	15	5	7	5	338	38.6	7.74	20.45	5
74219835	0.015873	0.283682	1.11966	0.163058	Phyh	unnamed protein product [Mus musculus]	Master Protein Candidate	0	FALSE	18.868	15	5	7	5	338	38.6	7.53	20.45	5
74222619	0.015873	0.283682	1.11966	0.163058	Phyh	unnamed protein product [Mus musculus]	Master Protein Candidate	0	FALSE	18.868	15	5	7	5	338	38.6	7.53	20.45	5
74204023	0.015873	0.283682	1.11825	0.161238	Acly	unnamed protein product, partial [Mus musculus]	None	0	FALSE	111.776	29	29	52	29	1034	113	7.77	143.22	29
148670087	0.015873	0.283682	1.11758	0.160381		mCG16687, isoform CRA_f [Mus musculus]	Master Protein	0	FALSE	116.996	63	14	36	14	397	41.4	7.72	133.04	14
14318642	0.0285714	0.353216	1.11726	0.15997	Abcd3	ATP-binding cassette, sub-family D (ALD), member 3 [Mus musculus]	Master Protein Candidate	0	FALSE	72.443	26	14	30	14	659	75.4	9.26	84.39	14
60218877	0.0285714	0.353216	1.11726	0.15997	Abcd3	ATP-binding cassette sub-family D member 3 isoform 1 [Mus musculus]	Master Protein Candidate	0	FALSE	72.443	26	14	30	14	659	75.4	9.26	84.39	14
74142231	0.0285714	0.353216	1.11726	0.15997	Abcd3	unnamed protein product [Mus musculus]	Master Protein Candidate	0	FALSE	72.443	26	14	30	14	659	75.3	9.22	84.39	14
74184263	0.0285714	0.353216	1.11726	0.15997	Abcd3	unnamed protein product [Mus musculus]	Master Protein Candidate	0	FALSE	72.443	26	14	30	14	659	75.4	9.26	84.39	14
148680385	0.0285714	0.353216	1.11726	0.15997	Abcd3	ATP-binding cassette, sub-family D (ALD), member 3, isoform CRA_b, partial [Mus musculus]	Master Protein	0	FALSE	72.443	25	14	30	14	685	77.9	9.26	84.39	14
74146613	0.015873	0.283682	1.11711	0.159769	Acly	unnamed protein product [Mus musculus]	None	0	FALSE	130.621	31	31	58	31	1091	119.5	7.55	160.9	31
74210124	0.015873	0.283682	1.11711	0.159769	Acly	unnamed protein product [Mus musculus]	Master Protein Candidate	0	FALSE	132.014	31	32	59	32	1101	120.7	7.44	160.9	32
148670608	0.015873	0.283682	1.11711	0.159769	Acly	ATP citrate lyase, isoform CRA_a [Mus musculus]	Master Protein	0	FALSE	132.014	31	32	59	32	1102	120.9	7.34	160.9	32
148670609	0.015873	0.283682	1.11711	0.159769	Acly	ATP citrate lyase, isoform CRA_b [Mus musculus]	Master Protein Candidate	0	FALSE	132.014	32	32	59	32	1091	119.7	7.44	160.9	32
74146368	0.031746	0.353216	1.11667	0.159199	Mat1a	unnamed protein product [Mus musculus]	Master Protein	0	FALSE	152.461	54	15	59	15	396	43.5	5.82	199.6	15
555835	0.015873	0.283682	1.11588	0.158182	Hmgcs2	HMG CoA synthase, partial [Mus musculus]	None	0	FALSE	188.251	55	21	108	21	432	47.9	7.59	388	21
33563266	0.00793651	0.283682	1.11534	0.157487	Ndufa4	cytochrome c oxidase subunit NDUFA4 [Mus musculus]	Master Protein	0	FALSE	21.395	45	4	15	4	82	9.3	9.52	45.73	4
118505329	0.015873	0.283682	1.11457	0.156489	Bdh1	3-hydroxybutyrate dehydrogenase, partial [Mus musculus]	None	0	FALSE	39.049	67	4	11	4	105	12.1	6.77	38.5	4
148670085	0.015873	0.283682	1.11429	0.156119		mCG16687, isoform CRA_d [Mus musculus]	None	0	FALSE	108.997	63	13	34	13	345	36	8.35	125.74	13
12839698	0.031746	0.353216	1.11354	0.15515	Acsl5	unnamed protein product [Mus musculus]	None	0	FALSE	29.644	29	8	14	6	268	29.6	5.96	36.43	8
124376120	0.015873	0.283682	1.11352	0.155126	Ccbl2; Kyat3	Cysteine conjugate-beta lyase 2 [Mus musculus]	Master Protein Candidate	0	FALSE	63.832	37	13	30	12	420	47.3	7.2	95.88	13
148680101	0.015873	0.283682	1.11352	0.155126	Ccbl2; Kyat3	cysteine conjugate-beta lyase 2, isoform CRA_d, partial [Mus musculus]	Master Protein Candidate	0	FALSE	63.832	37	13	30	12	421	47.4	7.43	95.88	13
148680102	0.015873	0.283682	1.11352	0.155126	Ccbl2; Kyat3	cysteine conjugate-beta lyase 2, isoform CRA_e [Mus musculus]	Master Protein	0	FALSE	63.832	34	13	30	12	455	51.1	8.37	95.88	13
1285033728	0.015873	0.283682	1.11352	0.155126		Chain A, Kynurenine--oxoglutarate transaminase 3	Master Protein Candidate	0	FALSE	63.832	38	13	30	12	411	46.2	6.62	95.88	13
1285033731	0.015873	0.283682	1.11352	0.155126		Chain B, Kynurenine--oxoglutarate transaminase 3	Master Protein Candidate	0	FALSE	63.832	38	13	30	12	410	46.1	6.62	95.88	13
148665768	0.00793651	0.283682	1.11253	0.15384	Cpox	coproporphyrinogen oxidase [Mus musculus]	None	0	FALSE	22.887	13	5	10	5	427	47.8	8.75	18.39	5
12836439	0.015873	0.283682	1.11052	0.151229	Hmgcs2	unnamed protein product [Mus musculus]	Master Protein Candidate	0	FALSE	222.995	55	24	129	24	508	56.8	8.41	466.84	24
15928472	0.015873	0.283682	1.11052	0.151229	Hmgcs2	3-hydroxy-3-methylglutaryl-Coenzyme A synthase 2 [Mus musculus]	Master Protein Candidate	0	FALSE	222.995	55	24	129	24	508	56.8	8.41	466.84	24
148707010	0.015873	0.283682	1.11052	0.151229	Hmgcs2	3-hydroxy-3-methylglutaryl-Coenzyme A synthase 2, isoform CRA_b, partial [Mus musculus]	Master Protein	0	FALSE	222.995	53	24	129	24	524	58.6	8.12	466.84	24
148670086	0.031746	0.353216	1.10976	0.150243		mCG16687, isoform CRA_e [Mus musculus]	None	0	FALSE	98.263	55	10	27	10	349	36.1	6.98	102.69	10
148675086	0.0238095	0.353216	1.10907	0.149352	Idh2	isocitrate dehydrogenase 2 (NADP+), mitochondrial, isoform CRA_b, partial [Mus musculus]	None	0	FALSE	33.744	35	6	17	6	192	21.1	7.05	50.9	6
1566185461	0.00793651	0.283682	1.10842	0.148506		mitochondrial amidoxime reducing component 2 isoform 2 precursor [Mus musculus]	None	0	FALSE	33.076	31	8	19	8	280	31.5	8.76	52.27	8
2645721	0.015873	0.283682	1.10655	0.146068	Slc27a2	very-long-chain acyl-CoA synthetase [Mus musculus]	None	0	FALSE	124.482	37	18	43	18	620	70.3	8.84	132.27	18
3087820	0.015873	0.283682	1.10655	0.146068	Slc27a2	very-long-chain acyl-CoA synthetase [Mus musculus]	None	0	FALSE	124.482	37	18	43	18	620	70.4	8.9	132.27	18
12835990	0.015873	0.283682	1.10652	0.146032	Abcd3	unnamed protein product [Mus musculus]	None	0	FALSE	67.756	24	13	27	13	659	75.4	9.17	75.61	13
3335565	0.00793651	0.283682	1.10626	0.145686	Slc27a2	fatty acid transport protein 2 [Mus musculus]	None	0	FALSE	127.96	36	17	43	17	623	70.5	8.88	141.88	17
148674684	0.015873	0.283682	1.1062	0.145617	Pck1	phosphoenolpyruvate carboxykinase 1, cytosolic, isoform CRA_b [Mus musculus]	None	0	FALSE	56.08	56	9	26	9	163	19	7.06	78.57	9
19354335	0.015873	0.283682	1.10578	0.145063	Slc27a2	Solute carrier family 27 (fatty acid transporter), member 2 [Mus musculus]	Master Protein	0	FALSE	140.518	40	19	49	19	620	70.4	8.9	157.76	19
21758044	0.015873	0.283682	1.1047	0.143656	Hmgcs2	unnamed protein product [Mus musculus]	None	0	FALSE	215.645	53	23	124	23	508	56.8	8.29	451.74	23
3342500	0.031746	0.353216	1.10428	0.1431	Ppp2ca	protein phosphatase type 2A catalytic subunit alpha isoform [Mus musculus]	Master Protein Candidate	0	FALSE	15.549	12	3	5	3	309	35.6	5.54	14.92	3
148701683	0.031746	0.353216	1.10428	0.1431	Ppp2ca	protein phosphatase 2 (formerly 2A), catalytic subunit, alpha isoform, isoform CRA_b [Mus musculus]	Master Protein	0	FALSE	15.549	12	3	5	3	309	35.6	5.54	14.92	3
454835	0.015873	0.283682	1.10363	0.14226	Abcd3	peroxisome membrane protein [Mus musculus domesticus]	None	0	FALSE	68.806	24	13	28	13	659	75.4	9.29	77.62	13
74188015	0.031746	0.353216	1.10288	0.141282	Fmo5	unnamed protein product, partial [Mus musculus]	None	0	FALSE	41.548	44	11	20	11	252	28.4	7.87	55.97	11
19526848	0.00793651	0.283682	1.10011	0.137642	Marc2; Mosc2	mitochondrial amidoxime reducing component 2 isoform 1 precursor [Mus musculus]	Master Protein	0	FALSE	37.443	28	9	28	9	338	38.2	8.68	67.34	9
29144981	0.00793651	0.283682	1.0999	0.137367	Ctnna1	Catenin (cadherin associated protein), alpha 1 [Mus musculus]	Master Protein Candidate	0	FALSE	25.185	12	6	9	6	906	100	6.23	21.95	6
74219812	0.00793651	0.283682	1.0999	0.137367	Ctnna1	unnamed protein product [Mus musculus]	Master Protein Candidate	0	FALSE	25.185	12	6	9	6	906	100	6.23	21.95	6
485602210	0.00793651	0.283682	1.0999	0.137367		Chain B, Catenin alpha-1	Master Protein	0	FALSE	25.185	12	6	9	6	912	100.6	6.29	21.95	6
569003067	0.00793651	0.283682	1.0999	0.137367	Ctnna1	PREDICTED: catenin alpha-1 isoform X2 [Mus musculus]	Master Protein Candidate	0	FALSE	25.185	21	6	9	6	536	59.5	5.6	21.95	6
148696210	0.015873	0.283682	1.09869	0.135785	Slc27a2	solute carrier family 27 (fatty acid transporter), member 2 [Mus musculus]	None	0	FALSE	123.903	37	16	42	16	577	65.5	8.88	139.41	16
148704100	0.00793651	0.283682	1.09848	0.135515	Msra	methionine sulfoxide reductase A, isoform CRA_b, partial [Mus musculus]	None	0	FALSE	35.903	43	7	13	7	205	23.2	7.46	38.37	7
358679363	0.00793651	0.283682	1.09848	0.135515	Msra	mitochondrial peptide methionine sulfoxide reductase isoform 2 [Mus musculus]	None	0	FALSE	35.903	42	7	13	7	210	23.5	8.41	38.37	7
358679367	0.00793651	0.283682	1.09848	0.135515	Msra	mitochondrial peptide methionine sulfoxide reductase isoform 4 [Mus musculus]	None	0	FALSE	35.903	47	7	13	7	191	21.6	8.16	38.37	7
755547652	0.00793651	0.283682	1.09848	0.135515	Msra	PREDICTED: mitochondrial peptide methionine sulfoxide reductase isoform X1 [Mus musculus]	None	0	FALSE	35.903	45	7	13	7	196	22.1	7.52	38.37	7
1109663858	0.00793651	0.283682	1.09848	0.135515		mitochondrial peptide methionine sulfoxide reductase isoform 5 [Mus musculus]	None	0	FALSE	35.903	53	7	13	7	169	19.2	7.84	38.37	7
1246764216	0.015873	0.283682	1.09848	0.135515		ATP-binding cassette sub-family D member 3 isoform 2 [Mus musculus]	None	0	FALSE	66.89	26	12	27	12	586	67.3	8.65	79.11	12
1540347155	0.015873	0.283682	1.09681	0.13331		Chain B, Catenin alpha-1	None	0	FALSE	16.192	24	4	7	4	263	28.8	8.91	17.4	4
74184280	0.031746	0.353216	1.09606	0.132329	Slc27a2	unnamed protein product, partial [Mus musculus]	None	0	FALSE	121.809	36	17	40	17	614	69.8	8.78	131.54	17
1272236	0.00793651	0.283682	1.09519	0.13118	Pon1	serum paraoxonase [Mus musculus]	Master Protein	0	FALSE	32.916	19	6	12	6	355	39.5	5.22	38.97	6
15215219	0.00793651	0.283682	1.09519	0.13118	Pon1	Paraoxonase 1 [Mus musculus]	Master Protein Candidate	0	FALSE	32.916	19	6	12	6	355	39.6	5.16	38.97	6
148682024	0.00793651	0.283682	1.09519	0.13118	Pon1	paraoxonase 1, isoform CRA_a [Mus musculus]	Master Protein Candidate	0	FALSE	32.916	19	6	12	6	355	39.5	5.22	38.97	6
568939471	0.00793651	0.283682	1.09519	0.13118	Pon1	PREDICTED: serum paraoxonase/arylesterase 1 isoform X2 [Mus musculus]	Master Protein Candidate	0	FALSE	32.916	23	6	12	6	288	32.1	5.91	38.97	6
50527	0.015873	0.283682	1.09479	0.130656	Cox5a	cytochrome c oxidase subunit Va preprotein [Mus musculus]	Master Protein Candidate	0	FALSE	46.107	53	5	22	5	145	16	6.54	76.92	5
148693959	0.015873	0.283682	1.09479	0.130656	Cox5a	cytochrome c oxidase, subunit Va [Mus musculus]	Master Protein	0	FALSE	46.107	53	5	22	5	146	16.1	6.54	76.92	5
3341462	0.031746	0.353216	1.09473	0.130571	Slc27a5	very-long-chain acyl-CoA synthetase related protein [Mus musculus]	None	0	FALSE	48.711	18	8	14	8	689	76.1	8.41	44.17	8
109732102	0.031746	0.353216	1.09473	0.130571	Slc27a5	Solute carrier family 27 (fatty acid transporter), member 5 [Mus musculus]	None	0	FALSE	49.816	19	9	15	9	689	76.1	8.48	44.17	9
148706138	0.031746	0.353216	1.09473	0.130571	Slc27a5	solute carrier family 27 (fatty acid transporter), member 5, isoform CRA_a [Mus musculus]	None	0	FALSE	49.816	19	9	15	9	689	76.2	8.46	44.17	9
1566185459	0.015873	0.283682	1.09293	0.1282		mitochondrial amidoxime reducing component 2 isoform 3 [Mus musculus]	None	0	FALSE	29.246	32	7	22	7	245	28	6.02	49.74	7
32562908	0.00793651	0.283682	1.09257	0.127729	Cpox	coproporphyrinogen oxidase, partial [Mus musculus]	None	0	FALSE	6.602	7	2	6	2	144	15.4	10.92	5.51	2
37030032	0.00793651	0.283682	1.09257	0.127729	Cpox	coproporphyrinogen oxidase precursor, partial [Mus musculus]	None	0	FALSE	6.602	7	2	6	2	139	14.8	11.09	5.51	2
3335571	0.031746	0.353216	1.09162	0.126468	Slc27a5	fatty acid transport protein 5 [Mus musculus]	Master Protein Candidate	0	FALSE	52.313	23	10	16	10	662	73.2	8.22	47.21	10
228008365	0.031746	0.353216	1.09162	0.126468	Slc27a5	bile acyl-CoA synthetase precursor [Mus musculus]	Master Protein	0	FALSE	52.313	22	10	16	10	689	76.2	8.38	47.21	10
148686113	0.031746	0.353216	1.09141	0.126193	Taldo1	transaldolase 1, isoform CRA_b [Mus musculus]	None	0	FALSE	15.408	18	2	7	2	105	11.5	5.48	20.93	2
148686115	0.031746	0.353216	1.09141	0.126193	Taldo1	transaldolase 1, isoform CRA_d [Mus musculus]	None	0	FALSE	15.408	13	2	7	2	148	16.1	7.09	20.93	2
56789390	0.0238095	0.353216	1.0911	0.125783	Ech1	Enoyl coenzyme A hydratase 1, peroxisomal [Mus musculus]	Master Protein	0	FALSE	66.281	44	13	33	13	327	36.1	7.71	87.19	13
148704099	0.00793651	0.283682	1.0901	0.124461	Msra	methionine sulfoxide reductase A, isoform CRA_a, partial [Mus musculus]	None	0	FALSE	33.125	33	6	12	6	234	26.1	7.27	35.53	6
358679365	0.00793651	0.283682	1.0901	0.124461	Msra	mitochondrial peptide methionine sulfoxide reductase isoform 3 [Mus musculus]	None	0	FALSE	33.125	40	6	12	6	193	21.5	7.58	35.53	6
148674683	0.015873	0.283682	1.08887	0.122827	Pck1	phosphoenolpyruvate carboxykinase 1, cytosolic, isoform CRA_a [Mus musculus]	None	0	FALSE	84.539	61	14	36	14	308	34.7	6.06	105.64	14
135835	0.015873	0.283682	1.08884	0.122793	Ptma	RecName: Full=Prothymosin alpha; Contains: RecName: Full=Prothymosin alpha, N-terminally processed; Contains: RecName: Full=Thymosin alpha	Master Protein Candidate	0	FALSE	24.966	22	3	9	3	111	12.2	3.79	29.47	3
74139882	0.015873	0.283682	1.08884	0.122793	Ptma	unnamed protein product [Mus musculus]	Master Protein Candidate	0	FALSE	24.966	22	3	9	3	111	12.3	3.84	29.47	3
74144701	0.015873	0.283682	1.08884	0.122793	Ptma	unnamed protein product, partial [Mus musculus]	Master Protein Candidate	0	FALSE	24.966	14	3	9	3	171	18.6	4.13	29.47	3
74191385	0.015873	0.283682	1.08884	0.122793	Ptma	unnamed protein product, partial [Mus musculus]	Master Protein Candidate	0	FALSE	24.966	14	3	9	3	171	18.5	4.13	29.47	3
74195796	0.015873	0.283682	1.08884	0.122793	Ptma	unnamed protein product, partial [Mus musculus]	Master Protein	0	FALSE	24.966	14	3	9	3	172	18.7	4.13	29.47	3
148680345	0.015873	0.283682	1.08884	0.122793	Gm4617	mCG124913 [Mus musculus]	Master Protein Candidate	0	FALSE	24.966	22	3	9	3	110	12.1	3.8	29.47	3
148708263	0.015873	0.283682	1.08884	0.122793	Ptma	prothymosin alpha, isoform CRA_b [Mus musculus]	Master Protein Candidate	0	FALSE	24.966	24	3	9	3	99	10.9	3.89	29.47	3
148695749	0.031746	0.353216	1.08841	0.122228	Cat	catalase, isoform CRA_a [Mus musculus]	None	0	FALSE	114.99	78	12	45	12	176	19.7	9.09	150.27	12
1150764	0.015873	0.283682	1.08715	0.120552	Acadvl	very-long chain acyl-CoA dehydrogenase, partial [Mus musculus]	None	0	FALSE	16.132	13	4	7	4	318	34.8	9.14	24.51	4
220474	0.0357143	0.395584	1.08696	0.120294	Lmna	lamin A, partial [Mus musculus]	None	0	FALSE	55.656	26	9	17	8	431	47.5	7.06	51.8	9
148680100	0.00793651	0.283682	1.08669	0.119937	Ccbl2; Kyat3	cysteine conjugate-beta lyase 2, isoform CRA_c [Mus musculus]	None	0	FALSE	24.585	33	6	12	5	187	21.3	8.4	34.74	6
74223714	0.0238095	0.353216	1.0853	0.118098	Cat	unnamed protein product [Mus musculus]	None	0	FALSE	307.483	67	31	121	31	526	59.7	7.88	418.91	31
18381077	0.031746	0.353216	1.08487	0.117518	Uroc1	Urocanase domain containing 1 [Mus musculus]	None	0	FALSE	105.473	35	17	40	17	676	74.5	7.53	119.93	17
148666867	0.031746	0.353216	1.08487	0.117518	Uroc1	urocanase domain containing 1 [Mus musculus]	None	0	FALSE	105.473	35	17	40	17	676	74.5	7.4	119.93	17
6840853	0.031746	0.353216	1.08467	0.117254	Gpi1	structural glucose phosphate isomerase 1, partial [Mus musculus]	None	0	FALSE	15.241	35	4	10	4	127	14.2	7.62	31.14	4
568941803	0.015873	0.283682	1.08442	0.116926	Uroc1	PREDICTED: urocanate hydratase isoform X2 [Mus musculus]	None	0	FALSE	86.016	36	14	30	14	569	62.3	7.09	93.43	14
398048	0.031746	0.353216	1.0844	0.116899	Rpl12	ribosomal protein L12 [Mus musculus]	None	0	FALSE	36.633	44	6	17	6	165	17.8	9.42	48.92	6
29612561	0.00793651	0.283682	1.08425	0.116691	Hsp90ab1	Hsp90ab1 protein, partial [Mus musculus]	None	0	FALSE	136.352	69	19	47	2	363	41.7	5.07	169.94	19
26344712	0.015873	0.283682	1.08419	0.116616	Cat	unnamed protein product [Mus musculus]	Master Protein	0	FALSE	320.323	71	32	126	32	527	59.8	7.9	442.62	32
74192673	0.015873	0.283682	1.08419	0.116616	Cat	unnamed protein product [Mus musculus]	Master Protein Candidate	0	FALSE	320.323	71	32	126	32	527	59.8	7.88	442.62	32
50595	0.031746	0.353216	1.08419	0.116616	Cat	unnamed protein product [Mus musculus]	None	0	FALSE	299.339	68	30	120	30	527	59.7	7.88	420.89	30
442441	0.031746	0.353216	1.08419	0.116616	Cat	catalase [Mus musculus]	None	0	FALSE	299.339	68	30	120	30	527	59.7	8.07	420.89	30
74204830	0.031746	0.353216	1.08419	0.116616	Cat	unnamed protein product [Mus musculus]	None	0	FALSE	299.339	68	30	120	30	527	59.7	7.88	420.89	30
26355485	0.015873	0.283682	1.0841	0.116501	Ppp2cb	unnamed protein product, partial [Mus musculus]	None	0	FALSE	13.344	10	2	4	2	285	32.6	5.63	13.04	2
35193198	0.015873	0.283682	1.0841	0.116501	Ppp2cb	Ppp2cb protein [Mus musculus]	None	0	FALSE	13.344	9	2	4	2	309	35.6	5.43	13.04	2
74228849	0.031746	0.353216	1.0841	0.116501	Cat	unnamed protein product [Mus musculus]	None	0	FALSE	315.304	69	31	122	31	527	59.8	8.07	431.01	31
74146235	0.031746	0.353216	1.08384	0.116158	Uroc1	unnamed protein product [Mus musculus]	Master Protein	0	FALSE	109.734	35	18	41	18	710	78.4	7.27	123.11	18
341940812	0.031746	0.353216	1.08384	0.116158	Uroc1	RecName: Full=Urocanate hydratase; Short=Urocanase; AltName: Full=Imidazolonepropionate hydrolase	Master Protein Candidate	0	FALSE	109.734	37	18	41	18	676	74.5	7.53	123.11	18
74220471	0.015873	0.283682	1.08378	0.116073	Aldh3a2	unnamed protein product [Mus musculus]	None	0	FALSE	35.481	25	9	13	9	484	54	8.35	36.79	9
3097244	0.0396825	0.428629	1.0836	0.115829	Rps14	ribosomal protein S14 [Mus musculus]	Master Protein Candidate	0	FALSE	30.143	38	5	14	5	151	16.3	10.13	48.31	5
148677865	0.0396825	0.428629	1.0836	0.115829	Rps14	mCG6028, isoform CRA_a [Mus musculus]	Master Protein	0	FALSE	30.143	38	5	14	5	151	16.3	10.05	48.31	5
26341802	0.031746	0.353216	1.08174	0.113355	Aldh3a2	unnamed protein product [Mus musculus]	None	0	FALSE	39.378	22	10	15	10	487	54.3	8.48	43.59	10
28277018	0.00793651	0.283682	1.0817	0.1133	Hsp90ab1	Hsp90ab1 protein, partial [Mus musculus]	None	0	FALSE	149.61	72	20	51	2	378	43.5	5.27	186.11	20
687254	0.031746	0.353216	1.08148	0.113009	Aldh3a2	aldehyde deydrogenase [Mus musculus]	Master Protein Candidate	0	FALSE	42.683	28	11	16	11	484	53.9	8.35	46.65	11
12698456	0.031746	0.353216	1.08148	0.113009	Aldh3a2	fatty aldehyde dehydrogenase [Mus musculus]	Master Protein Candidate	0	FALSE	42.683	28	11	16	11	484	53.9	8.35	46.65	11
12698457	0.031746	0.353216	1.08148	0.113009	Aldh3a2	fatty aldehyde dehydrogenase variant form [Mus musculus]	Master Protein Candidate	0	FALSE	42.683	27	11	16	11	507	56.6	9.09	46.65	11
13277828	0.031746	0.353216	1.08148	0.113009	Aldh3a2	Aldehyde dehydrogenase family 3, subfamily A2 [Mus musculus]	Master Protein Candidate	0	FALSE	42.683	28	11	16	11	484	53.9	8.35	46.65	11
26352005	0.031746	0.353216	1.08148	0.113009	Aldh3a2	unnamed protein product [Mus musculus]	Master Protein Candidate	0	FALSE	42.683	28	11	16	11	484	54	8.35	46.65	11
568971248	0.031746	0.353216	1.08148	0.113009	Aldh3a2	PREDICTED: fatty aldehyde dehydrogenase isoform X2 [Mus musculus]	Master Protein Candidate	0	FALSE	42.683	28	11	16	11	487	54.3	8.48	46.65	11
568971250	0.031746	0.353216	1.08148	0.113009	Aldh3a2	PREDICTED: fatty aldehyde dehydrogenase isoform X3 [Mus musculus]	Master Protein Candidate	0	FALSE	42.683	28	11	16	11	482	53.7	8.48	46.65	11
1062594028	0.031746	0.353216	1.08148	0.113009		fatty aldehyde dehydrogenase isoform 1 [Mus musculus]	Master Protein	0	FALSE	42.683	27	11	16	11	507	56.6	9.09	46.65	11
1062593943	0.031746	0.353216	1.08034	0.111483		fatty aldehyde dehydrogenase isoform 3 [Mus musculus]	None	0	FALSE	38.75	28	10	14	10	437	48.4	8.88	43.89	10
12832275	0.00793651	0.283682	1.07775	0.108028	Msra	unnamed protein product [Mus musculus]	None	0	FALSE	36.066	37	7	13	7	233	25.9	8.16	38.48	7
26340452	0.00793651	0.283682	1.07775	0.108028	Msra	unnamed protein product [Mus musculus]	Master Protein	0	FALSE	38.67	42	8	15	8	233	26	8.41	43.32	8
371927257	0.00793651	0.283682	1.07775	0.108028		Chain A, Peptide methionine sulfoxide reductase	Master Protein Candidate	0	FALSE	38.67	46	8	15	8	212	23.6	7.2	43.32	8
13542683	0.031746	0.353216	1.07717	0.107242	Uso1	Uso1 protein, partial [Mus musculus]	None	0	FALSE	26.042	24	6	8	6	335	37.7	4.68	24.07	6
26353038	0.031746	0.353216	1.07717	0.107242	Idh2	unnamed protein product [Mus musculus]	Master Protein	0	FALSE	106.004	49	21	47	21	452	50.9	8.69	144.27	21
74214172	0.031746	0.353216	1.07717	0.107242	Uso1	unnamed protein product [Mus musculus]	None	0	FALSE	26.042	22	6	8	6	353	39.8	4.69	24.07	6
298533200	0.031746	0.353216	1.07717	0.107242		unnamed protein product [Mus musculus]	Master Protein Candidate	0	FALSE	106.004	49	21	47	21	452	50.9	8.69	144.27	21
1243912607	0.031746	0.353216	1.07717	0.107242		Chain A, Isocitrate Dehydrogenase [nadp], Mitochondrial	Master Protein Candidate	0	FALSE	106.004	52	21	47	21	422	47.8	7.99	144.27	21
1243912610	0.031746	0.353216	1.07717	0.107242		Chain B, Isocitrate Dehydrogenase [nadp], Mitochondrial	Master Protein Candidate	0	FALSE	106.004	52	21	47	21	422	47.8	8.15	144.27	21
755503338	0.031746	0.353216	1.07556	0.105094	Fmo5	PREDICTED: dimethylaniline monooxygenase [N-oxide-forming] 5 isoform X3 [Mus musculus]	None	0	FALSE	70.468	43	17	35	17	404	45.4	8.44	95.43	17
755519448	0.00793651	0.283682	1.0752	0.104609	Cyp2a22	PREDICTED: cytochrome P450, family 2, subfamily a, polypeptide 22 isoform X2 [Mus musculus]	None	0	FALSE	35.937	26	8	21	7	272	31.8	9.64	52.71	8
554269	0.0238095	0.353216	1.07514	0.104522	Rpl7	ribosomal protein L7, partial [Mus musculus]	None	0	FALSE	27.978	27	6	18	6	244	28.4	10.9	46.74	6
148670365	0.015873	0.283682	1.07343	0.102234	Aldob	aldolase 2, B isoform, isoform CRA_b, partial [Mus musculus]	None	0	FALSE	154.568	76	14	68	13	277	30	7.69	274.52	14
148707473	0.015873	0.283682	1.07178	0.100008		mCG20133, isoform CRA_a, partial [Mus musculus]	None	0	FALSE	70.045	38	8	30	8	269	30.3	7.21	124.27	8
148707474	0.015873	0.283682	1.07178	0.100008		mCG20133, isoform CRA_b [Mus musculus]	None	0	FALSE	70.045	40	8	30	8	253	28.3	6.61	124.27	8
1589591	0.031746	0.353216	1.07143	0.0995357		isocitrate dehydrogenase	None	0	FALSE	85.508	32	17	39	17	523	58.7	8.57	117.76	17
298533226	0.031746	0.353216	1.07143	0.0995357		unnamed protein product [Mus musculus]	None	0	FALSE	85.508	32	17	39	17	523	58.7	8.65	117.76	17
3123646	0.047619	0.450719	1.07089	0.0988123	Atp5l	F1F0-ATP synthase g subunit [Mus musculus]	Master Protein Candidate	0	FALSE	11.361	27	2	9	2	103	11.4	9.74	32.63	2
12841973	0.047619	0.450719	1.07089	0.0988123	Atp5l	unnamed protein product [Mus musculus]	Master Protein	0	FALSE	11.361	22	2	9	2	129	14.2	8.63	32.63	2
12848221	0.047619	0.450719	1.07089	0.0988123	Atp5l	unnamed protein product [Mus musculus]	Master Protein Candidate	0	FALSE	11.361	27	2	9	2	103	11.4	9.66	32.63	2
12859516	0.047619	0.450719	1.07089	0.0988123	Atp5l	unnamed protein product [Mus musculus]	Master Protein Candidate	0	FALSE	11.361	27	2	9	2	103	11.4	9.74	32.63	2
148693677	0.047619	0.450719	1.07089	0.0988123		mCG1549, isoform CRA_b, partial [Mus musculus]	Master Protein Candidate	0	FALSE	11.361	27	2	9	2	104	11.5	9.74	32.63	2
309268	0.031746	0.353216	1.06974	0.0972619	Gpi1	glucose phosphate isomerase, partial [Mus musculus]	None	0	FALSE	20.894	21	5	12	5	290	32.7	7.24	39.73	5
13435603	0.031746	0.353216	1.06728	0.0939364	Hnrnpr	Hnrpr protein, partial [Mus musculus]	None	0	FALSE	11.361	5	3	6	3	601	67.1	8.9	14.56	3
15986735	0.031746	0.353216	1.06728	0.0939364	Syncrip	RRM RNA binding protein NSAP1, partial [Mus musculus]	Master Protein Candidate	0	FALSE	21.67	10	5	8	5	558	62.6	9.23	20.33	5
26330244	0.031746	0.353216	1.06728	0.0939364	Syncrip	unnamed protein product [Mus musculus]	Master Protein Candidate	0	FALSE	21.67	10	5	8	5	562	62.6	7.56	20.33	5
26347007	0.031746	0.353216	1.06728	0.0939364	Syncrip	unnamed protein product, partial [Mus musculus]	None	0	FALSE	16.508	9	4	7	4	491	54.9	9.1	17.97	4
33416526	0.031746	0.353216	1.06728	0.0939364	Syncrip	Syncrip protein, partial [Mus musculus]	Master Protein	0	FALSE	21.67	9	5	8	5	667	74.7	9.03	20.33	5
37589144	0.031746	0.353216	1.06728	0.0939364	Syncrip	Syncrip protein, partial [Mus musculus]	Master Protein Candidate	0	FALSE	21.67	9	5	8	5	635	71.1	8.92	20.33	5
74141454	0.031746	0.353216	1.06728	0.0939364	Hnrnpr	unnamed protein product, partial [Mus musculus]	None	0	FALSE	11.361	8	3	6	3	381	42.6	6.04	14.56	3
74194838	0.031746	0.353216	1.06728	0.0939364	Hnrnpr	unnamed protein product [Mus musculus]	None	0	FALSE	11.361	5	3	6	3	632	70.9	8.13	14.56	3
74207436	0.031746	0.353216	1.06728	0.0939364	Hnrnpr	unnamed protein product [Mus musculus]	None	0	FALSE	11.361	5	3	6	3	632	70.8	8.13	14.56	3
74219109	0.031746	0.353216	1.06728	0.0939364	Hnrnpr	unnamed protein product, partial [Mus musculus]	None	0	FALSE	11.361	5	3	6	3	610	68.4	9.06	14.56	3
74228775	0.031746	0.353216	1.06728	0.0939364	Hnrnpr	unnamed protein product, partial [Mus musculus]	None	0	FALSE	11.361	5	3	6	3	604	67.6	8.9	14.56	3
127799069	0.031746	0.353216	1.06728	0.0939364	Syncrip	Synaptotagmin binding, cytoplasmic RNA interacting protein [Mus musculus]	Master Protein Candidate	0	FALSE	21.67	10	5	8	5	562	62.6	7.56	20.33	5
127801712	0.031746	0.353216	1.06728	0.0939364	Syncrip	Syncrip protein [Mus musculus]	Master Protein Candidate	0	FALSE	21.67	10	5	8	5	561	62.5	7.56	20.33	5
148694588	0.031746	0.353216	1.06728	0.0939364		mCG16769, isoform CRA_b [Mus musculus]	Master Protein Candidate	0	FALSE	21.67	19	5	8	5	299	33	7.09	20.33	5
148694589	0.031746	0.353216	1.06728	0.0939364	Syncrip	mCG16769, isoform CRA_a [Mus musculus]	Master Protein Candidate	0	FALSE	21.67	9	5	8	5	623	69.6	8.59	20.33	5
148694590	0.031746	0.353216	1.06728	0.0939364		mCG16769, isoform CRA_c, partial [Mus musculus]	Master Protein Candidate	0	FALSE	21.67	9	5	8	5	612	68.5	8.78	20.33	5
459683864	0.031746	0.353216	1.06728	0.0939364	Hnrnpr	heterogeneous nuclear ribonucleoprotein R isoform a [Mus musculus]	None	0	FALSE	11.361	5	3	6	3	632	70.8	8.13	14.56	3
568931992	0.031746	0.353216	1.06728	0.0939364	Hnrnpr	PREDICTED: heterogeneous nuclear ribonucleoprotein R isoform X1 [Mus musculus]	None	0	FALSE	11.361	5	3	6	3	635	71.1	8.13	14.56	3
568961743	0.031746	0.353216	1.06728	0.0939364	Syncrip	PREDICTED: heterogeneous nuclear ribonucleoprotein Q isoform X1 [Mus musculus]	Master Protein Candidate	0	FALSE	21.67	9	5	8	5	605	67.4	9.06	20.33	5
202225	0.015873	0.283682	1.06723	0.0938669	Tuba1b	alpha-tubulin, partial [Mus musculus]	None	0	FALSE	104.396	46	13	39	3	352	39.3	5.15	134.45	13
12850141	0.015873	0.283682	1.06723	0.0938669	Tuba1c	unnamed protein product, partial [Mus musculus]	None	0	FALSE	104.396	47	13	39	3	344	38.3	5.15	134.45	13
4836511	0.031746	0.353216	1.06531	0.0912681	Ndufa2	NADH-ubiquinone oxidoreductase B8 subunit [Mus musculus]	Master Protein Candidate	0	FALSE	14.801	30	3	5	3	99	10.9	9.99	15.55	3
1397983672	0.031746	0.353216	1.06531	0.0912681		Chain S, NADH dehydrogenase [ubiquinone] 1 alpha subcomplex subunit 2	Master Protein	0	FALSE	14.801	30	3	5	3	99	10.9	9.99	15.55	3
12839396	0.031746	0.353216	1.06455	0.0902441		unnamed protein product [Mus musculus]	None	0	FALSE	85.428	29	8	25	2	395	44	6.07	98.69	8
148675792	0.047619	0.450719	1.06413	0.089672		mCG50233, isoform CRA_a, partial [Mus musculus]	None	0	FALSE	33.946	33	7	14	7	214	25	5.82	37.04	7
148675793	0.047619	0.450719	1.06413	0.089672		mCG50233, isoform CRA_b, partial [Mus musculus]	None	0	FALSE	29.027	33	6	13	6	174	20.1	5.85	32.96	6
459683866	0.031746	0.353216	1.06392	0.0893863	Hnrnpr	heterogeneous nuclear ribonucleoprotein R isoform b [Mus musculus]	None	0	FALSE	7.381	4	2	4	2	531	59.6	9.16	9.42	2
568932002	0.031746	0.353216	1.06392	0.0893863	Hnrnpr	PREDICTED: heterogeneous nuclear ribonucleoprotein R isoform X3 [Mus musculus]	None	0	FALSE	7.381	4	2	4	2	534	59.9	9.16	9.42	2
568961745	0.031746	0.353216	1.06392	0.0893863	Syncrip	PREDICTED: heterogeneous nuclear ribonucleoprotein Q isoform X2 [Mus musculus]	None	0	FALSE	12.529	6	3	5	3	525	59	9.36	12.83	3
902763357	0.031746	0.353216	1.06392	0.0893863	Syncrip	heterogeneous nuclear ribonucleoprotein Q isoform 4 [Mus musculus]	None	0	FALSE	12.529	7	3	5	3	464	52	9.16	12.83	3
44890285	0.031746	0.353216	1.06225	0.0871274	Ldha	Ldha protein [Mus musculus]	None	0	FALSE	66.986	81	8	28	8	104	11.2	5.45	101.21	8
74191270	0.015873	0.283682	1.06211	0.0869356	Ctsd	unnamed protein product [Mus musculus]	None	0	FALSE	44.659	25	9	20	9	410	44.9	7.15	61.19	9
148684319	0.031746	0.353216	1.06196	0.0867233		mCG21672 [Mus musculus]	None	0	FALSE	89.545	29	11	45	11	296	32.8	9.5	150.89	11
148670367	0.031746	0.353216	1.06129	0.0858194	Aldob	aldolase 2, B isoform, isoform CRA_d, partial [Mus musculus]	None	0	FALSE	83.264	53	10	55	10	173	19.1	8.78	164.88	10
1397983949	0.047619	0.450719	1.05995	0.0840027		Chain n, NADH dehydrogenase [ubiquinone] 1 beta subcomplex subunit 9	Master Protein	0	FALSE	6.992	16	2	3	2	179	22	7.8	9.3	2
1423310306	0.047619	0.450719	1.05995	0.0840027		NADH dehydrogenase [ubiquinone] 1 beta subcomplex subunit 9 isoform 2 [Mus musculus]	Master Protein Candidate	0	FALSE	6.992	21	2	3	2	136	16.7	5.62	9.3	2
6688685	0.031746	0.353216	1.05986	0.0838676	Hacl1	2-hydroxyphytanoyl-CoA lyase [Mus musculus]	None	0	FALSE	92.13	32	15	33	15	581	63.6	6.27	95.11	15
12838108	0.0238095	0.353216	1.05858	0.0821326	Hacl1	unnamed protein product [Mus musculus]	Master Protein Candidate	0	FALSE	95.577	35	16	34	16	581	63.6	6.27	98.38	16
148692868	0.0238095	0.353216	1.05858	0.0821326	Hacl1	2-hydroxyacyl-CoA lyase 1, partial [Mus musculus]	Master Protein	0	FALSE	95.577	34	16	34	16	587	64.4	6.54	98.38	16
26361821	0.031746	0.353216	1.05729	0.0803734	Arpc2	unnamed protein product, partial [Mus musculus]	None	0	FALSE	6.054	13	2	2	2	191	22.2	7.64	3.76	2
71051070	0.031746	0.353216	1.05729	0.0803734	Arpc2	Arpc2 protein, partial [Mus musculus]	None	0	FALSE	7.379	11	3	4	3	276	31.6	8	3.76	3
74195800	0.031746	0.353216	1.05729	0.0803734	Arpc2	unnamed protein product, partial [Mus musculus]	Master Protein	0	FALSE	11.617	10	4	5	4	383	42.5	9.06	6.91	4
92110223	0.031746	0.353216	1.05729	0.0803734	Arpc2	Actin related protein 2/3 complex, subunit 2 [Mus musculus]	Master Protein Candidate	0	FALSE	11.617	13	4	5	4	300	34.3	7.36	6.91	4
148667893	0.031746	0.353216	1.05729	0.0803734		mCG114810, isoform CRA_b [Mus musculus]	None	0	FALSE	7.379	11	3	4	3	284	32.5	8.02	3.76	3
198578	0.015873	0.283682	1.05502	0.0772651	Rps18	ribosomal protein [Mus musculus]	Master Protein Candidate	0	FALSE	18.413	29	5	12	5	152	17.7	11.12	36.06	5
4050105	0.015873	0.283682	1.05502	0.0772651	Rps18	RPS18 [Mus musculus]	Master Protein Candidate	0	FALSE	18.413	29	5	12	5	152	17.7	10.99	36.06	5
74197062	0.015873	0.283682	1.05502	0.0772651	Rps18	unnamed protein product [Mus musculus]	Master Protein Candidate	0	FALSE	18.413	29	5	12	5	152	17.7	11.09	36.06	5
148668546	0.015873	0.283682	1.05502	0.0772651	Gm10260	mCG114988 [Mus musculus]	Master Protein	0	FALSE	18.413	29	5	12	5	152	17.7	10.86	36.06	5
148678284	0.015873	0.283682	1.05502	0.0772651		mCG23000, isoform CRA_a [Mus musculus]	Master Protein Candidate	0	FALSE	18.413	43	5	12	5	103	12.1	9.99	36.06	5
148700464	0.015873	0.283682	1.05502	0.0772651	Gm11361	mCG116671 [Mus musculus]	Master Protein Candidate	0	FALSE	18.413	29	5	12	5	152	17.7	10.86	36.06	5
148680575	0.015873	0.283682	1.04472	0.06311	Acadvl	acyl-Coenzyme A dehydrogenase, very long chain, isoform CRA_b [Mus musculus]	None	0	FALSE	71.039	33	11	26	11	418	45.8	9.04	94.43	11
74183518	0.015873	0.283682	1.0447	0.0630867	Glud1	unnamed protein product, partial [Mus musculus]	None	0	FALSE	180.247	68	16	76	16	326	35.8	7.34	268.14	16
74211311	0.031746	0.353216	1.04447	0.0627675	Tuba1a	unnamed protein product [Mus musculus]	None	0	FALSE	125.431	43	15	46	4	451	50	5.06	175.43	15
4102182	0.015873	0.283682	1.04418	0.0623659	Pck1	phosphoenolpyruvate carboxykinase [Mus musculus]	Master Protein Candidate	0	FALSE	160.983	56	26	68	26	622	69.3	6.6	216.06	26
22902450	0.015873	0.283682	1.04418	0.0623659	Pck1	Phosphoenolpyruvate carboxykinase 1, cytosolic [Mus musculus]	Master Protein	0	FALSE	160.983	56	26	68	26	622	69.3	6.6	216.06	26
74177661	0.031746	0.353216	1.04184	0.0591292	Hnrnpm	unnamed protein product [Mus musculus]	None	0	FALSE	22.094	11	6	7	6	679	72	8.12	15.48	6
6680027	0.0238095	0.353216	1.04167	0.0588937	Glud1	glutamate dehydrogenase 1, mitochondrial precursor [Mus musculus]	Master Protein	0	FALSE	278.05	60	27	126	27	558	61.3	8	427.71	27
148692928	0.0238095	0.353216	1.04167	0.0588937	Glud1	glutamate dehydrogenase 1 [Mus musculus]	Master Protein Candidate	0	FALSE	278.05	68	27	126	27	490	54.2	7.8	427.71	27
26326319	0.015873	0.283682	1.04112	0.058141	Pck1	unnamed protein product [Mus musculus]	None	0	FALSE	158.723	55	25	66	25	622	69.3	6.65	211.12	25
148679283	0.015873	0.283682	1.04098	0.0579473		mCG141694 [Mus musculus]	None	0	FALSE	29.773	16	4	11	4	408	46.1	5.83	38.7	4
74217226	0.031746	0.353216	1.03992	0.0564699	Anxa6	unnamed protein product [Mus musculus]	None	0	FALSE	109.209	46	20	41	19	556	62.3	5.36	135.97	20
148674685	0.031746	0.353216	1.03783	0.0535665	Pck1	phosphoenolpyruvate carboxykinase 1, cytosolic, isoform CRA_c [Mus musculus]	None	0	FALSE	127.778	57	21	56	21	505	56.5	6.07	174.13	21
873090820	0.047619	0.450719	1.03742	0.0530029	Copb2	Chain D, Coatomer Subunit Beta'	Master Protein	0	FALSE	35.397	10	8	12	8	905	102.4	5.3	29.93	8
4760598	0.0396825	0.428629	1.03719	0.0526803	Ak2	adenylate kinase isozyme 2 [Mus musculus]	None	0	FALSE	57.039	35	6	23	6	232	25.8	7.3	88.54	6
33317937	0.047619	0.450719	1.03669	0.0519813	Hsp90ab1	heat shock protein 84b [Mus musculus]	Master Protein	0	FALSE	251.131	56	34	101	4	724	83.2	5.03	349.59	34
74147026	0.031746	0.353216	1.03665	0.0519278	Hsp90ab1	unnamed protein product [Mus musculus]	None	0	FALSE	234.433	50	32	96	4	724	83.2	5.06	329.48	32
74205095	0.015873	0.283682	1.03452	0.0489584	Rps4y2; Rps4l	unnamed protein product [Mus musculus]	None	0	FALSE	52.817	36	11	29	11	262	29.2	10.27	71.19	11
26354278	0.031746	0.353216	1.0299	0.0424999	Glud1	unnamed protein product [Mus musculus]	None	0	FALSE	261.761	57	26	120	26	558	61.2	8.18	402.43	26
74185113	0.031746	0.353216	1.02188	0.0312187	Ak2	unnamed protein product [Mus musculus]	Master Protein Candidate	0	FALSE	102.063	62	10	36	10	232	25.6	7.42	135.44	10
77020262	0.031746	0.353216	1.02188	0.0312187	Ak2	adenylate kinase 2, mitochondrial isoform a [Mus musculus]	Master Protein	0	FALSE	102.063	60	10	36	10	239	26.5	7.39	135.44	10
227293	0.031746	0.353216	1.01434	0.0205474		cathepsin B	None	0	FALSE	45.424	24	6	15	6	339	37.4	6.21	53.91	6
309202	0.031746	0.353216	1.01434	0.0205474	Ctsb	mouse preprocathepsin B [Mus musculus]	Master Protein Candidate	0	FALSE	46.705	27	7	16	7	339	37.3	5.76	56.2	7
74213457	0.031746	0.353216	1.01434	0.0205474	Ctsb	unnamed protein product [Mus musculus]	Master Protein Candidate	0	FALSE	46.705	27	7	16	7	339	37.3	6.02	56.2	7
148704123	0.031746	0.353216	1.01434	0.0205474	Ctsb	cathepsin B, isoform CRA_a [Mus musculus]	Master Protein	0	FALSE	46.705	27	7	16	7	339	37.3	5.91	56.2	7
26350783	0.015873	0.283682	0.977956	-0.0321587	Vcp	unnamed protein product [Mus musculus]	None	0	FALSE	216.016	60	31	73	31	723	80.1	5.24	235.78	31
49728	0.047619	0.450719	0.97495	-0.0366	Pdia4	unnamed protein product [Mus musculus]	None	0	FALSE	202.599	52	28	103	28	584	65.7	5.26	368.11	28
148701846	0.031746	0.353216	0.971055	-0.042375		mCG19408 [Mus musculus]	None	0	FALSE	32.155	13	7	10	4	615	69.3	8.69	25.31	7
187956944	0.015873	0.283682	0.968803	-0.0457252	Isoc2a	Isoc2a protein [Mus musculus]	None	0	FALSE	41.829	50	6	22	6	206	22.4	8.02	80.98	6
1424027973	0.00793651	0.283682	0.967871	-0.0471126		glycine N-methyltransferase isoform 2 [Mus musculus]	None	0	FALSE	115.029	65	10	47	10	257	28.6	7.39	191.76	10
26353084	0.015873	0.283682	0.967294	-0.0479731	Hsp90b1	unnamed protein product, partial [Mus musculus]	None	0	FALSE	126.271	73	13	63	12	277	31.5	4.77	223.23	13
148699321	0.015873	0.283682	0.967199	-0.0481149	Isoc2a	mCG20913 [Mus musculus]	Master Protein	0	FALSE	60.103	62	8	26	8	206	22.4	8.02	95.13	8
66267550	0.031746	0.353216	0.966303	-0.0494521	Eprs	Eprs protein, partial [Mus musculus]	Master Protein Candidate	0	FALSE	53.542	13	15	21	15	1477	166.4	7.91	47.61	15
82617575	0.031746	0.353216	0.966303	-0.0494521	Eprs	bifunctional glutamate/proline--tRNA ligase isoform 1 [Mus musculus]	Master Protein Candidate	0	FALSE	53.542	13	15	21	15	1512	170	7.66	47.61	15
1273022158	0.031746	0.353216	0.966303	-0.0494521		bifunctional glutamate/proline--tRNA ligase isoform 2 [Mus musculus]	Master Protein	0	FALSE	53.542	13	15	21	15	1519	170.8	7.84	47.61	15
56971148	0.015873	0.283682	0.964859	-0.0516093	Gnmt	Glycine N-methyltransferase [Mus musculus]	None	0	FALSE	117.108	58	10	50	10	293	32.6	7.47	199.53	10
74220322	0.015873	0.283682	0.96484	-0.0516388	Immt	unnamed protein product [Mus musculus]	None	0	FALSE	63.723	21	16	29	16	741	82.5	6.79	81.64	16
26327721	0.031746	0.353216	0.964767	-0.0517478	Hsp90b1	unnamed protein product, partial [Mus musculus]	None	0	FALSE	308.341	61	31	164	31	615	71.4	4.84	541.06	31
74144350	0.031746	0.353216	0.964767	-0.0517478	Hsp90b1	unnamed protein product [Mus musculus]	None	0	FALSE	309.575	66	32	165	32	612	70.9	5.38	541.06	32
309220	0.0238095	0.353216	0.963228	-0.0540511	Hsp90b1	endoplasmic reticulum transmembrane protein precursor [Mus musculus]	Master Protein Candidate	0	FALSE	402.511	63	42	214	41	802	92.4	4.82	719.12	42
14714615	0.0238095	0.353216	0.963228	-0.0540511	Hsp90b1	Heat shock protein 90, beta (Grp94), member 1 [Mus musculus]	Master Protein Candidate	0	FALSE	402.511	63	42	214	41	802	92.4	4.82	719.12	42
74178174	0.0238095	0.353216	0.963228	-0.0540511	Hsp90b1	unnamed protein product [Mus musculus]	Master Protein	0	FALSE	402.715	63	42	215	41	802	92.4	4.82	721.42	42
26339872	0.031746	0.353216	0.962887	-0.0545622	Immt	unnamed protein product [Mus musculus]	None	0	FALSE	79.013	25	19	32	19	746	82.9	6.61	92.46	19
29427692	0.031746	0.353216	0.962887	-0.0545622	Immt	RecName: Full=MICOS complex subunit Mic60; AltName: Full=Mitochondrial inner membrane protein; AltName: Full=Mitofilin; Flags: Precursor	None	0	FALSE	79.013	25	19	32	19	757	83.8	6.61	92.46	19
74204822	0.031746	0.353216	0.962887	-0.0545622	Immt	unnamed protein product [Mus musculus]	None	0	FALSE	75.518	24	18	31	18	741	82.4	6.7	89.79	18
148666539	0.031746	0.353216	0.962887	-0.0545622	Immt	inner membrane protein, mitochondrial, isoform CRA_b [Mus musculus]	None	0	FALSE	75.518	23	18	31	18	774	86.2	7.42	89.79	18
358439528	0.031746	0.353216	0.962887	-0.0545622	Immt	MICOS complex subunit Mic60 isoform 3 [Mus musculus]	None	0	FALSE	75.518	24	18	31	18	741	82.4	6.7	89.79	18
1039776036	0.031746	0.353216	0.962887	-0.0545622	Immt	PREDICTED: MICOS complex subunit Mic60 isoform X1 [Mus musculus]	None	0	FALSE	75.518	24	18	31	18	752	83.4	6.7	89.79	18
1375023059	0.031746	0.353216	0.962887	-0.0545622		MICOS complex subunit Mic60 isoform 8 [Mus musculus]	None	0	FALSE	79.013	25	19	32	19	745	82.8	6.61	92.46	19
148700275	0.031746	0.353216	0.962598	-0.054994	Gdi2	guanosine diphosphate (GDP) dissociation inhibitor 2, isoform CRA_a, partial [Mus musculus]	None	0	FALSE	54.608	35	8	18	8	351	39.3	9.06	61.69	8
13385310	0.015873	0.283682	0.960952	-0.0574632	Pccb	propionyl-CoA carboxylase beta chain, mitochondrial isoform 1 precursor [Mus musculus]	Master Protein	0	FALSE	65.008	35	13	24	13	541	58.4	7.66	67.84	13
13507244	0.015873	0.283682	0.960952	-0.0574632	Pccb	propionyl-CoA carboxylase beta chain [Mus musculus]	Master Protein Candidate	0	FALSE	65.008	35	13	24	13	541	58.4	7.47	67.84	13
23274260	0.015873	0.283682	0.960952	-0.0574632	Pccb	Propionyl Coenzyme A carboxylase, beta polypeptide [Mus musculus]	None	0	FALSE	59.445	31	12	22	12	541	58.3	7.66	61.72	12
118600805	0.015873	0.283682	0.960952	-0.0574632	Pccb	Pccb protein, partial [Mus musculus]	None	0	FALSE	59.445	31	12	22	12	539	58.1	7.66	61.72	12
148689088	0.015873	0.283682	0.960952	-0.0574632	Pccb	propionyl Coenzyme A carboxylase, beta polypeptide, isoform CRA_a [Mus musculus]	None	0	FALSE	59.445	31	12	22	12	541	58.3	7.66	61.72	12
4678582	0.031746	0.353216	0.960606	-0.0579832	Atp2a2	SERCA2b isoform, partial [Mus musculus]	None	0	FALSE	36.694	17	9	17	9	571	63.1	5.83	45.66	9
12642664	0.0238095	0.353216	0.95809	-0.0617674	Gnmt	glycine N-methyltransferase [Mus musculus]	Master Protein	0	FALSE	150.125	68	12	65	12	293	32.7	7.44	254.45	12
15679953	0.0238095	0.353216	0.95809	-0.0617674	Gnmt	Glycine N-methyltransferase [Mus musculus]	Master Protein Candidate	0	FALSE	150.125	68	12	65	12	293	32.7	7.2	254.45	12
55669638	0.0238095	0.353216	0.95809	-0.0617674		Chain C, Glycine N-methyltransferase	Master Protein Candidate	0	FALSE	150.125	68	12	65	12	292	32.5	7.44	254.45	12
148676266	0.015873	0.283682	0.95776	-0.0622634		mCG20287 [Mus musculus]	None	0	FALSE	135.412	73	16	50	3	354	39.3	5.31	179.94	16
939977622	0.031746	0.353216	0.956436	-0.0642602	Mdh1	malate dehydrogenase, peroxisomal isoform Mdh1x [Mus musculus]	None	0	FALSE	121.42	38	14	58	14	355	39	6.93	195.24	14
74144071	0.015873	0.283682	0.955238	-0.0660677	Pccb	unnamed protein product [Mus musculus]	None	0	FALSE	60.827	34	12	22	12	505	55	8.16	61.45	12
902967410	0.015873	0.283682	0.955238	-0.0660677	Pccb	propionyl-CoA carboxylase beta chain, mitochondrial isoform 2 precursor [Mus musculus]	None	0	FALSE	60.827	35	12	22	12	504	54.6	7.49	61.45	12
82568928	0.031746	0.353216	0.954825	-0.0666911	Immt	Immt protein, partial [Mus musculus]	None	0	FALSE	57.792	33	14	24	14	440	50.1	6.04	70.22	14
74198706	0.047619	0.450719	0.95441	-0.0673185	P4hb	unnamed protein product [Mus musculus]	None	0	FALSE	305.208	67	32	190	23	509	57	4.86	692.17	32
14250361	0.031746	0.353216	0.953097	-0.0693045	Sars	Sars protein [Mus musculus]	Master Protein Candidate	0	FALSE	25.162	16	6	11	6	512	58.4	6.3	25.37	6
33468931	0.031746	0.353216	0.953097	-0.0693045	Sars	serine--tRNA ligase, cytoplasmic isoform 1 [Mus musculus]	Master Protein	0	FALSE	25.162	15	6	11	6	536	61.1	7.43	25.37	6
74139849	0.031746	0.353216	0.953097	-0.0693045	Sars	unnamed protein product [Mus musculus]	Master Protein Candidate	0	FALSE	25.162	16	6	11	6	512	58.3	6.3	25.37	6
74212487	0.031746	0.353216	0.953097	-0.0693045	Sars	unnamed protein product [Mus musculus]	Master Protein Candidate	0	FALSE	25.162	16	6	11	6	511	58.2	6.3	25.37	6
148670021	0.031746	0.353216	0.953097	-0.0693045	Sars	seryl-aminoacyl-tRNA synthetase, isoform CRA_a, partial [Mus musculus]	Master Protein Candidate	0	FALSE	25.162	16	6	11	6	515	58.7	6.57	25.37	6
74190076	0.031746	0.353216	0.952522	-0.0701753	P4hb	unnamed protein product [Mus musculus]	None	0	FALSE	320.282	69	32	195	23	509	57	4.88	723.45	32
26355849	0.015873	0.283682	0.952144	-0.070749	Tubb4b	unnamed protein product, partial [Mus musculus]	None	0	FALSE	102.325	70	13	43	2	291	32.2	5.85	152.67	13
54777	0.031746	0.353216	0.951485	-0.071747	P4hb	unnamed protein product [Mus musculus]	Master Protein Candidate	0	FALSE	325.07	71	33	200	24	509	57.1	4.91	737.73	33
42415475	0.031746	0.353216	0.951485	-0.071747	P4hb	protein disulfide-isomerase precursor [Mus musculus]	Master Protein Candidate	0	FALSE	325.07	71	33	200	24	509	57	4.88	737.73	33
74141920	0.031746	0.353216	0.951485	-0.071747	P4hb	unnamed protein product [Mus musculus]	Master Protein Candidate	0	FALSE	325.07	71	33	200	24	509	57.1	4.88	737.73	33
74198312	0.031746	0.353216	0.951485	-0.071747	P4hb	unnamed protein product [Mus musculus]	Master Protein Candidate	0	FALSE	325.07	71	33	200	24	509	57.1	4.88	737.73	33
74211686	0.031746	0.353216	0.951485	-0.071747	P4hb	unnamed protein product, partial [Mus musculus]	Master Protein Candidate	0	FALSE	325.07	71	33	200	24	505	56.6	4.89	737.73	33
74212231	0.031746	0.353216	0.951485	-0.071747	P4hb	unnamed protein product [Mus musculus]	Master Protein Candidate	0	FALSE	325.07	71	33	200	24	509	57.1	4.88	737.73	33
148702818	0.031746	0.353216	0.951485	-0.071747	P4hb	prolyl 4-hydroxylase, beta polypeptide, isoform CRA_a [Mus musculus]	Master Protein Candidate	0	FALSE	325.07	68	33	200	24	528	59	4.88	737.73	33
148702819	0.031746	0.353216	0.951485	-0.071747	P4hb	prolyl 4-hydroxylase, beta polypeptide, isoform CRA_b, partial [Mus musculus]	Master Protein	0	FALSE	325.07	65	33	200	24	552	61.5	5.07	737.73	33
74220649	0.031746	0.353216	0.951389	-0.0718929	P4hb	unnamed protein product [Mus musculus]	None	0	FALSE	282.069	65	32	183	23	509	57.1	4.88	644.95	32
17017241	0.0396825	0.428629	0.950642	-0.0730265	Cald1	h-caldesmon, partial [Mus musculus]	None	0	FALSE	14.699	8	2	4	2	321	37.2	5.25	10.65	2
19353110	0.00793651	0.283682	0.950533	-0.0731907	Rpl10; Rpl10-ps1	Ribosomal protein 10 [Mus musculus]	Master Protein	0	FALSE	33.555	37	7	12	7	214	24.6	10.08	34.78	7
56541260+G265G265A265:H266A265:H265AA265:K266	0.00793651	0.283682	0.950533	-0.0731907	Rpl10	Ribosomal protein 10 [Mus musculus]	None	0	FALSE	31.917	34	6	11	6	214	24.5	10.14	32.95	6
74212071	0.00793651	0.283682	0.950533	-0.0731907	Rpl10	unnamed protein product [Mus musculus]	Master Protein Candidate	0	FALSE	33.555	37	7	12	7	214	24.6	10.01	34.78	7
123228993	0.00793651	0.283682	0.950533	-0.0731907	Rpl10	ribosomal protein 10, partial [Mus musculus]	Master Protein Candidate	0	FALSE	33.555	40	7	12	7	201	23.1	10.01	34.78	7
2612797	0.015873	0.283682	0.949102	-0.0753653	Nucb2	precursor NEFA protein [Mus musculus]	Master Protein Candidate	0	FALSE	40.384	22	8	16	8	420	50.2	5.15	45.69	8
74219263	0.015873	0.283682	0.949102	-0.0753653	Nucb2	unnamed protein product [Mus musculus]	Master Protein Candidate	0	FALSE	40.384	22	8	16	8	420	50.3	5.15	45.69	8
148685163	0.015873	0.283682	0.949102	-0.0753653	Nucb2	nucleobindin 2, isoform CRA_c [Mus musculus]	None	0	FALSE	30.516	18	7	14	7	411	49.2	5.2	36.56	7
1337931627	0.015873	0.283682	0.949102	-0.0753653		nucleobindin-2 precursor [Mus musculus]	Master Protein	0	FALSE	40.384	22	8	16	8	420	50.3	5.15	45.69	8
21704140	0.031746	0.353216	0.94907	-0.0754143	Hibadh	3-hydroxyisobutyrate dehydrogenase, mitochondrial precursor [Mus musculus]	Master Protein	0	FALSE	41.232	30	5	10	5	335	35.4	8.13	40.55	5
26347027	0.031746	0.353216	0.94907	-0.0754143	Hibadh	unnamed protein product [Mus musculus]	Master Protein Candidate	0	FALSE	41.232	30	5	10	5	335	35.4	8.13	40.55	5
119507488	0.031746	0.353216	0.94907	-0.0754143	Hibadh	3-hydroxyisobutyrate dehydrogenase [Mus musculus]	None	0	FALSE	27.037	17	4	8	4	334	35.5	8.63	32.88	4
755496301	0.015873	0.283682	0.94902	-0.0754902	Eprs	PREDICTED: bifunctional glutamate/proline--tRNA ligase isoform X4 [Mus musculus]	None	0	FALSE	39.648	15	11	16	11	980	109.4	7.59	36.61	11
387129	0.015873	0.283682	0.947835	-0.0772927	Mdh1	cytosolic malate dehydrogenase, partial [Mus musculus]	Master Protein Candidate	0	FALSE	130.788	45	16	67	16	334	36.5	6.58	223.64	16
92087001	0.015873	0.283682	0.947835	-0.0772927	Mdh1	RecName: Full=Malate dehydrogenase, cytoplasmic; AltName: Full=Cytosolic malate dehydrogenase	Master Protein Candidate	0	FALSE	130.788	45	16	67	16	334	36.5	6.58	223.64	16
148675904	0.015873	0.283682	0.947835	-0.0772927	Mdh1	malate dehydrogenase 1, NAD (soluble), isoform CRA_c, partial [Mus musculus]	Master Protein	0	FALSE	130.788	41	16	67	16	366	40	7.33	223.64	16
23270912	0.015873	0.283682	0.947669	-0.077545	Aars	Alanyl-tRNA synthetase [Mus musculus]	Master Protein Candidate	0	FALSE	65.018	25	16	26	16	968	106.8	5.67	68.23	16
26336489	0.015873	0.283682	0.947669	-0.077545	Aars	unnamed protein product [Mus musculus]	Master Protein Candidate	0	FALSE	65.018	25	16	26	16	968	106.9	5.67	68.23	16
37903407	0.015873	0.283682	0.947669	-0.077545	Aars	Alanyl-tRNA synthase [Mus musculus]	Master Protein Candidate	0	FALSE	65.018	25	16	26	16	968	106.9	5.62	68.23	16
74213943	0.015873	0.283682	0.947669	-0.077545	Aars	unnamed protein product [Mus musculus]	Master Protein Candidate	0	FALSE	65.018	25	16	26	16	968	106.8	5.72	68.23	16
148679537	0.015873	0.283682	0.947669	-0.077545	Aars	alanyl-tRNA synthetase, isoform CRA_a, partial [Mus musculus]	Master Protein	0	FALSE	65.018	23	16	26	16	1055	116.5	6.1	68.23	16
19852058	0.00793651	0.283682	0.947007	-0.0785532	Dscaml1	Down syndrome cell adhesion molecule-like protein, partial [Mus musculus]	None	0	FALSE	56.578	22	7	30	4	365	40.5	9.32	110.41	7
12837652	0.015873	0.283682	0.946903	-0.078712	Mdh1	unnamed protein product [Mus musculus]	None	0	FALSE	116.939	41	15	63	15	334	36.4	6.28	208.77	15
74212599	0.0396825	0.428629	0.946757	-0.0789339	Eif4a1	unnamed protein product [Mus musculus]	None	0	FALSE	43.874	42	9	19	5	286	33	6.44	66.78	9
16740769	0.015873	0.283682	0.946667	-0.0790716	Cyp2d22	Cytochrome P450, family 2, subfamily d, polypeptide 22 [Mus musculus]	Master Protein Candidate	0	FALSE	52.106	19	8	21	5	500	56.5	6.95	67.35	8
148672557	0.015873	0.283682	0.946667	-0.0790716		mCG20388, isoform CRA_a, partial [Mus musculus]	Master Protein	0	FALSE	52.106	18	8	21	5	528	59.5	7.87	67.35	8
254939516	0.015873	0.283682	0.946667	-0.0790716	Cyp2d22	cytochrome P450, family 2, subfamily d, polypeptide 22 [Mus musculus]	Master Protein Candidate	0	FALSE	52.106	19	8	21	5	500	56.4	6.98	67.35	8
358439552	0.0238095	0.353216	0.945752	-0.0804657	Immt	MICOS complex subunit Mic60 isoform 6 [Mus musculus]	None	0	FALSE	50.486	26	13	21	13	470	52	8.34	57.04	13
18314665	0.031746	0.353216	0.945693	-0.0805564	Akr1c13	Aldo-keto reductase family 1, member C13 [Mus musculus]	None	0	FALSE	83.911	66	15	31	5	323	37	7.08	105.44	15
1763275	0.015873	0.283682	0.944867	-0.0818169	Anp32a	acidic nuclear phosphoprotein pp32 [Mus musculus]	Master Protein Candidate	0	FALSE	38.281	37	8	15	8	247	28.5	4.08	43.29	8
46395611	0.015873	0.283682	0.944867	-0.0818169	Anp32a	RecName: Full=Acidic leucine-rich nuclear phosphoprotein 32 family member A; AltName: Full=Acidic nuclear phosphoprotein pp32; AltName: Full=Leucine-rich acidic nuclear protein; Short=LANP; AltName: Full=Potent heat-stable protein phosphatase 2A inhibitor I1PP2A	Master Protein Candidate	0	FALSE	38.281	37	8	15	8	247	28.5	4.07	43.29	8
185177518	0.015873	0.283682	0.944867	-0.0818169		Chain A, Acidic leucine-rich nuclear phosphoprotein 32 family member A	Master Protein Candidate	0	FALSE	38.281	54	8	15	8	169	19.2	4.93	43.29	8
568960675	0.015873	0.283682	0.944867	-0.0818169	Anp32a	PREDICTED: acidic leucine-rich nuclear phosphoprotein 32 family member A isoform X1 [Mus musculus]	Master Protein	0	FALSE	38.281	37	8	15	8	250	28.8	4.13	43.29	8
568960677	0.015873	0.283682	0.944867	-0.0818169	Anp32a	PREDICTED: acidic leucine-rich nuclear phosphoprotein 32 family member A isoform X2 [Mus musculus]	Master Protein Candidate	0	FALSE	38.281	39	8	15	8	233	26.8	4.06	43.29	8
37573979	0.00793651	0.283682	0.94486	-0.0818278	Aars	Aars protein, partial [Mus musculus]	None	0	FALSE	43.288	22	8	16	8	507	55	6.2	46.58	8
211827288	0.00793651	0.283682	0.94486	-0.0818278	Aars	Aars protein, partial [Mus musculus]	None	0	FALSE	34.877	17	6	13	6	458	49.6	7.06	37.82	6
74213406	0.047619	0.450719	0.942995	-0.0846777	Dhrs1	unnamed protein product [Mus musculus]	None	0	FALSE	33.896	29	7	10	7	313	34	8.41	26.72	7
13542680	0.0357143	0.395584	0.942718	-0.0851011	Tubb4b	Tubulin, beta 2C [Mus musculus]	Master Protein	0	FALSE	158.939	69	20	65	3	445	49.8	4.89	225.41	20
53734646	0.0357143	0.395584	0.942718	-0.0851011	Tubb4b	Tubulin, beta 2C [Mus musculus]	Master Protein Candidate	0	FALSE	158.939	69	20	65	3	445	49.8	4.89	225.41	20
74210592	0.031746	0.353216	0.941884	-0.0863791	Asl	unnamed protein product [Mus musculus]	Master Protein Candidate	0	FALSE	145.961	46	19	68	19	464	51.7	6.96	229.01	19
148687536	0.031746	0.353216	0.941884	-0.0863791	Asl	argininosuccinate lyase, isoform CRA_a [Mus musculus]	Master Protein	0	FALSE	145.961	46	19	68	19	464	51.7	6.96	229.01	19
19483975	0.015873	0.283682	0.941349	-0.0871984	Eef1g	Eef1g protein [Mus musculus]	None	0	FALSE	62.292	44	14	32	14	317	36.9	7.42	83.45	14
74212911	0.00793651	0.283682	0.941233	-0.087376	Hyou1	unnamed protein product, partial [Mus musculus]	None	0	FALSE	207.349	49	26	71	26	812	90.3	5.27	245.72	26
6407376	0.031746	0.353216	0.941176	-0.0874628	Akr1c13	aldo-keto reductase AKR1C13 [Mus musculus]	None	0	FALSE	67.037	50	13	27	5	323	37	7.34	87.33	13
74219772	0.015873	0.283682	0.940255	-0.0888766	P4hb	unnamed protein product [Mus musculus]	None	0	FALSE	307.076	68	31	187	24	509	57	4.86	690.96	31
74196486	0.00793651	0.283682	0.940171	-0.089005	Aars	unnamed protein product [Mus musculus]	None	0	FALSE	61.058	23	15	25	15	968	106.8	5.67	63.89	15
148693639	0.015873	0.283682	0.939566	-0.0899342	Hyou1	hypoxia up-regulated 1, isoform CRA_b, partial [Mus musculus]	None	0	FALSE	68.289	43	10	24	10	332	37.2	9.39	72.36	10
26344820	0.047619	0.450719	0.939182	-0.0905226	Gstz1	unnamed protein product [Mus musculus]	Master Protein	0	FALSE	121.105	73	11	55	11	216	24.3	7.85	206.03	11
148670978	0.047619	0.450719	0.939182	-0.0905226	Gstz1	glutathione transferase zeta 1 (maleylacetoacetate isomerase), isoform CRA_c [Mus musculus]	Master Protein Candidate	0	FALSE	121.105	73	11	55	11	215	24.2	7.24	206.03	11
74149659	0.0238095	0.353216	0.938477	-0.0916074	P4hb	unnamed protein product, partial [Mus musculus]	None	0	FALSE	244.031	70	24	151	24	385	43	5.14	558.51	24
117502	0.031746	0.353216	0.938477	-0.0916074	Calr	RecName: Full=Calreticulin; AltName: Full=CRP55; AltName: Full=Calregulin; AltName: Full=Endoplasmic reticulum resident protein 60; Short=ERp60; AltName: Full=HACBP; Flags: Precursor	Master Protein	0	FALSE	242.289	67	22	119	22	416	48	4.49	413.06	22
74227675	0.031746	0.353216	0.938477	-0.0916074	Calr	unnamed protein product [Mus musculus]	Master Protein Candidate	0	FALSE	242.289	67	22	119	22	416	48	4.5	413.06	22
192865	0.015873	0.283682	0.938175	-0.0920715	Ppib	cyclophilin [Mus musculus domesticus]	Master Protein Candidate	0	FALSE	53.7	49	11	35	10	208	22.7	9.48	100.21	11
148694165	0.015873	0.283682	0.938175	-0.0920715	Ppib	peptidylprolyl isomerase B, isoform CRA_b [Mus musculus]	Master Protein	0	FALSE	53.7	47	11	35	10	216	23.7	9.55	100.21	11
74200069	0.015873	0.283682	0.937683	-0.0928285	Calr	unnamed protein product, partial [Mus musculus]	None	0	FALSE	233.832	74	20	114	20	368	42.2	4.74	406.19	20
57242927	0.015873	0.283682	0.937558	-0.0930198	Idh1	Isocitrate dehydrogenase 1 (NADP+), soluble [Mus musculus]	Master Protein	0	FALSE	221.249	75	30	109	30	414	46.6	7.17	374.23	30
148666071	0.031746	0.353216	0.936963	-0.0939364	Pdia6	protein disulfide isomerase associated 6, isoform CRA_a [Mus musculus]	None	0	FALSE	93.397	31	10	49	10	414	45.5	8.53	157.43	10
148666072	0.031746	0.353216	0.936963	-0.0939364	Pdia6	protein disulfide isomerase associated 6, isoform CRA_b, partial [Mus musculus]	None	0	FALSE	93.397	32	10	49	10	400	43.7	6.99	157.43	10
148667258	0.031746	0.353216	0.93666	-0.0944022		mCG132196, isoform CRA_b [Mus musculus]	None	0	FALSE	44.89	10	11	19	11	1420	159.3	6.67	54.77	11
148670980	0.031746	0.353216	0.936191	-0.0951245	Gstz1	glutathione transferase zeta 1 (maleylacetoacetate isomerase), isoform CRA_b [Mus musculus]	None	0	FALSE	106.528	90	10	48	10	161	18	7.28	182.24	10
334359524	0.031746	0.353216	0.935673	-0.0959244		Chain A, Calreticulin	None	0	FALSE	206.774	67	18	103	18	332	38.1	5.1	351.37	18
18044175	0.00793651	0.283682	0.935423	-0.0963098	Hyou1	Hyou1 protein [Mus musculus]	None	0	FALSE	127.402	42	15	48	15	504	56.5	9.44	167.74	15
74139525	0.00793651	0.283682	0.934888	-0.0971342	Nme2	unnamed protein product [Mus musculus]	Master Protein	0	FALSE	82.971	72	9	40	6	152	17.4	7.5	159.33	9
154550673	0.00793651	0.283682	0.934888	-0.0971342	Nme2	expressed in non-metastatic cells 2 protein, partial [Mus musculus]	Master Protein Candidate	0	FALSE	82.971	76	9	40	6	144	16.3	8.02	159.33	9
148706615	0.031746	0.353216	0.934741	-0.0973616		mCG124077, isoform CRA_d [Mus musculus]	None	0	FALSE	78.506	56	13	47	13	237	27.6	6.74	152.57	13
89573965	0.015873	0.283682	0.934562	-0.0976374	Idh1	isocitrate dehydrogenase 1, partial [Mus musculus]	None	0	FALSE	197.62	73	25	92	25	378	42.6	6.38	324.98	25
148708003	0.015873	0.283682	0.933598	-0.0991272	Hdlbp	high density lipoprotein (HDL) binding protein, isoform CRA_b [Mus musculus]	None	0	FALSE	95.995	28	20	29	20	1020	114.1	6.8	90.96	20
74224797	0.031746	0.353216	0.933526	-0.0992379	Mdh1	unnamed protein product [Mus musculus]	None	0	FALSE	123.26	43	15	62	15	334	36.5	6.93	207.15	15
26349713	0.00793651	0.283682	0.933398	-0.0994362	Gnmt	unnamed protein product [Mus musculus]	None	0	FALSE	36.772	55	3	16	3	69	7.6	7.28	63.53	3
74195675	0.015873	0.283682	0.933086	-0.0999188	Idh1	unnamed protein product [Mus musculus]	None	0	FALSE	203.941	71	28	103	28	414	46.6	7.43	353.81	28
26352311	0.015873	0.283682	0.933023	-0.100015	Idh1	unnamed protein product [Mus musculus]	None	0	FALSE	219.955	74	29	106	29	422	47.5	6.93	367.7	29
1418639862	0.015873	0.283682	0.933023	-0.100015		Chain B, Isocitrate dehydrogenase [NADP] cytoplasmic	None	0	FALSE	219.955	75	29	106	29	414	46.6	7.17	367.7	29
18043201	0.047619	0.450719	0.932945	-0.100137	Abhd14b	Abhydrolase domain containing 14b [Mus musculus]	None	0	FALSE	56.825	48	7	19	7	210	22.4	6.27	64.25	7
148689194	0.047619	0.450719	0.932945	-0.100137	Abhd14b	abhydrolase domain containing 14b, isoform CRA_b [Mus musculus]	None	0	FALSE	56.825	46	7	19	7	218	23.2	6.27	64.25	7
568998601	0.00793651	0.283682	0.931665	-0.102117	Haao	PREDICTED: 3-hydroxyanthranilate 3,4-dioxygenase isoform X2 [Mus musculus]	None	0	FALSE	95.306	66	13	39	13	252	28.6	5.82	142.49	13
568998603	0.00793651	0.283682	0.931665	-0.102117	Haao	PREDICTED: 3-hydroxyanthranilate 3,4-dioxygenase isoform X3 [Mus musculus]	None	0	FALSE	95.306	74	13	39	13	225	25.5	6.8	142.49	13
3641400	0.015873	0.283682	0.931545	-0.102303	Idh1	NADP-dependent isocitrate dehydrogenase [Mus musculus]	None	0	FALSE	216.208	72	27	100	27	414	46.6	6.93	352.12	27
149241032	0.015873	0.283682	0.931545	-0.102303		Chain B, ISOCITRATE DEHYDROGENASE [NADP] CYTOPLASMIC	None	0	FALSE	216.208	73	27	100	27	410	46.1	6.74	352.12	27
7670490	0.031746	0.353216	0.93148	-0.102404	Gstz1	unnamed protein product [Mus musculus]	None	0	FALSE	82.416	86	9	37	9	141	15.9	6.55	137.6	9
568949358	0.015873	0.283682	0.931262	-0.102741	Acsm1	PREDICTED: acyl-coenzyme A synthetase ACSM1, mitochondrial isoform X1 [Mus musculus]	None	0	FALSE	111.553	35	15	41	15	601	67	8.44	135.25	15
148682378	0.031746	0.353216	0.931163	-0.102895	Lactb2	lactamase, beta 2, isoform CRA_a, partial [Mus musculus]	None	0	FALSE	36.773	33	7	14	7	261	29.9	5.9	46.37	7
148682379	0.031746	0.353216	0.931163	-0.102895	Lactb2	lactamase, beta 2, isoform CRA_b, partial [Mus musculus]	None	0	FALSE	36.773	30	7	14	7	284	32.4	5.77	46.37	7
148666704	0.015873	0.283682	0.931	-0.103147	Spr	sepiapterin reductase, isoform CRA_a [Mus musculus]	None	0	FALSE	23.263	34	3	6	3	126	12.9	8.1	20.02	3
15277547	0.031746	0.353216	0.930674	-0.103652	Haao	3-hydroxyanthranilate 3,4-dioxygenase [Mus musculus]	Master Protein	0	FALSE	111.055	67	16	54	16	286	32.8	6.54	184.04	16
74205677	0.015873	0.283682	0.92998	-0.104728	Hdlbp	unnamed protein product [Mus musculus]	Master Protein Candidate	0	FALSE	112.953	27	24	34	24	1268	141.7	6.87	108.54	24
148708006	0.015873	0.283682	0.92998	-0.104728	Hdlbp	high density lipoprotein (HDL) binding protein, isoform CRA_d [Mus musculus]	Master Protein Candidate	0	FALSE	112.953	27	24	34	24	1268	141.7	6.87	108.54	24
148708011	0.015873	0.283682	0.92998	-0.104728	Hdlbp	high density lipoprotein (HDL) binding protein, isoform CRA_h [Mus musculus]	Master Protein	0	FALSE	112.953	26	24	34	24	1316	146.8	7.06	108.54	24
29747953	0.00793651	0.283682	0.929825	-0.10497	Hyou1	Hypoxia up-regulated 1 [Mus musculus]	None	0	FALSE	230.53	42	30	91	30	999	111.2	5.27	300.54	30
12843447	0.00793651	0.283682	0.929511	-0.105456	Akr1c13	unnamed protein product [Mus musculus]	None	0	FALSE	69.774	61	14	26	5	323	37	6.84	83.76	14
148708002	0.015873	0.283682	0.928924	-0.106368	Hdlbp	high density lipoprotein (HDL) binding protein, isoform CRA_a [Mus musculus]	None	0	FALSE	105.954	25	23	32	23	1285	143.4	6.8	102.89	23
74152795	0.00793651	0.283682	0.928919	-0.106375	Hyou1	unnamed protein product [Mus musculus]	Master Protein	0	FALSE	253.097	48	33	96	33	999	111.1	5.21	321.56	33
74192146	0.00793651	0.283682	0.928919	-0.106375	Hyou1	unnamed protein product [Mus musculus]	Master Protein Candidate	0	FALSE	253.097	48	33	96	33	999	111.1	5.19	321.56	33
74219123	0.00793651	0.283682	0.928919	-0.106375	Hyou1	unnamed protein product [Mus musculus]	Master Protein Candidate	0	FALSE	253.097	48	33	96	33	999	111.1	5.19	321.56	33
568958751	0.00793651	0.283682	0.92878	-0.10659	Hyou1	PREDICTED: hypoxia up-regulated protein 1 isoform X2 [Mus musculus]	None	0	FALSE	250.441	47	32	93	32	998	111	5.17	321.56	32
74146454	0.00793651	0.283682	0.928092	-0.10766	Acsm1	unnamed protein product, partial [Mus musculus]	None	0	FALSE	130.128	43	16	45	16	531	60	6.48	160.45	16
1581447701	0.00793651	0.283682	0.9277	-0.10827		Chain A, Aldo-keto reductase family 1 member C13	None	0	FALSE	59.078	55	13	24	5	321	36.7	6.44	72.72	13
18043634	0.015873	0.283682	0.927368	-0.108785	Tmed5	Transmembrane emp24 protein transport domain containing 5 [Mus musculus]	Master Protein Candidate	0	FALSE	7.837	10	2	4	2	229	26.2	4.93	10.68	2
148688187	0.015873	0.283682	0.927368	-0.108785	Tmed5	transmembrane emp24 protein transport domain containing 5, isoform CRA_a [Mus musculus]	Master Protein	0	FALSE	7.837	10	2	4	2	229	26.2	4.93	10.68	2
148708009	0.015873	0.283682	0.925604	-0.111533	Hdlbp	high density lipoprotein (HDL) binding protein, isoform CRA_g [Mus musculus]	None	0	FALSE	74.541	26	16	24	16	825	92.2	8.75	78.48	16
568998606	0.015873	0.283682	0.925189	-0.112179	Haao	PREDICTED: 3-hydroxyanthranilate 3,4-dioxygenase isoform X4 [Mus musculus]	None	0	FALSE	62.724	57	9	37	9	168	19.9	7.17	130.65	9
148708008	0.015873	0.283682	0.924783	-0.112813	Hdlbp	high density lipoprotein (HDL) binding protein, isoform CRA_f [Mus musculus]	None	0	FALSE	71.373	23	15	23	15	827	92.3	8.87	75.97	15
1083243	0.00793651	0.283682	0.924378	-0.113445		calcium binding 140k protein - mouse (fragment)	None	0	FALSE	145.133	43	20	58	20	652	72.2	4.72	203.2	20
15487300	0.00793651	0.283682	0.922339	-0.11663	Acsm1	medium-chain acyl-CoA synthetase [Mus musculus]	Master Protein	0	FALSE	177.332	51	20	59	20	573	64.7	7.17	213.51	20
148708930	0.047619	0.450719	0.922078	-0.117039	Nqo2	NAD(P)H dehydrogenase, quinone 2, isoform CRA_b [Mus musculus]	None	0	FALSE	26.893	32	4	7	4	187	21.5	6.2	23.07	4
148695312	0.031746	0.353216	0.920039	-0.120232	Prdx6b	mCG48959 [Mus musculus]	None	0	FALSE	18.681	13	3	19	3	224	25	6.37	46.35	3
12842885	0.015873	0.283682	0.919617	-0.120895	Ugt2a3	unnamed protein product [Mus musculus]	Master Protein	0	FALSE	43.542	21	8	21	8	534	61.1	7.65	52.96	8
19387963	0.015873	0.283682	0.919617	-0.120895	Ugt2a3	UDP glucuronosyltransferase 2 family, polypeptide A3 [Mus musculus]	Master Protein Candidate	0	FALSE	43.542	21	8	21	8	534	61.1	7.93	52.96	8
254587896	0.015873	0.283682	0.919617	-0.120895	Ugt2a3	UDP-glucuronosyltransferase 2A3 precursor [Mus musculus]	Master Protein Candidate	0	FALSE	43.542	21	8	21	8	534	61.1	7.93	52.96	8
148685227	0.015873	0.283682	0.919431	-0.121186	Acsm1	acyl-CoA synthetase medium-chain family member 1 [Mus musculus]	None	0	FALSE	150.98	46	19	54	19	573	64.7	7.17	181.71	19
2275019	0.031746	0.353216	0.916992	-0.125019	Gstm6	glutathione-S-transferase class M5 [Mus musculus]	None	0	FALSE	35.748	34	8	30	4	218	25.7	6.57	82.76	8
568921846	0.031746	0.353216	0.916992	-0.125019	Gstm6	PREDICTED: glutathione S-transferase Mu 6 isoform X4 [Mus musculus]	None	0	FALSE	24.031	44	7	25	5	192	22.7	5.5	68.5	7
568905604	0.047619	0.450719	0.915174	-0.127881	Cyp27a1	PREDICTED: sterol 26-hydroxylase, mitochondrial isoform X1 [Mus musculus]	None	0	FALSE	69.423	38	10	21	10	391	44.7	8.54	76.3	10
74180774	0.00793651	0.283682	0.914972	-0.1282	Lactb2	unnamed protein product [Mus musculus]	Master Protein	0	FALSE	42.432	36	8	17	8	288	32.7	6.33	57.63	8
1304157	0.015873	0.283682	0.914286	-0.129283	Hspa5	78 kDa glucose-regulated protein [Mus musculus]	None	0	FALSE	409.512	59	37	247	34	655	72.4	5.2	904.52	37
12835845	0.015873	0.283682	0.914116	-0.12955	Hspa5	unnamed protein product [Mus musculus]	None	0	FALSE	417.606	61	37	248	34	655	72.4	5.11	923.19	37
148675902	0.00793651	0.283682	0.91376	-0.130113	Mdh1	malate dehydrogenase 1, NAD (soluble), isoform CRA_a, partial [Mus musculus]	None	0	FALSE	17.476	15	2	7	2	143	15.4	4.59	21.63	2
148704836	0.031746	0.353216	0.913615	-0.130342	Scfd1	sec1 family domain containing 1, partial [Mus musculus]	None	0	FALSE	5.981	8	3	4	3	479	53.8	8.91	4.33	3
807201067	0.031746	0.353216	0.913615	-0.130342	Scfd1	sec1 family domain-containing protein 1 isoform 2 [Mus musculus]	None	0	FALSE	5.981	10	3	4	3	390	44	5.87	4.33	3
568966666	0.015873	0.283682	0.912724	-0.131749	Ftcd	PREDICTED: formimidoyltransferase-cyclodeaminase isoform X2 [Mus musculus]	None	0	FALSE	96.071	55	16	37	16	392	42.9	6.95	123.15	16
74138251	0.015873	0.283682	0.912488	-0.132123	Hspa5	unnamed protein product [Mus musculus]	Master Protein	0	FALSE	435.395	63	40	260	37	655	72.4	5.16	944.67	40
74198974	0.015873	0.283682	0.912488	-0.132123	Hspa5	unnamed protein product [Mus musculus]	Master Protein Candidate	0	FALSE	435.395	63	40	260	37	655	72.4	5.16	944.67	40
148706614	0.0238095	0.353216	0.911907	-0.133041		mCG124077, isoform CRA_c [Mus musculus]	None	0	FALSE	44.157	45	6	23	6	157	17.8	6.68	83.94	6
74198293	0.015873	0.283682	0.911591	-0.133541	Hspa5	unnamed protein product [Mus musculus]	None	0	FALSE	416.377	60	39	252	36	655	72.4	5.22	909.14	39
13938051	0.00793651	0.283682	0.910714	-0.13493	Pdha1	Pyruvate dehydrogenase E1 alpha 1 [Mus musculus]	Master Protein	0	FALSE	40.214	35	11	15	11	390	43.2	8.19	38.15	11
2598562	0.015873	0.283682	0.910433	-0.135375	Hspa5	BiP [Mus musculus]	None	0	FALSE	429.455	62	39	253	36	655	72.4	5.2	930.9	39
148684154	0.015873	0.283682	0.909453	-0.136929	Lasp1	LIM and SH3 protein 1, isoform CRA_a [Mus musculus]	None	0	FALSE	8.59	13	2	3	2	227	25.8	6.52	10.64	2
205371731	0.015873	0.283682	0.909003	-0.137643	Serpina1c	RecName: Full=Alpha-1-antitrypsin 1-3; AltName: Full=Alpha-1 protease inhibitor 3; AltName: Full=Alpha-1 protease inhibitor 6; AltName: Full=Alpha-1-antitrypsin 1-6; AltName: Full=Serine protease inhibitor 1-3; AltName: Full=Serine protease inhibitor 1-6; AltName: Full=Serine protease inhibitor A1c; Short=Serpin A1c; Flags: Precursor	None	0	FALSE	51.414	35	10	24	3	412	45.8	5.44	81.8	10
74220199	0.015873	0.283682	0.908555	-0.138355	Hspa5	unnamed protein product, partial [Mus musculus]	None	0	FALSE	399.01	62	38	236	35	619	68.5	5.26	835.77	38
148676670	0.015873	0.283682	0.908284	-0.138785	Hspa5	heat shock 70kD protein 5 (glucose-regulated protein), isoform CRA_b [Mus musculus]	None	0	FALSE	320.886	64	33	196	32	507	56.3	5.14	707.02	33
148667807	0.031746	0.353216	0.906588	-0.141481	Idh1	isocitrate dehydrogenase 1 (NADP+), soluble, isoform CRA_b, partial [Mus musculus]	None	0	FALSE	45.414	44	5	18	5	137	15.4	6.76	63.62	5
793931	0.031746	0.353216	0.905075	-0.14389	Tdo2	tryptophan-2,3-dioxygenase [Mus musculus]	None	0	FALSE	22.313	13	4	5	4	406	47.8	7.15	14.88	4
33563252	0.031746	0.353216	0.904947	-0.144095	Fga	fibrinogen alpha chain isoform 2 precursor [Mus musculus]	Master Protein Candidate	0	FALSE	90.717	38	15	33	15	557	61.3	7.47	103.05	15
148683476	0.031746	0.353216	0.904947	-0.144095	Fga	fibrinogen, alpha polypeptide, isoform CRA_a [Mus musculus]	Master Protein	0	FALSE	90.717	27	15	33	15	789	87.3	6.11	103.05	15
148683477	0.031746	0.353216	0.904947	-0.144095	Fga	fibrinogen, alpha polypeptide, isoform CRA_b, partial [Mus musculus]	Master Protein Candidate	0	FALSE	90.717	37	15	33	15	574	63.1	7.3	103.05	15
167555029	0.031746	0.353216	0.904947	-0.144095	Fga	fibrinogen alpha chain isoform 1 preproprotein [Mus musculus]	Master Protein Candidate	0	FALSE	90.717	27	15	33	15	789	87.4	6.11	103.05	15
12851714	0.031746	0.353216	0.903955	-0.145677	Scfd1	unnamed protein product [Mus musculus]	Master Protein	0	FALSE	7.323	8	4	5	4	639	72.3	6.27	6.34	4
20379941	0.031746	0.353216	0.903955	-0.145677	Scfd1	Scfd1 protein [Mus musculus]	Master Protein Candidate	0	FALSE	7.323	9	4	5	4	575	65	5.44	6.34	4
58037481	0.031746	0.353216	0.903955	-0.145677	Scfd1	sec1 family domain-containing protein 1 isoform 1 [Mus musculus]	Master Protein Candidate	0	FALSE	7.323	8	4	5	4	639	72.3	6.38	6.34	4
21618868	0.015873	0.283682	0.901559	-0.149505	Gstm6	Glutathione S-transferase, mu 6 [Mus musculus]	Master Protein Candidate	0	FALSE	46.547	48	10	33	6	218	25.6	6.24	93.52	10
148669985	0.015873	0.283682	0.901559	-0.149505		mCG21728, isoform CRA_c [Mus musculus]	Master Protein	0	FALSE	46.547	45	10	33	6	232	27.3	5.91	93.52	10
568921840	0.015873	0.283682	0.901559	-0.149505	Gstm6	PREDICTED: glutathione S-transferase Mu 6 isoform X1 [Mus musculus]	Master Protein Candidate	0	FALSE	46.547	48	10	33	6	253	29.8	5.74	93.52	10
568921842	0.015873	0.283682	0.901559	-0.149505	Gstm6	PREDICTED: glutathione S-transferase Mu 6 isoform X2 [Mus musculus]	Master Protein Candidate	0	FALSE	46.547	46	10	33	6	227	26.6	5.54	93.52	10
568921844	0.015873	0.283682	0.901559	-0.149505	Gstm6	PREDICTED: glutathione S-transferase Mu 6 isoform X3 [Mus musculus]	Master Protein Candidate	0	FALSE	46.547	49	10	33	6	216	25.4	6.93	93.52	10
148685766	0.015873	0.283682	0.896422	-0.15775	Acadsb	acyl-Coenzyme A dehydrogenase, short/branched chain, isoform CRA_a, partial [Mus musculus]	None	0	FALSE	33.439	20	6	7	6	480	53.5	8.38	24.55	6
148701031	0.031746	0.353216	0.894784	-0.160388	Acy3	aspartoacylase (aminoacylase) 3, isoform CRA_b [Mus musculus]	None	0	FALSE	9.983	18	3	4	3	311	34.3	5.48	13.04	3
148701033	0.031746	0.353216	0.894784	-0.160388	Acy3	aspartoacylase (aminoacylase) 3, isoform CRA_c [Mus musculus]	None	0	FALSE	9.983	18	3	4	3	317	34.7	5.83	13.04	3
309122	0.015873	0.283682	0.894539	-0.160784	C3	preprocomplement component C3 [Mus musculus]	Master Protein Candidate	0	FALSE	79.117	14	19	32	19	1663	186.4	6.87	76.26	19
387114	0.015873	0.283682	0.894539	-0.160784	C3	complement component C3 prepropeptide, last, partial [Mus musculus]	Master Protein Candidate	0	FALSE	79.117	14	19	32	19	1663	186.4	6.81	76.26	19
148706296	0.015873	0.283682	0.894539	-0.160784	C3	complement component 3, isoform CRA_c, partial [Mus musculus]	Master Protein	0	FALSE	79.117	14	19	32	19	1681	188.3	6.73	76.26	19
341940525	0.015873	0.283682	0.894539	-0.160784	C3	RecName: Full=Complement C3; AltName: Full=HSE-MSF; Contains: RecName: Full=Complement C3 beta chain; Contains: RecName: Full=C3-beta-c; Short=C3bc; Contains: RecName: Full=Complement C3 alpha chain; Contains: RecName: Full=C3a anaphylatoxin; Contains: RecName: Full=Acylation stimulating protein; Short=ASP; AltName: Full=C3adesArg; Contains: RecName: Full=Complement C3b alpha' chain; Contains: Re…	Master Protein Candidate	0	FALSE	79.117	14	19	32	19	1663	186.4	6.73	76.26	19
193645	0.015873	0.283682	0.891283	-0.166044	Hspa5	glucose-regulated protein 78, partial [Mus musculus]	None	0	FALSE	91.396	76	12	69	12	168	18.9	4.72	238.75	12
387113	0.015873	0.283682	0.890855	-0.166737	Hspa5	immunoglobulin heavy chain binding protein, partial [Mus musculus]	None	0	FALSE	80.646	70	10	60	10	142	16.2	4.69	225.87	10
38372554	0.015873	0.283682	0.890363	-0.167535	Tgoln2	RecName: Full=Trans-Golgi network integral membrane protein 2; AltName: Full=TGN38B; Flags: Precursor	Master Protein	0	FALSE	5.54	5	2	3	2	363	38.8	5.22	1.88	2
74200346	0.015873	0.283682	0.890363	-0.167535	Tgoln1	unnamed protein product [Mus musculus]	Master Protein Candidate	0	FALSE	5.54	5	2	3	2	353	37.8	5.34	1.88	2
74208163	0.015873	0.283682	0.890363	-0.167535	Tgoln2	unnamed protein product [Mus musculus]	Master Protein Candidate	0	FALSE	5.54	5	2	3	2	363	38.8	5.22	1.88	2
13938017	0.00793651	0.283682	0.889328	-0.169212	Aqp1	Aqp1 protein [Mus musculus]	Master Protein	0	FALSE	5.015	6	2	4	2	269	28.8	7.43	8.31	2
26349441	0.00793651	0.283682	0.889328	-0.169212	Aqp1	unnamed protein product [Mus musculus]	Master Protein Candidate	0	FALSE	5.015	6	2	4	2	269	28.8	7.43	8.31	2
74147584	0.00793651	0.283682	0.889328	-0.169212	Aqp1	unnamed protein product [Mus musculus]	Master Protein Candidate	0	FALSE	5.015	6	2	4	2	269	28.8	7.84	8.31	2
148677934	0.00793651	0.283682	0.888681	-0.170262	Aldh7a1	aldehyde dehydrogenase family 7, member A1, isoform CRA_c [Mus musculus]	None	0	FALSE	78.454	46	8	21	8	266	28.5	6.9	77.68	8
148677935	0.00793651	0.283682	0.888681	-0.170262	Aldh7a1	aldehyde dehydrogenase family 7, member A1, isoform CRA_d [Mus musculus]	None	0	FALSE	78.454	37	8	21	8	333	36.2	8.44	77.68	8
148677936	0.00793651	0.283682	0.888681	-0.170262	Aldh7a1	aldehyde dehydrogenase family 7, member A1, isoform CRA_a [Mus musculus]	None	0	FALSE	78.454	40	8	21	8	305	33	6.98	77.68	8
15928397	0.015873	0.283682	0.887297	-0.172511	Prdx5	Prdx5 protein, partial [Mus musculus]	None	0	FALSE	37.85	78	5	18	5	89	9.6	5.38	63.76	5
226778	0.015873	0.283682	0.88674	-0.173416		carbonic anhydrase III	None	0	FALSE	180.476	68	15	87	15	259	29.3	7.87	316.62	15
309127	0.015873	0.283682	0.88674	-0.173416	Car3	carbonic anhydrase III (EC 4.2.1.1) [Mus musculus]	None	0	FALSE	180.476	68	15	87	15	260	29.5	7.85	316.62	15
257305769	0.047619	0.450719	0.884721	-0.176706		unnamed protein product [Mus musculus]	None	0	FALSE	98.02	21	21	37	20	1336	147.2	6.71	104.37	21
6755114	0.031746	0.353216	0.88447	-0.177115	Prdx5	peroxiredoxin-5, mitochondrial isoform 1 precursor [Mus musculus]	Master Protein	0	FALSE	78.498	60	10	36	10	210	21.9	8.85	131.7	10
10129957	0.031746	0.353216	0.88447	-0.177115	Prdx5	peroxiredoxin 5 [Mus musculus]	Master Protein Candidate	0	FALSE	78.498	77	10	36	10	162	17	7.87	131.7	10
74193815	0.031746	0.353216	0.88447	-0.177115	Prdx5	unnamed protein product, partial [Mus musculus]	Master Protein Candidate	0	FALSE	78.498	63	10	36	10	199	20.7	8.78	131.7	10
74220848	0.031746	0.353216	0.88447	-0.177115	Prdx5	unnamed protein product, partial [Mus musculus]	Master Protein Candidate	0	FALSE	78.498	60	10	36	10	208	21.6	8.66	131.7	10
1284806251	0.031746	0.353216	0.881356	-0.182203		peroxiredoxin-5, mitochondrial isoform 2 precursor [Mus musculus]	None	0	FALSE	51.313	43	7	24	7	171	17.9	9.03	86.27	7
12836415	0.00793651	0.283682	0.878352	-0.187128	Acadsb	unnamed protein product [Mus musculus]	Master Protein	0	FALSE	40.262	26	7	9	7	432	47.8	7.87	33.39	7
32450737	0.00793651	0.283682	0.878352	-0.187128	Acadsb	Acyl-Coenzyme A dehydrogenase, short/branched chain [Mus musculus]	Master Protein Candidate	0	FALSE	40.262	26	7	9	7	432	47.8	7.87	33.39	7
26326179	0.015873	0.283682	0.875723	-0.191454	Gm5766	unnamed protein product [Mus musculus]	None	0	FALSE	8.349	11	2	4	2	206	23.2	10.08	10.41	2
8886499	0.00793651	0.283682	0.874768	-0.193028	Cml2; Nat8f2	putative N-acetyltransferase Camello 2 [Mus musculus]	Master Protein Candidate	0	FALSE	15.434	9	2	6	2	238	26.4	9.58	15.53	2
26341198	0.00793651	0.283682	0.874768	-0.193028	Cml2; Nat8f2	unnamed protein product [Mus musculus]	Master Protein	0	FALSE	15.434	9	2	6	2	238	26.4	9.58	15.53	2
31542409	0.00793651	0.283682	0.874768	-0.193028	Cml2; Nat8f2	N-acetyltransferase family 8 member 2 [Mus musculus]	Master Protein Candidate	0	FALSE	15.434	9	2	6	2	238	26.4	9.58	15.53	2
31324698	0.015873	0.283682	0.874317	-0.193772	Ugt1a6b	UDP glycosyltransferase 1 family polypeptide A9 [Mus musculus]	Master Protein Candidate	0	FALSE	53.104	22	9	27	4	531	60.4	8.69	85.55	9
148708178	0.015873	0.283682	0.874317	-0.193772	Ugt1a6b	mCG14318, isoform CRA_e [Mus musculus]	Master Protein	0	FALSE	53.104	22	9	27	4	531	60.4	8.69	85.55	9
284413688	0.015873	0.283682	0.874317	-0.193772	Ugt1a6b	UDP glucuronosyltransferase 1 family, polypeptide A6B precursor [Mus musculus]	None	0	FALSE	49.293	20	8	26	3	531	60.5	8.69	83.5	8
148698648	0.015873	0.283682	0.874275	-0.193842	Akr1a1	aldo-keto reductase family 1, member A4 (aldehyde reductase) [Mus musculus]	None	0	FALSE	82.497	66	16	42	16	272	30.2	6.84	129.27	16
12848244	0.031746	0.353216	0.87343	-0.195236	Akr1a1	unnamed protein product [Mus musculus]	None	0	FALSE	105.872	63	18	50	18	325	36.6	7.39	161.88	18
15593264	0.031746	0.353216	0.872659	-0.19651	Fgb	fibrinogen B-beta-chain, partial [Mus musculus]	None	0	FALSE	51.358	53	10	19	10	236	27	8.09	57.27	10
497942	0.015873	0.283682	0.872611	-0.196589	Ugt1a6a	UGT1.6 [Mus musculus]	None	0	FALSE	49.349	19	8	26	3	531	60.4	8.69	82.46	8
1660992	0.015873	0.283682	0.872611	-0.196589	Ugt1a6a	phenol UDP-glucuronosyltransferase [Mus musculus]	None	0	FALSE	49.349	19	8	26	3	531	60.4	8.7	82.46	8
31324696	0.015873	0.283682	0.872611	-0.196589	Ugt1a6a	UDP glycosyltransferase 1 family polypeptide A7 [Mus musculus]	None	0	FALSE	45.537	18	7	25	2	531	60.4	8.69	80.41	7
33186906	0.015873	0.283682	0.872611	-0.196589	Ugt1a6a	UDP-glucuronosyltransferase 1-6 precursor [Mus musculus]	None	0	FALSE	49.349	19	8	26	3	531	60.4	8.62	82.46	8
47124127	0.015873	0.283682	0.872611	-0.196589	Ugt1a6a	Ugt1a6a protein [Mus musculus]	None	0	FALSE	49.349	19	8	26	3	531	60.4	8.56	82.46	8
22653628	0.031746	0.353216	0.872587	-0.196629	Akr1a1	RecName: Full=Aldo-keto reductase family 1 member A1; AltName: Full=Alcohol dehydrogenase [NADP(+)]; AltName: Full=Aldehyde reductase; AltName: Full=Glucuronate reductase; AltName: Full=Glucuronolactone reductase	Master Protein	0	FALSE	113.038	66	19	53	19	325	36.6	7.39	170.74	19
74226780	0.031746	0.353216	0.872587	-0.196629	Akr1a1	unnamed protein product [Mus musculus]	Master Protein Candidate	0	FALSE	113.038	66	19	53	19	325	36.6	7.39	170.74	19
411024310	0.031746	0.353216	0.872587	-0.196629		Chain A, Alcohol dehydrogenase [NADP(+)]	Master Protein Candidate	0	FALSE	113.038	67	19	53	19	324	36.4	7.39	170.74	19
12850076	0.015873	0.283682	0.872521	-0.196738	Psma2	unnamed protein product [Mus musculus]	None	0	FALSE	14.425	19	3	8	3	234	26	7.94	17.78	3
26343477	0.015873	0.283682	0.872521	-0.196738		unnamed protein product, partial [Mus musculus]	None	0	FALSE	13.148	18	2	6	2	183	20.8	6.54	12.5	2
74193793	0.015873	0.283682	0.872521	-0.196738	Psma2	unnamed protein product [Mus musculus]	Master Protein	0	FALSE	23.519	26	4	9	4	247	27.5	8.22	22.03	4
74225230	0.015873	0.283682	0.872521	-0.196738	Psma2	unnamed protein product [Mus musculus]	Master Protein Candidate	0	FALSE	23.519	28	4	9	4	234	25.9	7.43	22.03	4
378792359	0.015873	0.283682	0.872521	-0.196738	Psma2	Chain A, Proteasome Subunit Alpha Type-2	Master Protein Candidate	0	FALSE	23.519	28	4	9	4	234	25.9	8.32	22.03	4
12848322	0.031746	0.353216	0.871845	-0.197857	Akr1a1	unnamed protein product [Mus musculus]	None	0	FALSE	106.449	57	17	48	17	325	36.5	7.17	159.03	17
28386164	0.031746	0.353216	0.871373	-0.198637	Akr1a1	Aldo-keto reductase family 1, member A4 (aldehyde reductase) [Mus musculus]	None	0	FALSE	111.772	64	18	52	18	325	36.6	7.64	168.58	18
148682335	0.015873	0.283682	0.867701	-0.204731	Adhfe1	alcohol dehydrogenase, iron containing, 1, isoform CRA_b [Mus musculus]	Master Protein	0	FALSE	8.85	5	2	4	2	465	49.9	7.58	11.4	2
568905511	0.015873	0.283682	0.867701	-0.204731	Adhfe1	PREDICTED: hydroxyacid-oxoacid transhydrogenase, mitochondrial isoform X1 [Mus musculus]	Master Protein Candidate	0	FALSE	8.85	6	2	4	2	433	46.5	7.31	11.4	2
1270111384	0.015873	0.283682	0.867701	-0.204731		hydroxyacid-oxoacid transhydrogenase, mitochondrial isoform 3 [Mus musculus]	Master Protein Candidate	0	FALSE	8.85	6	2	4	2	397	42.7	7.12	11.4	2
1270111440	0.015873	0.283682	0.867701	-0.204731		hydroxyacid-oxoacid transhydrogenase, mitochondrial isoform 2 [Mus musculus]	Master Protein Candidate	0	FALSE	8.85	6	2	4	2	419	45	7.12	11.4	2
1039730031	0.031746	0.353216	0.867159	-0.205632	Aox3	PREDICTED: aldehyde oxidase 3 isoform X3 [Mus musculus]	None	0	FALSE	93.714	22	18	32	17	1111	122.1	6.14	96.07	18
12844914	0.0238095	0.353216	0.867047	-0.205819	Prdx5	unnamed protein product [Mus musculus]	None	0	FALSE	53.268	32	6	27	6	211	22.5	9	96.34	6
12847479	0.031746	0.353216	0.866795	-0.206237	Akr1a1	unnamed protein product [Mus musculus]	None	0	FALSE	103.302	61	18	51	18	325	36.5	7.39	160.4	18
12848338	0.031746	0.353216	0.866795	-0.206237	Akr1a1	unnamed protein product [Mus musculus]	None	0	FALSE	103.302	61	18	51	18	325	36.5	7.39	160.4	18
31982861	0.00793651	0.283682	0.86351	-0.211716	Car3	carbonic anhydrase 3 [Mus musculus]	Master Protein Candidate	0	FALSE	247.273	89	20	127	20	260	29.3	7.37	448.91	20
148673185	0.00793651	0.283682	0.86351	-0.211716	Car3	carbonic anhydrase 3, isoform CRA_b [Mus musculus]	Master Protein	0	FALSE	247.273	84	20	127	20	276	31.2	8.24	448.91	20
6644338	0.0396825	0.428629	0.863158	-0.212304	Prdx5	peroxiredoxin V [Mus musculus]	None	0	FALSE	56.983	45	8	28	8	209	22	8.66	93.33	8
148694192	0.031746	0.353216	0.857019	-0.222601	Lactb	lactamase, beta [Mus musculus]	Master Protein	0	FALSE	6.145	5	2	3	2	551	60.7	8.9	7.64	2
6983853	0.031746	0.353216	0.845679	-0.241818	Arpc3	Arp2/3 complex subunit p21-Arc [Mus musculus]	Master Protein	0	FALSE	13.851	28	5	6	5	178	20.5	8.59	11.8	5
148706294	0.00793651	0.283682	0.838222	-0.254595	C3	complement component 3, isoform CRA_a, partial [Mus musculus]	None	0	FALSE	11.152	13	3	6	3	215	24.1	8.4	14.58	3
12847100	0.00793651	0.283682	0.836906	-0.256863	Akr1a1	unnamed protein product, partial [Mus musculus]	None	0	FALSE	62.926	55	12	29	12	252	28.9	7.3	94.06	12
148675903	0.015873	0.283682	0.835116	-0.259952	Mdh1	malate dehydrogenase 1, NAD (soluble), isoform CRA_b, partial [Mus musculus]	None	0	FALSE	18.638	35	3	15	3	80	9.1	4.81	48.45	3
12847184	0.015873	0.283682	0.828413	-0.271577	Akr1a1	unnamed protein product, partial [Mus musculus]	None	0	FALSE	79.472	62	13	34	13	252	28.9	7.06	117.66	13
1200246	0.00793651	0.283682	0.807273	-0.308872	S100a8	MRP8 protein [Mus musculus]	None	0	FALSE	11.361	57	3	7	3	89	10.3	5.68	20.46	3
51873768	0.00793651	0.283682	0.784173	-0.350757	S100a8	S100 calcium binding protein A8 (calgranulin A) [Mus musculus]	Master Protein	0	FALSE	19.909	81	4	8	4	89	10.3	5.68	25.62	4
148706090	0.00793651	0.283682	0.78021	-0.358065	2810007J24Rik; Sult2a8	RIKEN cDNA 2810007J24, isoform CRA_b [Mus musculus]	None	0	FALSE	24.99	83	5	14	5	60	7.1	5.83	39.36	5
755551687	0.00793651	0.283682	0.769024	-0.378899	Csad	PREDICTED: cysteine sulfinic acid decarboxylase isoform X1 [Mus musculus]	None	0	FALSE	87.793	43	13	31	13	463	51.6	6.48	103.7	13
755551701	0.00793651	0.283682	0.769024	-0.378899	Csad	PREDICTED: cysteine sulfinic acid decarboxylase isoform X4 [Mus musculus]	None	0	FALSE	84.524	45	12	29	12	428	47.3	7.74	99.02	12
1039748914	0.00793651	0.283682	0.769024	-0.378899	Csad	PREDICTED: cysteine sulfinic acid decarboxylase isoform X2 [Mus musculus]	None	0	FALSE	87.793	40	13	31	13	500	55	7.9	103.7	13
1315690770	0.00793651	0.283682	0.769024	-0.378899		cysteine sulfinic acid decarboxylase isoform 2 [Mus musculus]	None	0	FALSE	87.793	50	13	31	13	398	44.2	6.84	103.7	13
21594473	0.00793651	0.283682	0.766397	-0.383836	2810007J24Rik; Sult2a8	2810007J24Rik protein [Mus musculus]	Master Protein Candidate	0	FALSE	84.479	55	14	37	14	282	33.3	7.02	115.09	14
148706092	0.00793651	0.283682	0.766397	-0.383836	2810007J24Rik; Sult2a8	RIKEN cDNA 2810007J24, isoform CRA_a [Mus musculus]	Master Protein	0	FALSE	84.479	55	14	37	14	282	33.3	7.02	115.09	14
13785552	0.0396825	0.428629	0.751886	-0.411414	Slco1a5	organic anion transporting polypeptide 3 [Mus musculus]	None	0	FALSE	14.014	5	3	7	3	670	74.8	7.94	22.41	3
27734554	0.0396825	0.428629	0.751886	-0.411414	Slco1a5	RecName: Full=Solute carrier organic anion transporter family member 1A5; AltName: Full=Organic anion-transporting polypeptide 3; Short=OATP-3; AltName: Full=Sodium-independent organic anion transporter 3; AltName: Full=Solute carrier family 21 member 7	None	0	FALSE	14.014	5	3	7	3	670	74.6	7.94	22.41	3
169313596	0.00793651	0.283682	0.747292	-0.420255	2810007J24Rik; Sult2a8	sulfotransferase-like protein 2 [Mus musculus]	None	0	FALSE	53.887	59	8	20	8	157	18.6	8.09	65.07	8
148672056	0.00793651	0.283682	0.738095	-0.438121	Csad	cysteine sulfinic acid decarboxylase, isoform CRA_a [Mus musculus]	Master Protein	0	FALSE	94.117	42	14	36	14	493	55.1	6.61	119.15	14
20429722	0.00793651	0.283682	0.736981	-0.4403	Csad	cysteine sulfinic acid decarboxylase [Mus musculus]	None	0	FALSE	85.653	37	13	34	13	493	55.1	6.61	109.53	13
8170809	0.015873	0.283682	0.708151	-0.497872	Selenbp2	AP56 [Mus musculus]	Master Protein	0	FALSE	302.936	83	31	131	7	472	52.6	6.18	506.17	31
148706801	0.015873	0.283682	0.706503	-0.501233		mCG125538 [Mus musculus]	None	0	FALSE	167.817	78	16	67	3	290	32.3	6.58	268.17	16
12963797	0.015873	0.283682	0.700724	-0.513082	Slco1a6	solute carrier organic anion transporter family member 1A6 [Mus musculus]	None	0	FALSE	10.369	4	2	4	2	670	74.1	7.99	13.92	2
48735214	0.015873	0.283682	0.700724	-0.513082	Slco1a6	Solute carrier organic anion transporter family, member 1a6 [Mus musculus]	None	0	FALSE	10.369	4	2	4	2	670	74.2	7.85	13.92	2
840650	0.031746	0.353216	0.681329	-0.553577	Hsd3b5	3-ketosteroid reductase [Mus musculus domesticus]	Master Protein Candidate	0	FALSE	23.792	15	5	5	4	373	41.9	9.1	15.38	5
113680667	0.031746	0.353216	0.681329	-0.553577	Hsd3b5	NADPH-dependent 3-keto-steroid reductase Hsd3b5 [Mus musculus]	Master Protein	0	FALSE	23.792	15	5	5	4	373	41.9	9.01	15.38	5
15667243	0.0396825	0.428629	0.570119	-0.810665	Hsd3b6	3 beta-hydroxysteroid dehydrogenase isomerase VI [Mus musculus]	None	0	FALSE	22.703	16	4	7	3	373	41.8	6.35	18	4
25955696	0.0396825	0.428629	0.570119	-0.810665	Hsd3b2	Hydroxy-delta-5-steroid dehydrogenase, 3 beta- and steroid delta-isomerase 2 [Mus musculus]	None	0	FALSE	20.573	10	3	6	2	373	42	6.54	15.98	3
31419724	0.0396825	0.428629	0.570119	-0.810665	Hsd3b6	Hsd3b6 protein [Mus musculus]	None	0	FALSE	22.703	16	4	7	3	373	42	6.19	18	4
39979279	0.0396825	0.428629	0.570119	-0.810665	Hsd3b6	3beta-hydroxysteroid dehydrogenase VI [Mus musculus]	None	0	FALSE	22.703	16	4	7	3	373	41.9	6.19	18	4
74209271	0.0396825	0.428629	0.570119	-0.810665	Hsd3b6	unnamed protein product [Mus musculus]	None	0	FALSE	22.703	16	4	7	3	373	42	6.35	18	4
148707019	0.0396825	0.428629	0.570119	-0.810665		mCG119535, isoform CRA_a [Mus musculus]	None	0	FALSE	20.573	10	3	6	2	373	41.9	6.37	15.98	3
755503388	0.0396825	0.428629	0.570119	-0.810665	Hsd3b2	PREDICTED: 3 beta-hydroxysteroid dehydrogenase/Delta 5--_4-isomerase type 2 isoform X2 [Mus musculus]	None	0	FALSE	20.573	11	3	6	2	332	37.3	6.73	15.98	3
1039763827	0.0396825	0.428629	0.570119	-0.810665	Hsd3b3	PREDICTED: 3 beta-hydroxysteroid dehydrogenase/Delta 5--_4-isomerase type 3 isoform X3 [Mus musculus]	None	0	FALSE	24.432	18	5	8	4	387	43.8	8.79	18	5
1327850606	0.0396825	0.428629	0.570119	-0.810665		3 beta-hydroxysteroid dehydrogenase/Delta 5--_4-isomerase type 2 [Mus musculus]	None	0	FALSE	20.573	10	3	6	2	373	41.9	6.37	15.98	3
4557948	0.015873	0.283682	0.466042	-1.10147		Chain E, Modified Glutathione S-Transferase (Pi) Complexed With S (P- Nitrobenzyl)glutathione	None	0	FALSE	117.589	47	8	70	8	209	23.5	7.96	280.57	8
340707738	0.015873	0.283682	0.466042	-1.10147		Chain B, Glutathione S-transferase P 1	None	0	FALSE	117.589	47	8	70	8	209	23.4	7.96	280.57	8
1226238	0.015873	0.283682	0.465318	-1.10371	Cyp7b1	cytochrome P450 Cyp7b1 [Mus musculus]	Master Protein	0	FALSE	13.463	8	3	6	3	507	58.4	8.94	16.27	3
74146205	0.015873	0.283682	0.465318	-1.10371	Cyp7b1	unnamed protein product [Mus musculus]	Master Protein Candidate	0	FALSE	13.463	8	3	6	3	507	58.5	8.95	16.27	3
74182445	0.015873	0.283682	0.465318	-1.10371	Cyp7b1	unnamed protein product [Mus musculus]	Master Protein Candidate	0	FALSE	13.463	10	3	6	3	421	48.5	7.5	16.27	3
148702920	0.015873	0.283682	0.465318	-1.10371	Cyp7b1	cytochrome P450, family 7, subfamily b, polypeptide 1 [Mus musculus]	Master Protein Candidate	0	FALSE	13.463	8	3	6	3	507	58.5	9.09	16.27	3
341940394	0.015873	0.283682	0.465318	-1.10371	Cyp7b1	RecName: Full=25-hydroxycholesterol 7-alpha-hydroxylase; AltName: Full=Cytochrome P450 7B1; AltName: Full=Hippocampal transcript 1 protein; Short=HCT-1; AltName: Full=Oxysterol 7-alpha-hydroxylase	Master Protein Candidate	0	FALSE	13.463	8	3	6	3	507	58.4	9.09	16.27	3
568920744	0.015873	0.283682	0.465318	-1.10371	Cyp7b1	PREDICTED: 25-hydroxycholesterol 7-alpha-hydroxylase isoform X2 [Mus musculus]	None	0	FALSE	4.562	7	2	3	2	352	40.4	8.79	2.09	2
58477661	0.031746	0.353216	0.460265	-1.11946	Hsd3b3	Hydroxy-delta-5-steroid dehydrogenase, 3 beta- and steroid delta-isomerase 3 [Mus musculus]	None	0	FALSE	5.645	8	2	3	2	318	36.1	8.03	3.8	2
240120132	0.031746	0.353216	0.460265	-1.11946	Hsd3b3	3 beta-hydroxysteroid dehydrogenase/Delta 5--_4-isomerase type 3 isoform 2 [Mus musculus]	None	0	FALSE	7.774	14	3	4	3	318	36.1	8.03	5.82	3
577420	0.00793651	0.283682	0.445099	-1.1678	Gstp1	glutathione S-transferase pi class B [Mus musculus]	None	0	FALSE	145.203	54	8	79	8	210	23.6	7.87	334.42	8
26347823	0.00793651	0.283682	0.445099	-1.1678	Gstp1	unnamed protein product, partial [Mus musculus]	None	0	FALSE	145.203	56	8	79	8	202	22.6	7.88	334.42	8
148701044	0.00793651	0.283682	0.445099	-1.1678		mCG3869, isoform CRA_a [Mus musculus]	None	0	FALSE	145.203	59	8	79	8	193	21.6	7.44	334.42	8
576133	0.00793651	0.283682	0.442222	-1.17716		Chain A, GLUTATHIONE S-TRANSFERASE YFYF	Master Protein Candidate	0	FALSE	154.541	59	9	89	9	209	23.5	7.87	366.01	9
126031449	0.00793651	0.283682	0.442222	-1.17716		Chain B, Glutathione S-transferase P 1	Master Protein	0	FALSE	154.541	59	9	89	9	209	23.4	7.96	366.01	9
126031451	0.00793651	0.283682	0.442222	-1.17716		Chain B, Glutathione S-transferase P 1	Master Protein Candidate	0	FALSE	154.541	59	9	89	9	209	23.4	7.96	366.01	9
40353068	0.00793651	0.283682	0.430014	-1.21754	Gstp2	Glutathione S-transferase, pi 2 [Mus musculus]	None	0	FALSE	104.329	38	5	63	5	210	23.5	7.87	275.84	5
291061432	0.00793651	0.283682	0.430014	-1.21754	Gstp2	glutathione S-transferase pi 2, partial [Mus musculus]	None	0	FALSE	104.329	42	5	63	5	188	21.1	6.92	275.84	5
148701047	0.00793651	0.283682	0.426769	-1.22847		mCG140529, isoform CRA_b [Mus musculus]	None	0	FALSE	55.063	22	3	36	3	194	21.5	8.79	157.75	3

## Sheet: STRING DATA
6730327	0.015873	0.283682	1.97025	0.978376		Chain A, Solution Structure Of The Alpha-Domain Of Mouse Metallothionein-1	Master Protein Candidate	0	FALSE	15.424	65	2	7	2	31	3	7.97	23.53	2
7305285	0.015873	0.283682	1.97025	0.978376	Mt1	metallothionein-1 [Mus musculus]	Master Protein	0	FALSE	15.424	33	2	7	2	61	6	7.96	23.53	2
21594175	0.015873	0.283682	1.75264	0.809528	Mt2	Metallothionein 2 [Mus musculus]	Master Protein	0	FALSE	12.022	33	2	7	2	61	6.1	7.83	13.39	2
666968	0.00793651	0.283682	1.35267	0.435808	Cyp3a16	cytochrome P450IIIA [Mus musculus]	None	0	FALSE	14.67	10	5	10	5	504	57.9	7.42	29.63	5
86577822	0.00793651	0.283682	1.35267	0.435808	Cyp3a16	Cytochrome P450, family 3, subfamily a, polypeptide 16 [Mus musculus]	None	0	FALSE	14.67	10	5	10	5	504	57.9	7.39	29.63	5
148687033	0.00793651	0.283682	1.35267	0.435808		mCG17264, partial [Mus musculus]	None	0	FALSE	14.67	10	5	10	5	522	59.9	7.93	29.63	5
341940389	0.00793651	0.283682	1.35267	0.435808	Cyp3a16	RecName: Full=Cytochrome P450 3A16; AltName: Full=CYPIIIA16	None	0	FALSE	14.67	10	5	10	5	504	57.8	7.39	29.63	5
568938945	0.00793651	0.283682	1.35267	0.435808	Cyp3a16	PREDICTED: cytochrome P450 3A16 isoform X1 [Mus musculus]	None	0	FALSE	13.135	9	4	9	4	482	55.5	7.15	27.68	4
1039777790	0.00793651	0.283682	1.32031	0.400879	Sult1a1	PREDICTED: sulfotransferase 1A1 isoform X2 [Mus musculus]	None	0	FALSE	58.819	59	10	26	10	227	26.7	8.24	80.42	10
14919404	0.00793651	0.283682	1.31488	0.39493	Sult1a1	Sulfotransferase family 1A, phenol-preferring, member 1 [Mus musculus]	None	0	FALSE	87.985	65	11	35	11	263	30.5	8.54	108.65	11
148685462	0.00793651	0.283682	1.31027	0.389862	Sult1a1	sulfotransferase family 1A, phenol-preferring, member 1, isoform CRA_b [Mus musculus]	Master Protein	0	FALSE	97.934	62	13	37	13	316	36.6	8.1	115.77	13
1335348669	0.00793651	0.283682	1.31027	0.389862		sulfotransferase 1A1 [Mus musculus]	Master Protein Candidate	0	FALSE	97.934	66	13	37	13	298	34.6	8.1	115.77	13
1711570	0.00793651	0.283682	1.31	0.389567	Sult1a1	RecName: Full=Sulfotransferase 1A1; Short=ST1A1; AltName: Full=Aryl sulfotransferase; AltName: Full=Phenol sulfotransferase; AltName: Full=Phenol/aryl sulfotransferase; Short=mSTp1; AltName: Full=ST1A4; AltName: Full=Sulfokinase	None	0	FALSE	82.567	53	11	32	11	291	34	8.1	98.4	11
5420463	0.00793651	0.283682	1.31	0.389567	Sult1a1	arylsulfotransferase ST1A4 [Mus musculus]	None	0	FALSE	82.567	52	11	32	11	298	34.7	8.1	98.4	11
12860603	0.00793651	0.283682	1.30805	0.387413	Hist1h1b	unnamed protein product, partial [Mus musculus]	None	0	FALSE	26.746	22	5	18	2	220	22.3	10.89	37.52	5
5932290	0.015873	0.283682	1.29564	0.373668	Igh-VJ558	immunoglobulin heavy chain constant region, partial [Mus musculus]	None	0	FALSE	13.114	25	3	3	3	243	26.2	5.01	11.53	3
14789819	0.015873	0.283682	1.29564	0.373668	Igh-VJ558	Igh protein, partial [Mus musculus]	None	0	FALSE	13.114	13	3	3	3	480	51.9	5.2	11.53	3
15029912	0.015873	0.283682	1.29564	0.373668	Igh-VJ558	Igh protein [Mus musculus]	None	0	FALSE	13.114	13	3	3	3	482	51.8	5.19	11.53	3
15488687	0.015873	0.283682	1.29564	0.373668	Igh-VJ558	Igh protein [Mus musculus]	None	0	FALSE	13.114	13	3	3	3	481	52.1	5.57	11.53	3
15488815	0.015873	0.283682	1.29564	0.373668	Igh-VJ558	Igh protein [Mus musculus]	None	0	FALSE	13.114	13	3	3	3	488	52.9	5.2	11.53	3
15489086	0.015873	0.283682	1.29564	0.373668	Igh-VJ558	Igh protein [Mus musculus]	None	0	FALSE	13.114	13	3	3	3	479	51.6	5.27	11.53	3
17390754	0.015873	0.283682	1.29564	0.373668	Igh-VJ558	Igh protein [Mus musculus]	None	0	FALSE	13.114	12	3	3	3	489	53.2	5.38	11.53	3
18043871	0.015873	0.283682	1.29564	0.373668	Igh-VJ558	Igh protein [Mus musculus]	None	0	FALSE	13.114	13	3	3	3	484	52.8	5.12	11.53	3
29165690	0.015873	0.283682	1.29564	0.373668	Igh-VJ558	Igh protein [Mus musculus]	None	0	FALSE	13.114	13	3	3	3	487	53	5.22	11.53	3
34784416	0.015873	0.283682	1.29564	0.373668		Igh protein [Mus musculus]	None	0	FALSE	13.114	13	3	3	3	485	52.9	5.2	11.53	3
37589305	0.015873	0.283682	1.29564	0.373668	LOC544903	Igh protein [Mus musculus]	None	0	FALSE	13.114	13	3	3	3	485	52.4	5.27	11.53	3
55153945	0.015873	0.283682	1.29564	0.373668	LOC544903	Igh protein [Mus musculus]	None	0	FALSE	13.114	13	3	3	3	484	52	5.25	11.53	3
55154484	0.015873	0.283682	1.29564	0.373668	LOC544903	Igh protein [Mus musculus]	None	0	FALSE	13.114	13	3	3	3	483	52.7	5.06	11.53	3
62024603	0.015873	0.283682	1.29564	0.373668	LOC544903	Igh protein [Mus musculus]	None	0	FALSE	13.114	13	3	3	3	487	52.6	5.26	11.53	3
62027570	0.015873	0.283682	1.29564	0.373668		Igh protein [Mus musculus]	None	0	FALSE	13.114	13	3	3	3	485	52.3	5.34	11.53	3
62471425	0.015873	0.283682	1.29564	0.373668	LOC544903	Igh protein [Mus musculus]	None	0	FALSE	13.114	13	3	3	3	483	52.3	5.47	11.53	3
62739252	0.015873	0.283682	1.29564	0.373668	LOC544903	Igh protein [Mus musculus]	None	0	FALSE	13.114	13	3	3	3	483	52.1	5.27	11.53	3
66396647	0.015873	0.283682	1.29564	0.373668	LOC544903	Igh protein [Mus musculus]	None	0	FALSE	13.114	13	3	3	3	483	52.4	5.55	11.53	3
66794516	0.015873	0.283682	1.29564	0.373668	LOC544903	Igh protein [Mus musculus]	None	0	FALSE	13.114	13	3	3	3	476	51.4	5.15	11.53	3
76779882	0.015873	0.283682	1.29564	0.373668		Igh protein [Mus musculus]	None	0	FALSE	13.114	13	3	3	3	479	51.7	5.12	11.53	3
80474423	0.015873	0.283682	1.29564	0.373668		Igh protein [Mus musculus]	None	0	FALSE	13.114	13	3	3	3	482	52	5.55	11.53	3
83405895	0.015873	0.283682	1.29564	0.373668	Igh-VJ558	Unknown (protein for MGC:118134) [Mus musculus]	None	0	FALSE	13.114	13	3	3	3	482	52.1	5.55	11.53	3
86577658	0.015873	0.283682	1.29564	0.373668		Igh protein [Mus musculus]	None	0	FALSE	13.114	13	3	3	3	486	53	5.08	11.53	3
1200246	0.00793651	0.283682	0.807273	-0.308872	S100a8	MRP8 protein [Mus musculus]	None	0	FALSE	11.361	57	3	7	3	89	10.3	5.68	20.46	3
51873768	0.00793651	0.283682	0.784173	-0.350757	S100a8	S100 calcium binding protein A8 (calgranulin A) [Mus musculus]	Master Protein	0	FALSE	19.909	81	4	8	4	89	10.3	5.68	25.62	4
148706090	0.00793651	0.283682	0.78021	-0.358065	2810007J24Rik; Sult2a8	RIKEN cDNA 2810007J24, isoform CRA_b [Mus musculus]	None	0	FALSE	24.99	83	5	14	5	60	7.1	5.83	39.36	5
755551687	0.00793651	0.283682	0.769024	-0.378899	Csad	PREDICTED: cysteine sulfinic acid decarboxylase isoform X1 [Mus musculus]	None	0	FALSE	87.793	43	13	31	13	463	51.6	6.48	103.7	13
755551701	0.00793651	0.283682	0.769024	-0.378899	Csad	PREDICTED: cysteine sulfinic acid decarboxylase isoform X4 [Mus musculus]	None	0	FALSE	84.524	45	12	29	12	428	47.3	7.74	99.02	12
1039748914	0.00793651	0.283682	0.769024	-0.378899	Csad	PREDICTED: cysteine sulfinic acid decarboxylase isoform X2 [Mus musculus]	None	0	FALSE	87.793	40	13	31	13	500	55	7.9	103.7	13
1315690770	0.00793651	0.283682	0.769024	-0.378899		cysteine sulfinic acid decarboxylase isoform 2 [Mus musculus]	None	0	FALSE	87.793	50	13	31	13	398	44.2	6.84	103.7	13
21594473	0.00793651	0.283682	0.766397	-0.383836	2810007J24Rik; Sult2a8	2810007J24Rik protein [Mus musculus]	Master Protein Candidate	0	FALSE	84.479	55	14	37	14	282	33.3	7.02	115.09	14
148706092	0.00793651	0.283682	0.766397	-0.383836	2810007J24Rik; Sult2a8	RIKEN cDNA 2810007J24, isoform CRA_a [Mus musculus]	Master Protein	0	FALSE	84.479	55	14	37	14	282	33.3	7.02	115.09	14
13785552	0.0396825	0.428629	0.751886	-0.411414	Slco1a5	organic anion transporting polypeptide 3 [Mus musculus]	None	0	FALSE	14.014	5	3	7	3	670	74.8	7.94	22.41	3
27734554	0.0396825	0.428629	0.751886	-0.411414	Slco1a5	RecName: Full=Solute carrier organic anion transporter family member 1A5; AltName: Full=Organic anion-transporting polypeptide 3; Short=OATP-3; AltName: Full=Sodium-independent organic anion transporter 3; AltName: Full=Solute carrier family 21 member 7	None	0	FALSE	14.014	5	3	7	3	670	74.6	7.94	22.41	3
169313596	0.00793651	0.283682	0.747292	-0.420255	2810007J24Rik; Sult2a8	sulfotransferase-like protein 2 [Mus musculus]	None	0	FALSE	53.887	59	8	20	8	157	18.6	8.09	65.07	8
148672056	0.00793651	0.283682	0.738095	-0.438121	Csad	cysteine sulfinic acid decarboxylase, isoform CRA_a [Mus musculus]	Master Protein	0	FALSE	94.117	42	14	36	14	493	55.1	6.61	119.15	14
20429722	0.00793651	0.283682	0.736981	-0.4403	Csad	cysteine sulfinic acid decarboxylase [Mus musculus]	None	0	FALSE	85.653	37	13	34	13	493	55.1	6.61	109.53	13
8170809	0.015873	0.283682	0.708151	-0.497872	Selenbp2	AP56 [Mus musculus]	Master Protein	0	FALSE	302.936	83	31	131	7	472	52.6	6.18	506.17	31
148706801	0.015873	0.283682	0.706503	-0.501233		mCG125538 [Mus musculus]	None	0	FALSE	167.817	78	16	67	3	290	32.3	6.58	268.17	16
12963797	0.015873	0.283682	0.700724	-0.513082	Slco1a6	solute carrier organic anion transporter family member 1A6 [Mus musculus]	None	0	FALSE	10.369	4	2	4	2	670	74.1	7.99	13.92	2
48735214	0.015873	0.283682	0.700724	-0.513082	Slco1a6	Solute carrier organic anion transporter family, member 1a6 [Mus musculus]	None	0	FALSE	10.369	4	2	4	2	670	74.2	7.85	13.92	2
840650	0.031746	0.353216	0.681329	-0.553577	Hsd3b5	3-ketosteroid reductase [Mus musculus domesticus]	Master Protein Candidate	0	FALSE	23.792	15	5	5	4	373	41.9	9.1	15.38	5
113680667	0.031746	0.353216	0.681329	-0.553577	Hsd3b5	NADPH-dependent 3-keto-steroid reductase Hsd3b5 [Mus musculus]	Master Protein	0	FALSE	23.792	15	5	5	4	373	41.9	9.01	15.38	5
15667243	0.0396825	0.428629	0.570119	-0.810665	Hsd3b6	3 beta-hydroxysteroid dehydrogenase isomerase VI [Mus musculus]	None	0	FALSE	22.703	16	4	7	3	373	41.8	6.35	18	4
25955696	0.0396825	0.428629	0.570119	-0.810665	Hsd3b2	Hydroxy-delta-5-steroid dehydrogenase, 3 beta- and steroid delta-isomerase 2 [Mus musculus]	None	0	FALSE	20.573	10	3	6	2	373	42	6.54	15.98	3
31419724	0.0396825	0.428629	0.570119	-0.810665	Hsd3b6	Hsd3b6 protein [Mus musculus]	None	0	FALSE	22.703	16	4	7	3	373	42	6.19	18	4
39979279	0.0396825	0.428629	0.570119	-0.810665	Hsd3b6	3beta-hydroxysteroid dehydrogenase VI [Mus musculus]	None	0	FALSE	22.703	16	4	7	3	373	41.9	6.19	18	4
74209271	0.0396825	0.428629	0.570119	-0.810665	Hsd3b6	unnamed protein product [Mus musculus]	None	0	FALSE	22.703	16	4	7	3	373	42	6.35	18	4
148707019	0.0396825	0.428629	0.570119	-0.810665		mCG119535, isoform CRA_a [Mus musculus]	None	0	FALSE	20.573	10	3	6	2	373	41.9	6.37	15.98	3
755503388	0.0396825	0.428629	0.570119	-0.810665	Hsd3b2	PREDICTED: 3 beta-hydroxysteroid dehydrogenase/Delta 5--_4-isomerase type 2 isoform X2 [Mus musculus]	None	0	FALSE	20.573	11	3	6	2	332	37.3	6.73	15.98	3
1039763827	0.0396825	0.428629	0.570119	-0.810665	Hsd3b3	PREDICTED: 3 beta-hydroxysteroid dehydrogenase/Delta 5--_4-isomerase type 3 isoform X3 [Mus musculus]	None	0	FALSE	24.432	18	5	8	4	387	43.8	8.79	18	5
1327850606	0.0396825	0.428629	0.570119	-0.810665		3 beta-hydroxysteroid dehydrogenase/Delta 5--_4-isomerase type 2 [Mus musculus]	None	0	FALSE	20.573	10	3	6	2	373	41.9	6.37	15.98	3
4557948	0.015873	0.283682	0.466042	-1.10147		Chain E, Modified Glutathione S-Transferase (Pi) Complexed With S (P- Nitrobenzyl)glutathione	None	0	FALSE	117.589	47	8	70	8	209	23.5	7.96	280.57	8
340707738	0.015873	0.283682	0.466042	-1.10147		Chain B, Glutathione S-transferase P 1	None	0	FALSE	117.589	47	8	70	8	209	23.4	7.96	280.57	8
1226238	0.015873	0.283682	0.465318	-1.10371	Cyp7b1	cytochrome P450 Cyp7b1 [Mus musculus]	Master Protein	0	FALSE	13.463	8	3	6	3	507	58.4	8.94	16.27	3
74146205	0.015873	0.283682	0.465318	-1.10371	Cyp7b1	unnamed protein product [Mus musculus]	Master Protein Candidate	0	FALSE	13.463	8	3	6	3	507	58.5	8.95	16.27	3
74182445	0.015873	0.283682	0.465318	-1.10371	Cyp7b1	unnamed protein product [Mus musculus]	Master Protein Candidate	0	FALSE	13.463	10	3	6	3	421	48.5	7.5	16.27	3
148702920	0.015873	0.283682	0.465318	-1.10371	Cyp7b1	cytochrome P450, family 7, subfamily b, polypeptide 1 [Mus musculus]	Master Protein Candidate	0	FALSE	13.463	8	3	6	3	507	58.5	9.09	16.27	3
341940394	0.015873	0.283682	0.465318	-1.10371	Cyp7b1	RecName: Full=25-hydroxycholesterol 7-alpha-hydroxylase; AltName: Full=Cytochrome P450 7B1; AltName: Full=Hippocampal transcript 1 protein; Short=HCT-1; AltName: Full=Oxysterol 7-alpha-hydroxylase	Master Protein Candidate	0	FALSE	13.463	8	3	6	3	507	58.4	9.09	16.27	3
568920744	0.015873	0.283682	0.465318	-1.10371	Cyp7b1	PREDICTED: 25-hydroxycholesterol 7-alpha-hydroxylase isoform X2 [Mus musculus]	None	0	FALSE	4.562	7	2	3	2	352	40.4	8.79	2.09	2
58477661	0.031746	0.353216	0.460265	-1.11946	Hsd3b3	Hydroxy-delta-5-steroid dehydrogenase, 3 beta- and steroid delta-isomerase 3 [Mus musculus]	None	0	FALSE	5.645	8	2	3	2	318	36.1	8.03	3.8	2
240120132	0.031746	0.353216	0.460265	-1.11946	Hsd3b3	3 beta-hydroxysteroid dehydrogenase/Delta 5--_4-isomerase type 3 isoform 2 [Mus musculus]	None	0	FALSE	7.774	14	3	4	3	318	36.1	8.03	5.82	3
577420	0.00793651	0.283682	0.445099	-1.1678	Gstp1	glutathione S-transferase pi class B [Mus musculus]	None	0	FALSE	145.203	54	8	79	8	210	23.6	7.87	334.42	8
26347823	0.00793651	0.283682	0.445099	-1.1678	Gstp1	unnamed protein product, partial [Mus musculus]	None	0	FALSE	145.203	56	8	79	8	202	22.6	7.88	334.42	8
148701044	0.00793651	0.283682	0.445099	-1.1678		mCG3869, isoform CRA_a [Mus musculus]	None	0	FALSE	145.203	59	8	79	8	193	21.6	7.44	334.42	8
576133	0.00793651	0.283682	0.442222	-1.17716		Chain A, GLUTATHIONE S-TRANSFERASE YFYF	Master Protein Candidate	0	FALSE	154.541	59	9	89	9	209	23.5	7.87	366.01	9
126031449	0.00793651	0.283682	0.442222	-1.17716		Chain B, Glutathione S-transferase P 1	Master Protein	0	FALSE	154.541	59	9	89	9	209	23.4	7.96	366.01	9
126031451	0.00793651	0.283682	0.442222	-1.17716		Chain B, Glutathione S-transferase P 1	Master Protein Candidate	0	FALSE	154.541	59	9	89	9	209	23.4	7.96	366.01	9
40353068	0.00793651	0.283682	0.430014	-1.21754	Gstp2	Glutathione S-transferase, pi 2 [Mus musculus]	None	0	FALSE	104.329	38	5	63	5	210	23.5	7.87	275.84	5
291061432	0.00793651	0.283682	0.430014	-1.21754	Gstp2	glutathione S-transferase pi 2, partial [Mus musculus]	None	0	FALSE	104.329	42	5	63	5	188	21.1	6.92	275.84	5
148701047	0.00793651	0.283682	0.426769	-1.22847	0	mCG140529, isoform CRA_b [Mus musculus]	None	0	FALSE	55.063	22	3	36	3	194	21.5	8.79	157.75	3
